# Supplementary material for: Copper-catalyzed synthesis of cyclopropyl bis(boronates) from aryl olefins and carbon monoxide
Source: Royal Society of Chemistry journal article supplement (doi:10.1039/d2qo00976e), 2022-01-01

## Supporting Information

# Copper-Catalyzed Synthesis of Cyclopropyl Bis(boronates) from Aryl Olefins and Carbon Monoxide

Hui-Qing Geng,<sup>a</sup> Wenbo Li,<sup>c</sup> Yanying Zhao,<sup>c</sup> and Xiao-Feng Wu<sup>\*a,b</sup>

<sup>a</sup>, Leibniz-Institut für Katalyse e.V., Albert-Einstein-Straße 29a, 18059 Rostock, Germany

<sup>b</sup>, Dalian National Laboratory for Clean Energy, Dalian Institute of Chemical Physics, Chinese Academy of Sciences, 116023, Dalian, Liaoning, China,

<sup>c</sup>. Department of Chemistry, Key Laboratory of Surface & Interface Science of Polymer Materials of Zhejiang Province, Zhejiang Sci-Tech University, Hangzhou 310018, China

E-mail: xiao-feng.wu@catalysis.de

### 1. Table of Contents

#### Contents

|                                                   |     |
|---------------------------------------------------|-----|
| 1. Table of Contents .....                        | S1  |
| 2. General information .....                      | S2  |
| 3. Experimental Procedures.....                   | S3  |
| 3.1 Supplementary Tables .....                    | S3  |
| 3.2 General Procedures for preparing alkenes..... | S12 |
| 3.3 General Procedures A.....                     | S13 |
| 3.4 General Procedures B.....                     | S13 |
| 4 NMR Spectra of the Products.....                | S14 |
| 5 Derivatization of 3a.....                       | S24 |
| 6. Reference.....                                 | S26 |
| 7. Spectra of Products.....                       | S27 |
| 8. X-Ray data.....                                | S92 |

## 2. General information

Unless otherwise noted, all commercial reagents were ordered from Sigma-Aldrich, TCI, ABCR, or Across. All solvents (anhydrous and under inert atmosphere) were collected by M BRAUN from the solvent purification system and used under standard Schlenk techniques. Olefins were synthesized based on known literatures. Column chromatography was performed on silica gel (200-300 meshes) using *n*-pentane (bp. 36.1 °C), dichloromethane and ethyl acetate as eluents. All NMR spectra were recorded at ambient temperature using Bruker Advance 300 NMR, Bruker ARX 400 NMR spectrometers. Multiplets were assigned as follows: chemical shift ( $\delta$  ppm), multiplicity (s = singlet, d = doublet, t = triplet, q = quartet, m = multiplet, br = broad), coupling constant (Hz), and integration. All  $^{13}\text{C}$  NMR spectra were broad-band  $^1\text{H}$  decoupled. Gas chromatography (GC) analyses were performed on an Agilent HP-7890A instrument with a FID detector and HP-5 capillary column (polydimethylsiloxane with 5% phenyl groups, 30 m, 0.32 mm i.d. 0.25  $\mu\text{m}$  film thickness) using argon as carrier gas. High resolution mass spectra (HRMS) were recorded on an Agilent 6210 system. Because of the high toxicity of carbon monoxide, all reactions should be performed in an autoclave. The laboratory should be well-equipped with a CO detector and alarm system.

### 3. Experimental Procedures

#### 3.1 Supplementary Tables

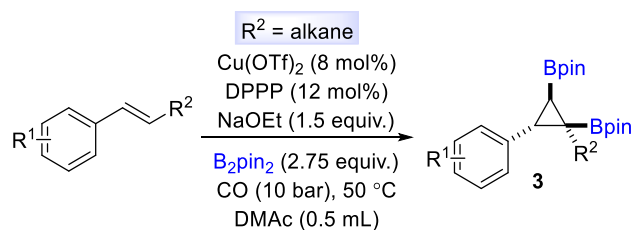

#### 3.1.1 Optimization reaction condition for 3a.

Table S1 Screening of Ligand<sup>a</sup>

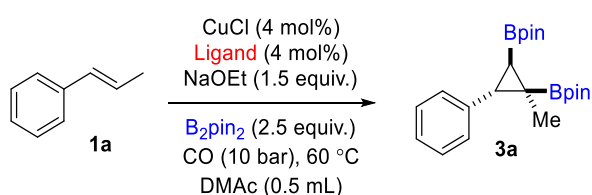

| Entry | Ligand                  | Yield of 3a (%) |
|-------|-------------------------|-----------------|
| 1     | DPPM                    | 11              |
| 2     | DPPE                    | 23              |
| 3     | DPPP                    | 37              |
| 4     | DPPB                    | 17              |
| 5     | DPPF                    | 19              |
| 6     | DCyPE                   | 23              |
| 7     | DCyPP                   | 20              |
| 8     | DPEphos                 | 9               |
| 9     | Xantphos                | 14              |
| 10    | (R)-Tol-BINAP           | 2               |
| 11    | ChiraPhos               | 15              |
| 12    | Ph-BPE                  | 27              |
| 13    | BuPAd <sub>2</sub>      | 13              |
| 14    | BDPP                    | 19              |
| 15    | DPPBz                   | 13              |
| 6     | 4-OMe-dppp              | 32              |
| 17    | 4-CF <sub>3</sub> -dppp | 6               |

[a] Reaction conditions: *trans*- $\beta$ -methylstyrene (0.2 mmol), B<sub>2</sub>pin<sub>2</sub> (2.5 equiv.), CuCl (4 mol%), ligand (4 mol%), NaOEt (1.5 equiv.), CO (10 bar), DMAc (0.4 M), stirred at 60 °C for 24 h. Yields are determined by GC with hexadecane as an internal standard.

**Table S2 Screening of Catalysis<sup>a</sup>**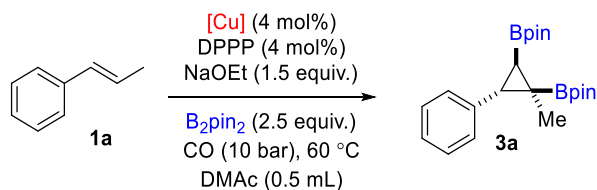

| Entry | [Cu]                    | Yield of <b>3a</b> (%) |
|-------|-------------------------|------------------------|
| 1     | CuCl <sub>2</sub>       | 34                     |
| 2     | CuCN                    | 18                     |
| 3     | Cu(OAc) <sub>2</sub>    | 39                     |
| 4     | CuI                     | 37                     |
| 5     | CuBr(Me <sub>2</sub> S) | 37                     |
| 6     | LiCuCl <sub>4</sub>     | 30                     |
| 7     | iPrCuCl                 | 34                     |
| 8     | iMesCuCl                | 38                     |
| 9     | CuSO <sub>4</sub>       | 28                     |
| 10    | Cu(OTf) <sub>2</sub>    | 40                     |
| 11    | Cu(acac) <sub>2</sub>   | 32                     |
| 12    | Cu(OAc) <sub>2</sub>    | 35                     |
| 13    | Cu(OTf)•Toluene         | 34                     |

[a] Reaction conditions: *trans*- $\beta$ -methylstyrene (0.2 mmol), B<sub>2</sub>pin<sub>2</sub> (2.5 equiv.), [Cu] (4 mol%), DPPP (4 mol%), NaOEt (1.5 equiv.), CO (10 bar), DMAc (0.4 M), stirred at 60 °C for 16 h. Yields are determined by GC with hexadecane as an internal standard.

**Table S3 Screening of the amount of Catalysis<sup>a</sup>**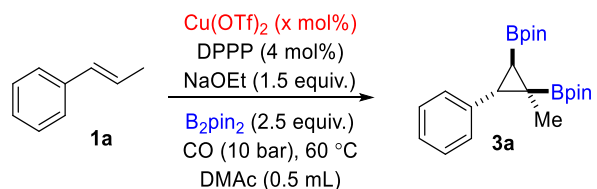

| Entry | Cu(OTf) <sub>2</sub> (mol%) | Yield of <b>3a</b> (%) |
|-------|-----------------------------|------------------------|
| 1     | 4                           | 40                     |
| 2     | 8                           | 51                     |
| 3     | 10                          | 34                     |

[a] Reaction conditions: *trans*- $\beta$ -methylstyrene (0.2 mmol), B<sub>2</sub>pin<sub>2</sub> (2.5 equiv.), Cu(OTf)<sub>2</sub> (x mol%), DPPP (x mol%), NaOEt (1.5 equiv.), CO (10 bar), DMAc (0.4 M), stirred at 60 °C for 24 h. Yields are determined by GC with hexadecane as an internal standard.

**Table S4 Screening of the amount of Ligand<sup>a</sup>**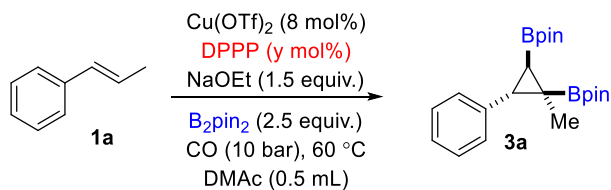

| Entry | Dppp (mol%) | Yield of <b>3a</b> (%) |
|-------|-------------|------------------------|
| 1     | 8           | 51                     |
| 2     | 12          | 55                     |
| 3     | 16          | 47                     |
| 4     | 20          | 41                     |

[a] Reaction conditions: *trans*- $\beta$ -methylstyrene (0.2 mmol), B<sub>2</sub>pin<sub>2</sub> (2.5 equiv.), Cu(OTf)<sub>2</sub> (8 mol%), DPPPP (y mol%), NaOEt (1.5 equiv.), CO (10 bar), DMAc (0.4 M), stirred at 60 °C for 22 h. Yields are determined by GC with hexadecane as an internal standard.

**Table S5 Screening of Base<sup>a</sup>**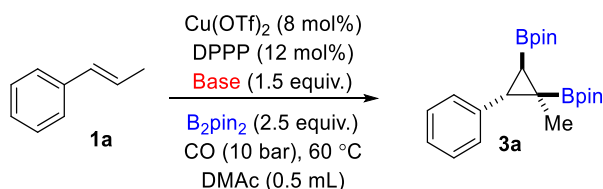

| Entry | Solvent                         | Yield of <b>3a</b> (%) |
|-------|---------------------------------|------------------------|
| 1     | NaO <sup>t</sup> Bu             | 14                     |
| 2     | NaOMe                           | 6                      |
| 3     | NaOPh                           | /                      |
| 4     | KO <sup>t</sup> Bu              | 10                     |
| 5     | LiO <sup>t</sup> Bu             | 6                      |
| 6     | NaO <sup>i</sup> Pr             | /                      |
| 7     | Cs <sub>2</sub> CO <sub>3</sub> | 50                     |
| 8     | Na <sub>2</sub> CO <sub>3</sub> | /                      |
| 9     | Cs(OAc)                         | Trace                  |
| 10    | K <sub>2</sub> CO <sub>3</sub>  | 5                      |
| 11    | K <sub>3</sub> PO <sub>4</sub>  | 25                     |
| 12    | KOH                             | 9                      |
| 13    | NEt <sub>3</sub>                | /                      |
| 14    | DIPEA                           | /                      |
| 15    | NaOEt                           | 55                     |

[a] Reaction conditions: *trans*- $\beta$ -methylstyrene (0.2 mmol), B<sub>2</sub>pin<sub>2</sub> (2.5 equiv.), Cu(OTf)<sub>2</sub> (8 mol%), DPPPP (12 mol%), Base (1.5 equiv.), CO (10 bar), DMAc (0.4 M), stirred at 60 °C for 22 h. Yields are determined by GC with hexadecane as an internal standard.

**Table S6 Screening of the amount of B<sub>2</sub>pin<sub>2</sub><sup>a</sup>**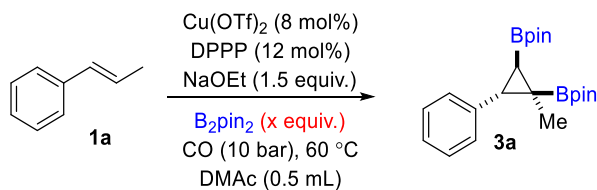

| Entry | B <sub>2</sub> pin <sub>2</sub> | Yield of <b>3a</b> (%) |
|-------|---------------------------------|------------------------|
| 1     | 1.5                             | 33                     |
| 2     | 2.0                             | 46                     |
| 3     | 2.2                             | 45                     |
| 4     | 2.5                             | 55                     |
| 5     | 2.75                            | 63                     |
| 6     | 3.0                             | 60                     |
| 7     | 3.5                             | 60                     |

[a] Reaction conditions: *trans*- $\beta$ -methylstyrene (0.2 mmol), B<sub>2</sub>pin<sub>2</sub> (2.5 equiv.), Cu(OTf)<sub>2</sub> (8 mol%), DPPPP (12 mol%), NaOEt (1.5 equiv.), CO (10 bar), DMAc (0.4 M), stirred at 60 °C for 22 h. Yields are determined by GC with hexadecane as an internal standard.

**Table S7 Screening of the amount of Base<sup>a</sup>**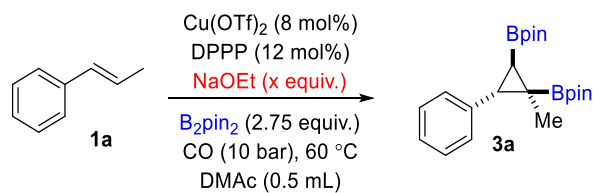

| Entry | NaOEt | Yield of <b>3a</b> (%) |
|-------|-------|------------------------|
| 1     | 1.3   | 60                     |
| 2     | 1.5   | 63                     |
| 3     | 1.7   | 58                     |
| 4     | 2.0   | 56                     |
| 5     | 2.5   | 53                     |

[a] Reaction conditions: *trans*- $\beta$ -methylstyrene (0.2 mmol), B<sub>2</sub>pin<sub>2</sub> (2.5 equiv.), Cu(OTf)<sub>2</sub> (8 mol%), DPPPP (12 mol%), NaOEt (1.5 equiv.), CO (10 bar), DMAc (0.4 M), stirred at 60 °C for 22 h. Yields are determined by GC with hexadecane as an internal standard.

**Table S8 Screening of Temperature<sup>a</sup>**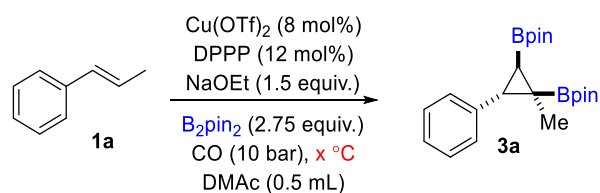

| Entry | Temperature | Yield of <b>3a</b> (%) |
|-------|-------------|------------------------|
| 1     | 40          | 45                     |
| 2     | 50          | 74 (61 <sup>b</sup> )  |
| 3     | 60          | 63                     |
| 4     | 70          | 57                     |

[a] Reaction conditions: *trans*- $\beta$ -methylstyrene (0.2 mmol),  $\text{B}_2\text{pin}_2$  (2.5 equiv.),  $\text{Cu}(\text{OTf})_2$  (8 mol%), DPPP (12 mol%), NaOEt (1.5 equiv.), CO (10 bar), DMAc (0.4 M), stirred at 60 °C for 22 h. Yields are determined by GC with hexadecane as an internal standard. [b] Isolated yield.

**Table S9 Screening of Solvent<sup>a</sup>**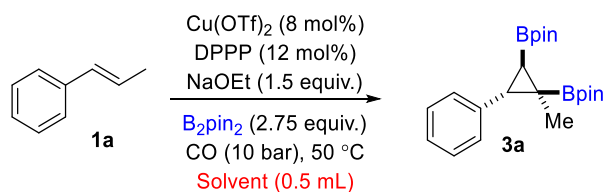

| Entry | Solvent     | Yield of <b>3a</b> (%) |
|-------|-------------|------------------------|
| 1     | DMF         | 35                     |
| 2     | DMSO        | 23                     |
| 3     | NMP         | 34                     |
| 4     | THF         | 16                     |
| 5     | Toluene     | 34                     |
| 6     | MeCN        | 29                     |
| 7     | Cyclohexane | 25                     |

[a] Reaction conditions: *trans*- $\beta$ -methylstyrene (0.2 mmol),  $\text{B}_2\text{pin}_2$  (2.5 equiv.),  $\text{Cu}(\text{OTf})_2$  (8 mol%), DPPP (12 mol%), NaOEt (1.5 equiv.), CO (10 bar), DMAc (0.4 M), stirred at 60 °C for 22 h. Yields are determined by GC with hexadecane as an internal standard.

### 3.1.2 Optimization reaction condition for 4a.

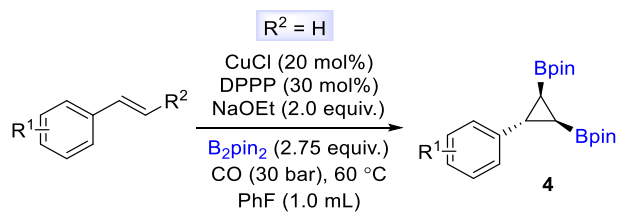

**Table S10 Screening of Solvent<sup>a</sup>**

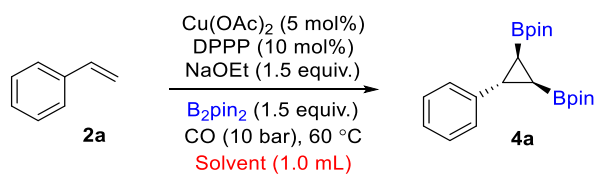

| Entry | Solvent             | Yield of <b>4a</b> (%) |
|-------|---------------------|------------------------|
| 1     | Cycloheptane        | 2                      |
| 2     | PhCl                | 15                     |
| 3     | PhF                 | 18                     |
| 4     | PhOMe               | 4                      |
| 5     | MeCN                | 8                      |
| 6     | THF                 | 8                      |
| 7     | 1,4-Dioxane         | 13                     |
| 8     | DMAc                | 3                      |
| 9     | Toluene             | 7                      |
| 10    | Et <sub>2</sub> O   | 14                     |
| 11    | PhCF <sub>3</sub>   | 13                     |
| 12    | General procedure A | Trace                  |

[a] Reaction conditions: styrene (0.2 mmol), B<sub>2</sub>pin<sub>2</sub> (1.5 equiv.), Cu(OAc)<sub>2</sub> (5 mol%), DPPPP (10 mol%), NaOEt (1.5 equiv.), CO (10 bar), solvent (1 mL), stirred at 60 °C for 24 h. Yields are determined by GC with hexadecane as an internal standard.



**Table S11 Screening of Ligand<sup>a</sup>**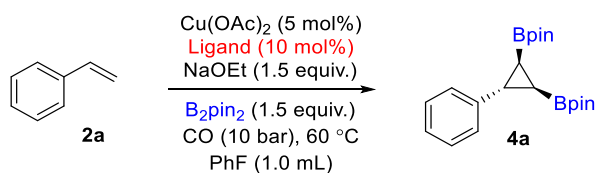

| Entry | Ligand             | Yield of <b>4a</b> (%) |
|-------|--------------------|------------------------|
| 1     | DPEphos            | -                      |
| 2     | Xantphos           | -                      |
| 3     | BINAP              | 4                      |
| 4     | BIPHEphos          | 5                      |
| 5     | BuPAD <sub>2</sub> | 3                      |
| 6     | DPPE               | 6                      |
| 7     | DPPB               | 2                      |
| 8     | DPPPE              | 3                      |
| 9     | DPPBz              | 2                      |
| 10    | DPPF               | 2                      |
| 11    | DPPM               | -                      |
| 12    | 2,2'-Bipyridine    | 2                      |
| 13    | DPPP               | 18                     |

[a] Reaction conditions: styrene (0.2 mmol),  $\text{B}_2\text{pin}_2$  (1.5 equiv.),  $\text{Cu(OAc)}_2$  (5 mol%), Ligand (10 mol%), NaOEt (1.5 equiv.), CO (10 bar), PhF (1 mL), stirred at 60 °C for 24 h. Yields are determined by GC with hexadecane as an internal standard.

**Table S12 Screening of Catalysis<sup>a</sup>**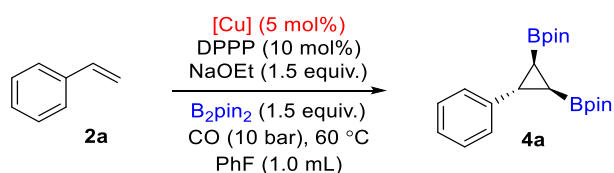

| Entry | [Cu]                 | Yield of <b>4a</b> (%) |
|-------|----------------------|------------------------|
| 1     | $\text{Cu(OAc)}_2$   | 18                     |
| 2     | $\text{CuCl}_2$      | 13                     |
| 3     | $\text{CuCl}$        | 21                     |
| 4     | $\text{Cu(acac)}_2$  | 12                     |
| 5     | <sup>t</sup> MesCuCl | 6                      |
| 6     | CuI                  | 10                     |
| 7     | CuBr                 | 8                      |
| 8     | CuCN                 | -                      |
| 9     | $\text{Cu(OTf)}_2$   | 4                      |

[a] Reaction conditions: styrene (0.2 mmol),  $\text{B}_2\text{pin}_2$  (1.5 equiv.), [Cu] (5 mol%), DPPP (10 mol%), NaOEt (1.5 equiv.), CO (10 bar), PhF (1 mL), stirred at 60 °C for 24 h. Yields are determined by GC with hexadecane as an internal standard.

**Table S13 Screening of the amount of B<sub>2</sub>pin<sub>2</sub><sup>a</sup>**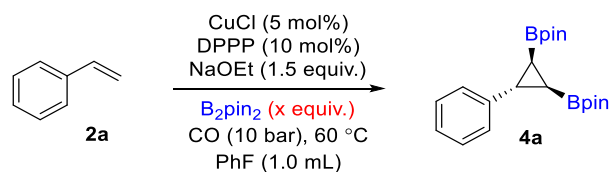

| Entry | B <sub>2</sub> pin <sub>2</sub> (x equiv.) | Yield of <b>4a</b> (%) |
|-------|--------------------------------------------|------------------------|
| 1     | 1.5                                        | 21                     |
| 2     | 2.0                                        | 20                     |
| 3     | 2.5                                        | 23                     |
| 4     | 2.75                                       | 25                     |
| 5     | 3.0                                        | 22                     |

[a] Reaction conditions: styrene (0.2 mmol), B<sub>2</sub>pin<sub>2</sub> (x equiv.), CuCl (5 mol%), DPPP (10 mol%), NaOEt (1.5 equiv.), CO (10 bar), PhF (1 mL), stirred at 60 °C for 24 h. Yields are determined by GC with hexadecane as an internal standard.

**Table S14 Screening of the amount of Base<sup>a</sup>**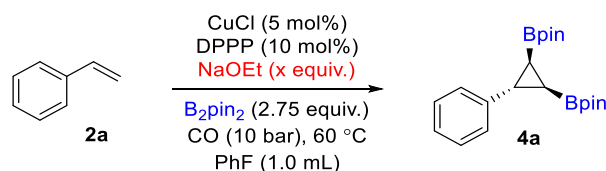

| Entry | Base (x equiv.) | Yield of <b>4a</b> (%) |
|-------|-----------------|------------------------|
| 1     | 1.5             | 25                     |
| 2     | 2.0             | 29                     |
| 3     | 2.5             | 27                     |
| 4     | 3.0             | 24                     |

[a] Reaction conditions: styrene (0.2 mmol), B<sub>2</sub>pin<sub>2</sub> (x equiv.), CuCl (5 mol%), DPPP (10 mol%), NaOEt (1.5 equiv.), CO (10 bar), PhF (1 mL), stirred at 60 °C for 24 h. Yields are determined by GC with hexadecane as an internal standard.

**Table S15 Screening of Temperature<sup>a</sup>**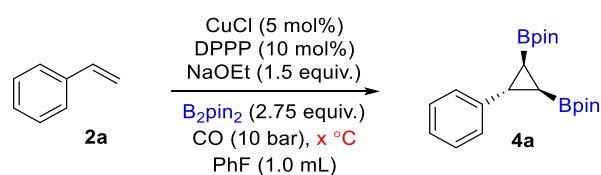

| Entry | Temperature (°C) | Yield of <b>4a</b> (%) |
|-------|------------------|------------------------|
| 1     | 40               | 13                     |
| 2     | 50               | 18                     |
| 3     | 60               | 29                     |
| 4     | 80               | 12                     |
| 5     | 100              | 6                      |

[a] Reaction conditions: styrene (0.2 mmol), B<sub>2</sub>pin<sub>2</sub> (1.5 equiv.), [Cu] (5 mol%), DPPP (10 mol%), NaOEt (1.5 equiv.), CO (10 bar), PhF (1 mL), stirred at 60 °C for 24 h. Yields are determined by GC with hexadecane as an internal standard.

**Table S16 Screening of CO pressure<sup>a</sup>**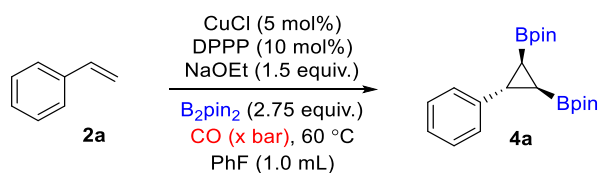

| Entry | CO (bar) | Yield of 4a (%) |
|-------|----------|-----------------|
| 1     | 10       | 29              |
| 2     | 20       | 38              |
| 3     | 30       | 49              |
| 4     | 40       | 44              |

[a] Reaction conditions: styrene (0.2 mmol), B<sub>2</sub>pin<sub>2</sub> (1.5 equiv.), CuCl (10 mol%), DPPP (10 mol%), NaOEt (1.5 equiv.), CO, PhF (1 mL), stirred at 60 °C for 16 h. Yields are determined by GC with hexadecane as an internal standard.

**Table S17 Screening of the amount of Catalysis<sup>a</sup>**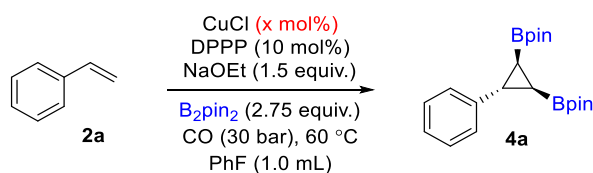

| Entry | CuCl (x mol%) | Yield of 4a (%) |
|-------|---------------|-----------------|
| 1     | 10            | 49              |
| 2     | 20            | 53              |
| 3     | 30            | 43              |
| 4     | 40            | 25              |

[a] Reaction conditions: styrene (0.2 mmol), B<sub>2</sub>pin<sub>2</sub> (1.5 equiv.), CuCl (x mol%), DPPP (10 mol%), NaOEt (1.5 equiv.), CO (10 bar), PhF (1 mL), stirred at 60 °C for 24 h. Yields are determined by GC with hexadecane as an internal standard.

**Table S18 Screening of the amount of Ligand<sup>a</sup>**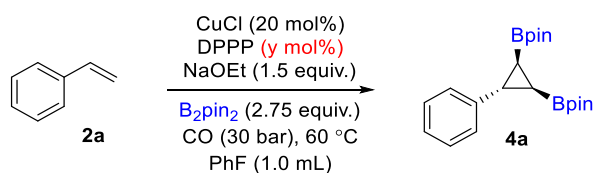

| Entry | DPPP (y mol%) | Yield of 4a (%)        |
|-------|---------------|------------------------|
| 1     | 20            | 52                     |
| 2     | 25            | 54                     |
| 3     | 30            | 64 (55% <sup>b</sup> ) |
| 4     | 35            | 57                     |
| 5     | 40            | 39                     |

[a] Reaction conditions: styrene (0.2 mmol), B<sub>2</sub>pin<sub>2</sub> (1.5 equiv.), CuCl (x mol%), DPPP (10 mol%), NaOEt (1.5 equiv.), CO (10 bar), PhF (1 mL), stirred at 60 °C for 24 h. Yields are determined by GC with hexadecane as an internal standard. [b] Isolated yield.

### 3.2 General Procedures for preparing alkenes.

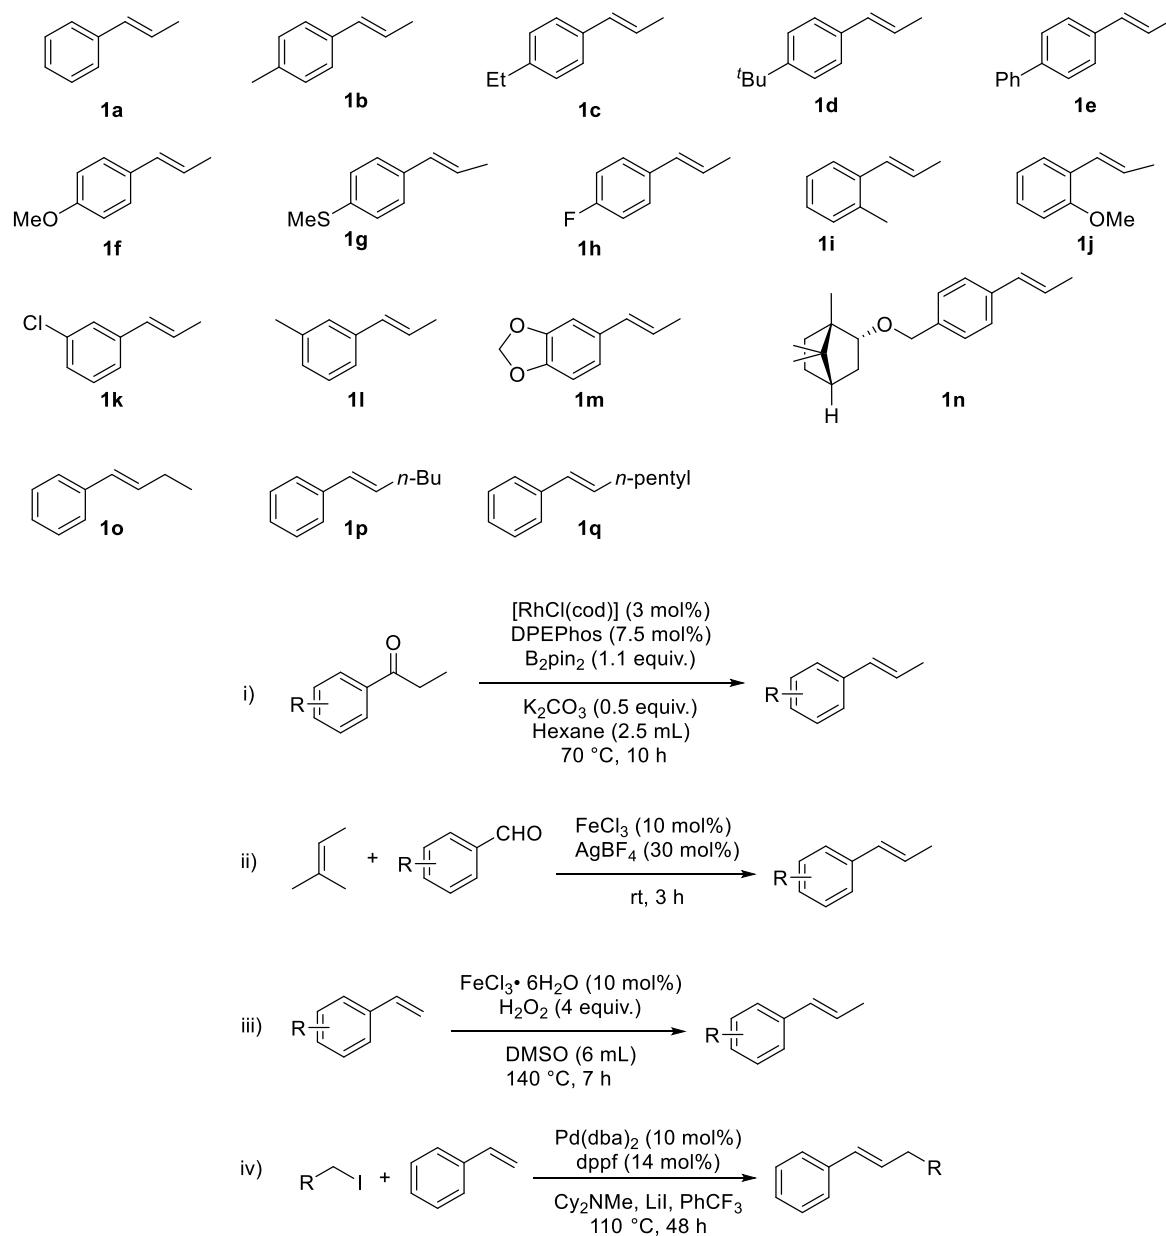

**Figure 1.** Preparation of substrates

Substrates **1a-1f**, **1h**, **1k**, **1m**, **1o** were prepared according to the reported literature (Figure 1, i).<sup>[1]</sup>

Substrates **1g**, **1i**, **1j** and **1l** were prepared according to the reported literature (Figure 1, ii).<sup>[2]</sup>

Substrate **1n** was prepared according to the known procedure. (Figure 1, iii).<sup>[3]</sup>

Substrates **1p** and **1q** were prepared according to the reported literature (Figure 1, iv).<sup>[4]</sup>

### 3.3 General Procedures A

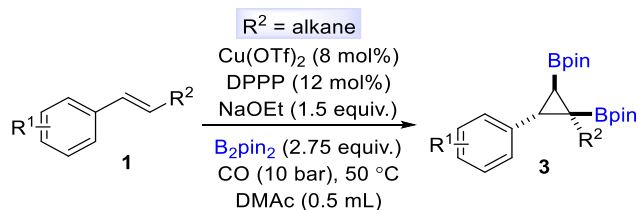

A dried 4 mL screw-cap vial equipped with a septum and a stirring bar was charged with  $\text{Cu(OTf)}_2$  (5.8 mg, 8 mol%), DPPPP (9.9 mg, 12 mol%),  $\text{B}_2\text{pin}_2$  (140 mg, 2.75 equiv.) and NaOEt (20.4 mg, 1.5 equiv.). The vial was sealed, connected to atmosphere with a small cannula, evacuated, and backfilled with argon three times. DMAc (0.5 mL) were added *via* syringe. To this suspension, internal olefins **1** (0.2 mmol) was added *via* Hamilton® syringe. Then the vial was placed on an alloy plate and transferred into a 300 mL stovetop autoclave (4560 series from Parr instrument company®). The autoclave was flushed one time with nitrogen (<10 bar) and three times with CO (<10 bar). The autoclave was then charged with CO (10 bar). The autoclave was then placed into an aluminum block on a magnetic stirrer. The reaction mixture was stirred (600 rpm) for 24 h at 50 °C. Then it was cooled to room temperature and the pressure was released carefully. The reaction purified by gradient column chromatography to yield product **3**.

### 3.4 General Procedures B

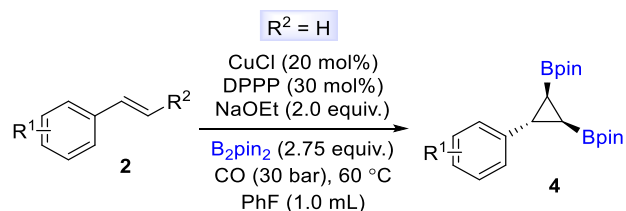

A dried 4 mL screw-cap vial equipped with a septum and a stirring bar was charged with CuCl (4.0 mg, 20 mol%), DPPPP (24.7 mg, 30 mol%),  $\text{B}_2\text{pin}_2$  (140 mg, 2.75 equiv.) and NaOEt (20.4 mg, 2.0 equiv.). The vial was sealed, connected to atmosphere with a small cannula, evacuated, and backfilled with argon three times. PhF (1.0 mL) were added *via* syringe. To this suspension, terminal olefine **2** (0.2 mmol) was added *via* Hamilton® syringe. Then the vial was placed on an alloy plate and transferred into a 300 mL stovetop autoclave (4560 series from Parr instrument company®). The autoclave was flushed one time with nitrogen (<10 bar) and three times with CO (<10 bar). The autoclave was then charged with CO (30 bar). The autoclave was then placed into an aluminum block on a magnetic stirrer. The reaction mixture was stirred (600 rpm) for 24 h at 60 °C. Then it was cooled to room temperature and the pressure was released carefully. The reaction purified by gradient column chromatography to yield product **4**.

## 4 NMR Spectra of the Products

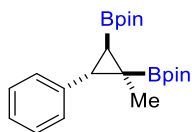

### 2,2'-(1-Methyl-3-phenylcyclopropane-1,2-diyl)bis(4,4,5,5-tetramethyl-1,3,2-dioxaborolane) (3a)

The title compound was prepared from (*E*)-prop-1-en-1-ylbenzene (23.6 mg, 0.2 mmol), according to general procedure A. The crude residue was purified by flash chromatography (pentane/EA = 50:1, *R*<sub>f</sub> = 0.20) to give the product as a white solid (46.8 mg, 61%). mp: 116-118 °C.

<sup>1</sup>H NMR (300 MHz, CDCl<sub>3</sub>) δ 7.26 – 7.13 (m, 5H), 2.51 (d, *J* = 7.4 Hz, 1H), 1.26 (d, *J* = 3.2 Hz, 24H), 0.81 (s, 3H), 0.39 (d, *J* = 7.4 Hz, 1H). <sup>13</sup>C NMR (75 MHz, CDCl<sub>3</sub>) δ 139.2, 129.4, 127.6, 125.7, 83.2, 83.1, 31.7, 25.0, 24.9, 24.8, 24.6, 17.4. <sup>11</sup>B NMR (96 MHz, CDCl<sub>3</sub>) δ 32.6. HRMS (ESI-TOF): calcd for [M+Na]<sup>+</sup> C<sub>22</sub>H<sub>34</sub><sup>10</sup>B<sup>11</sup>BO<sub>4</sub> 406.2579, found: 406.2584.

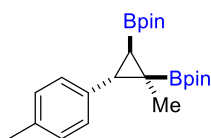

### 2,2'-(1-Methyl-3-(*p*-tolyl)cyclopropane-1,2-diyl)bis(4,4,5,5-tetramethyl-1,3,2-dioxaborolane) (3b)

The title compound was prepared from (*E*)-1-methyl-4-(prop-1-en-1-yl)benzene (26.4 mg, 0.2 mmol), according to general procedure A. The crude residue was purified by flash chromatography (pentane/EA = 50:1, *R*<sub>f</sub> = 0.20) to give the product as a colorless oil (45.4 mg, 57%).

<sup>1</sup>H NMR (300 MHz, CDCl<sub>3</sub>) δ 7.07 (t, *J* = 3.1 Hz, 4H), 2.47 (d, *J* = 7.4 Hz, 1H), 2.30 (s, 3H), 1.26 (d, *J* = 3.6 Hz, 24H), 0.80 (s, 3H), 0.35 (d, *J* = 7.4 Hz, 1H). <sup>13</sup>C NMR (75 MHz, CDCl<sub>3</sub>) δ 136.1, 135.1, 129.3, 128.3, 83.2, 83.1, 31.4, 25.1, 25.0, 24.8, 24.7, 21.0, 17.5. <sup>11</sup>B NMR (96 MHz, CDCl<sub>3</sub>) δ 32.5. HRMS (ESI-TOF): calcd for [M+Na]<sup>+</sup> C<sub>23</sub>H<sub>36</sub><sup>10</sup>B<sup>11</sup>BO<sub>4</sub> 420.2735, found: 420.2740.

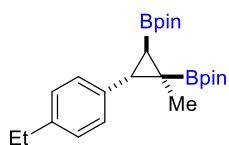

### 2,2'-(3-(4-Ethylphenyl)-1-methylcyclopropane-1,2-diyl)bis(4,4,5,5-tetramethyl-1,3,2-dioxaborolane) (3c)

The title compound was prepared from (*E*)-1-ethyl-4-(prop-1-en-1-yl)benzene (29.2 mg, 0.2 mmol), according to general procedure A. The crude residue was purified by flash chromatography (pentane/EA = 50:1, *R*<sub>f</sub> = 0.20) to give the product as a colorless oil (43 mg, 53%).

<sup>1</sup>H NMR (300 MHz, CDCl<sub>3</sub>) δ 7.13 – 7.05 (m, 4H), 2.59 (t, *J* = 7.6 Hz, 2H), 2.48 (d, *J* = 7.4 Hz, 1H), 1.27 – 1.24 (m, 24H), 1.20 (d, *J* = 7.6 Hz, 3H), 0.81 (s, 3H), 0.36 (d, *J* = 7.4 Hz, 1H). <sup>13</sup>C NMR (101 MHz, CDCl<sub>3</sub>) δ 141.5, 136.3, 129.3, 127.1, 83.2, 83.1, 31.5, 28.4, 25.0, 24.9, 24.7, 24.6, 17.4, 15.6. <sup>11</sup>B NMR (128 MHz, CDCl<sub>3</sub>) δ 32.4. HRMS (ESI-TOF): calcd for [M+Na]<sup>+</sup> C<sub>24</sub>H<sub>38</sub><sup>10</sup>B<sup>11</sup>BO<sub>4</sub> 434.2892, found: 434.2895.

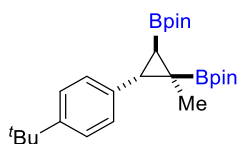

**2,2'-(3-(4-(*tert*-Butyl)phenyl)-1-methylcyclopropane-1,2-diyl)bis(4,4,5,5-tetramethyl-1,3,2-dioxaborolane) (3d)**

The title compound was prepared from (*E*)-1-(*tert*-butyl)-4-(prop-1-en-1-yl)benzene (34.8 mg, 0.2 mmol), according to general procedure A. The crude residue was purified by flash chromatography (pentane/EA = 50:1,  $R_f$  = 0.20) to give the product as a colorless oil (40.5 mg, 46%).

$^1\text{H NMR}$  (300 MHz,  $\text{CDCl}_3$ )  $\delta$  7.21 – 7.17 (m, 2H), 7.05 (d,  $J$  = 8.2 Hz, 2H), 2.41 (d,  $J$  = 7.4 Hz, 1H), 1.22 (s, 9H), 1.19 (s, 12H), 1.18 (d,  $J$  = 3.4 Hz, 12H), 0.77 (s, 3H), 0.30 (d,  $J$  = 7.4 Hz, 1H).  $^{13}\text{C NMR}$  (75 MHz,  $\text{CDCl}_3$ )  $\delta$  148.4, 136.1, 128.9, 124.5, 83.2, 83.1, 34.3, 31.5, 31.4, 25.1, 25.0, 24.8, 24.7, 17.4.  $^{11}\text{B NMR}$  (96 MHz,  $\text{CDCl}_3$ )  $\delta$  32.4. **HRMS (ESI-TOF):** calcd for  $[\text{M}+\text{Na}]^+$   $\text{C}_{26}\text{H}_{42}^{10}\text{B}^{11}\text{BO}_4$  462.3205, found: 462.3209.

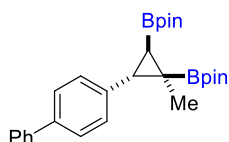

**2,2'-(3-([1,1'-Biphenyl]-4-yl)-1-methylcyclopropane-1,2-diyl)bis(4,4,5,5-tetramethyl-1,3,2-dioxaborolane) (3e)**

The title compound was prepared from (*E*)-4-(prop-1-en-1-yl)-1,1'-biphenyl (38.8 mg, 0.2 mmol), according to general procedure A. The crude residue was purified by flash chromatography (pentane/EA = 50:1,  $R_f$  = 0.20) to give the product as a colorless oil (45.1 mg, 49%).

$^1\text{H NMR}$  (300 MHz,  $\text{CDCl}_3$ )  $\delta$  7.60 – 7.56 (m, 2H), 7.52 – 7.47 (m, 2H), 7.44 – 7.39 (m, 2H), 7.33 – 7.27 (m, 2H), 7.25 (d,  $J$  = 0.7 Hz, 1H), 2.55 (d,  $J$  = 7.4 Hz, 1H), 1.29 – 1.26 (m, 24H), 0.86 (s, 3H), 0.43 (d,  $J$  = 7.4 Hz, 1H).  $^{13}\text{C NMR}$  (75 MHz,  $\text{CDCl}_3$ )  $\delta$  141.1, 138.5, 138.5, 129.8, 128.6, 126.9, 126.9, 126.3, 83.3, 83.2, 31.5, 25.0, 25.0, 24.8, 24.6, 17.5.  $^{11}\text{B NMR}$  (96 MHz,  $\text{CDCl}_3$ )  $\delta$  32.9. **HRMS (ESI-TOF):** calcd for  $[\text{M}+\text{Na}]^+$   $\text{C}_{28}\text{H}_{38}^{10}\text{B}^{11}\text{BO}_4$  482.2892, found: 482.2894.

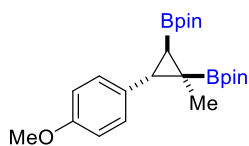

**2,2'-(3-(4-Methoxyphenyl)-1-methylcyclopropane-1,2-diyl)bis(4,4,5,5-tetramethyl-1,3,2-dioxaborolane) (3f)**

The title compound was prepared from (*E*)-1-methoxy-4-(prop-1-en-1-yl)benzene (29.6 mg, 0.2 mmol), according to general procedure A. The crude residue was purified by flash chromatography (pentane/EA = 20:1,  $R_f$  = 0.20) to give the product as a colorless oil (40.5 mg, 49%).

$^1\text{H NMR}$  (300 MHz,  $\text{CDCl}_3$ )  $\delta$  7.13 – 7.09 (m, 2H), 6.81 – 6.76 (m, 2H), 3.78 (s, 3H), 2.45 (d,  $J$  = 7.4 Hz, 1H), 1.26 (d,  $J$  = 2.4 Hz, 24H), 0.79 (s, 3H), 0.30 (d,  $J$  = 7.4 Hz, 1H).  $^{13}\text{C NMR}$  (75 MHz,  $\text{CDCl}_3$ )  $\delta$  157.7, 131.3, 130.4, 113.1, 83.2, 83.2, 55.2, 31.0, 25.1, 25.0, 24.8, 24.6, 17.5.  $^{11}\text{B NMR}$  (96 MHz,  $\text{CDCl}_3$ )  $\delta$  32.5. **HRMS (ESI-TOF):** calcd for  $[\text{M}+\text{Na}]^+$   $\text{C}_{23}\text{H}_{36}^{10}\text{B}^{11}\text{BO}_5$  436.2684, found: 436.2691.

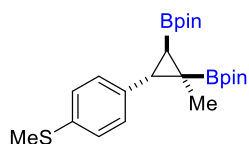

**2,2'-(1-Methyl-3-(4-(methylthio)phenyl)cyclopropane-1,2-diyl)bis(4,4,5,5-tetramethyl-1,3,2-dioxaborolane) (3g)**

The title compound was prepared from (*E*)-methyl(4-(prop-1-en-1-yl)phenyl)sulfane (32.8 mg, 0.2 mmol), according to general procedure A. The crude residue was purified by flash chromatography (pentane/EA = 30:1, R<sub>f</sub> = 0.20) to give the product as a colorless oil (37.8 mg, 44%).

<sup>1</sup>H NMR (300 MHz, CDCl<sub>3</sub>) δ 7.15 (dd, *J* = 8.7, 6.4 Hz, 4H), 2.45 (d, *J* = 7.4 Hz, 1H), 2.45 (s, 3H), 1.26 – 1.25 (m, 24H), 0.79 (s, 3H), 0.34 (d, *J* = 7.4 Hz, 1H). <sup>13</sup>C NMR (75 MHz, CDCl<sub>3</sub>) δ 136.5, 135.1, 130.0, 126.4, 83.3, 83.2, 31.3, 25.0, 25.0, 24.8, 24.6, 17.5, 16.3. <sup>11</sup>B NMR (96 MHz, CDCl<sub>3</sub>) δ 31.26. HRMS (ESI-TOF): calcd for [M+Na]<sup>+</sup> C<sub>23</sub>H<sub>36</sub><sup>10</sup>B<sup>11</sup>BO<sub>4</sub>S 452.2456, found: 452.2456.

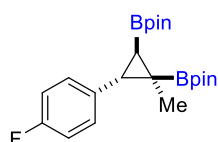

**2,2'-(3-(4-Fluorophenyl)-1-methylcyclopropane-1,2-diyl)bis(4,4,5,5-tetramethyl-1,3,2-dioxaborolane) (3h)**

The title compound was prepared from (*E*)-1-fluoro-4-(prop-1-en-1-yl)benzene (27.2 mg, 0.2 mmol), according to general procedure A. The crude residue was purified by flash chromatography (pentane/EA = 50:1, R<sub>f</sub> = 0.20) to give the product as a colorless oil (43.4 mg, 54%).

<sup>1</sup>H NMR (300 MHz, CDCl<sub>3</sub>) δ 7.16 – 7.11 (m, 2H), 6.95 – 6.89 (m, 2H), 2.45 (d, *J* = 7.4 Hz, 1H), 1.26 (d, *J* = 1.4 Hz, 24H), 0.77 (s, 3H), 0.31 (d, *J* = 7.4 Hz, 1H). <sup>13</sup>C NMR (75 MHz, CDCl<sub>3</sub>) δ 161.3 (d, *J* = 243.3 Hz), 134.9 (d, *J* = 3.0 Hz), 130.8 (d, *J* = 7.8 Hz), 114.4 (d, *J* = 21.1 Hz), 83.3, 83.2, 30.9, 25.0, 25.0, 24.8, 24.6, 17.5. <sup>11</sup>B NMR (96 MHz, CDCl<sub>3</sub>) δ 33.4. HRMS (ESI-TOF): calcd for [M+Na]<sup>+</sup> C<sub>22</sub>H<sub>33</sub><sup>10</sup>B<sup>11</sup>BO<sub>4</sub>F 424.2485, found: 424.2483.

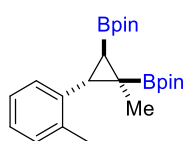

**2,2'-(1-Methyl-3-(m-tolyl)cyclopropane-1,2-diyl)bis(4,4,5,5-tetramethyl-1,3,2-dioxaborolane) (3i)**

The title compound was prepared from (*E*)-1-methyl-3-(prop-1-en-1-yl)benzene (26.4 mg, 0.2 mmol), according to general procedure A. The crude residue was purified by flash chromatography (pentane/EA = 50:1, R<sub>f</sub> = 0.20) to give the product as a white solid (42.9 mg, 54%). mp: 88-90 °C.

<sup>1</sup>H NMR (300 MHz, CDCl<sub>3</sub>) δ 7.13 (td, *J* = 7.3, 1.1 Hz, 1H), 7.03 – 6.93 (m, 3H), 2.48 (d, *J* = 7.4 Hz, 1H), 2.31 (s, 3H), 1.28 – 1.24 (m, 24H), 0.81 (s, 3H), 0.38 (d, *J* = 7.4 Hz, 1H). <sup>13</sup>C NMR (75 MHz, CDCl<sub>3</sub>) δ 139.1, 137.1, 130.2, 127.5, 126.5, 126.5, 83.2, 83.2, 31.7, 25.1, 25.0, 24.8, 24.7, 21.4, 17.4. <sup>11</sup>B NMR (96 MHz, CDCl<sub>3</sub>) δ 32.2. HRMS (ESI-TOF): calcd for [M+Na]<sup>+</sup> C<sub>23</sub>H<sub>36</sub><sup>10</sup>B<sup>11</sup>BO<sub>4</sub> 420.2735, found: 420.2737.



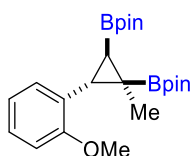

**2,2'-(3-(2-Methoxyphenyl)-1-methylcyclopropane-1,2-diyl)bis(4,4,5,5-tetramethyl-1,3,2-dioxaborolane) (3j)**

The title compound was prepared from (*E*)-1-methoxy-2-(prop-1-en-1-yl)benzene (29.6 mg, 0.2 mmol), according to general procedure A. The crude residue was purified by flash chromatography (pentane/EA = 50:1, *R*<sub>f</sub> = 0.20) to give the product as a colorless oil (33.1 mg, 40%).

<sup>1</sup>H NMR (300 MHz, CDCl<sub>3</sub>) δ 7.18 – 7.12 (m, 1H), 7.03 (dd, *J* = 7.4, 0.9 Hz, 1H), 6.86 – 6.78 (m, 2H), 3.79 (s, 3H), 2.46 (d, *J* = 7.9 Hz, 1H), 1.27 – 1.26 (m, 24H), 0.70 (s, 3H), 0.33 (d, *J* = 7.9 Hz, 1H). <sup>13</sup>C NMR (75 MHz, CDCl<sub>3</sub>) δ 159.4, 129.6, 128.3, 126.9, 119.6, 109.8, 83.5, 83.1, 55.4, 28.0, 25.0, 25.0, 24.9, 24.4, 17.3. <sup>11</sup>B NMR (96 MHz, CDCl<sub>3</sub>) δ 30.4. HRMS (ESI-TOF): calcd for [M+Na]<sup>+</sup> C<sub>23</sub>H<sub>36</sub><sup>10</sup>B<sup>11</sup>BO<sub>5</sub> 436.2684, found: 436.2692.

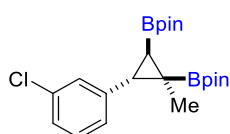

**2,2'-(3-(3-Chlorophenyl)-1-methylcyclopropane-1,2-diyl)bis(4,4,5,5-tetramethyl-1,3,2-dioxaborolane) (3k)**

The title compound was prepared from (*E*)-1-chloro-3-(prop-1-en-1-yl)benzene (30.4 mg, 0.2 mmol), according to general procedure A. The crude residue was purified by flash chromatography (pentane/EA = 50:1, *R*<sub>f</sub> = 0.20) to give the product as a colorless oil (35.1 mg, 42%).

<sup>1</sup>H NMR (300 MHz, CDCl<sub>3</sub>) δ 7.19 – 7.17 (m, 1H), 7.17 – 7.09 (m, 2H), 7.09 – 7.05 (m, 1H), 2.46 (d, *J* = 7.4 Hz, 1H), 1.26 (d, *J* = 2.5 Hz, 24H), 0.80 (s, 3H), 0.36 (d, *J* = 7.4 Hz, 1H). <sup>13</sup>C NMR (75 MHz, CDCl<sub>3</sub>) δ 141.6, 129.5, 128.8, 127.7, 126.0, 125.9, 83.4, 83.3, 31.3, 25.0, 25.0, 24.8, 24.6, 17.5. <sup>11</sup>B NMR (96 MHz, CDCl<sub>3</sub>) δ 32.8. HRMS (ESI-TOF): calcd for [M+Na]<sup>+</sup> C<sub>22</sub>H<sub>33</sub><sup>10</sup>B<sub>2</sub>ClO<sub>4</sub> 439.2223, found: 439.2216.

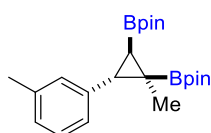

**2,2'-(1-Methyl-3-(*o*-tolyl)cyclopropane-1,2-diyl)bis(4,4,5,5-tetramethyl-1,3,2-dioxaborolane) (3l)**

The title compound was prepared from (*E*)-1-methyl-2-(prop-1-en-1-yl)benzene (26.4 mg, 0.2 mmol), according to general procedure A. The crude residue was purified by flash chromatography (pentane/EA = 50:1, *R*<sub>f</sub> = 0.20) to give the product as a colorless oil (42.9 mg, 54%).

<sup>1</sup>H NMR (300 MHz, CDCl<sub>3</sub>) δ 7.14 – 7.06 (m, 4H), 2.36 (d, *J* = 7.7 Hz, 1H), 2.31 (s, 3H), 1.27 (s, 12H), 1.26 (d, *J* = 3.1 Hz, 12H), 0.69 (s, 3H), 0.42 (d, *J* = 7.7 Hz, 1H). <sup>13</sup>C NMR (75 MHz, CDCl<sub>3</sub>) δ 138.6, 137.8, 129.1, 128.9, 125.9, 125.1, 83.2, 83.1, 31.0, 25.1, 25.0, 24.9, 24.5, 19.5, 17.2. <sup>11</sup>B NMR (96 MHz, CDCl<sub>3</sub>) δ 32.8. HRMS (ESI-TOF): calcd for [M+Na]<sup>+</sup> C<sub>23</sub>H<sub>36</sub><sup>10</sup>B<sup>11</sup>BO<sub>4</sub> 420.2735, found: 420.2733.

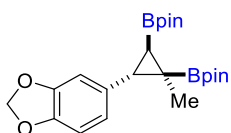

**2,2'-(3-(Benzo[*d*][1,3]dioxol-5-yl)-1-methylcyclopropane-1,2-diyl)bis(4,4,5,5-tetramethyl-1,3,2-dioxaborolane) (3m)**

The title compound was prepared from (*E*)-5-(prop-1-en-1-yl)benzo[*d*][1,3]dioxole (32.4 mg, 0.2 mmol), according to general procedure A. The crude residue was purified by flash chromatography (pentane/EA = 20:1, *R*<sub>f</sub> = 0.20) to give the product as a white solid (46.2 mg, 54%). mp: 120-122 °C.

<sup>1</sup>H NMR (300 MHz, CDCl<sub>3</sub>) δ 6.71 – 6.67 (m, 2H), 6.64 (ddd, *J* = 8.2, 1.5, 0.7 Hz, 1H), 5.92 – 5.88 (m, 2H), 2.42 (d, *J* = 7.4 Hz, 1H), 1.26 (s, 24H), 0.80 (s, 3H), 0.27 (d, *J* = 7.4 Hz, 1H). <sup>13</sup>C NMR (75 MHz, CDCl<sub>3</sub>) δ 147.1, 145.6, 133.2, 122.4, 110.1, 107.5, 100.7, 83.2, 83.2, 31.5, 25.0, 25.0, 24.8, 24.6, 17.5. <sup>11</sup>B NMR (96 MHz, CDCl<sub>3</sub>) δ 32.4. HRMS (ESI-TOF): calcd for [M+Na]<sup>+</sup> C<sub>23</sub>H<sub>34</sub><sup>10</sup>B<sup>11</sup>BO<sub>6</sub> 450.2477, found: 450.2483.

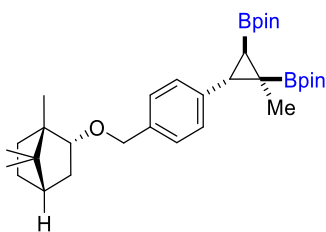

**2,2'-(1-Methyl-3-(4-(((1S,2R,4S)-1,7,7-trimethylbicyclo[2.2.1]heptan-2-yl)oxy)methyl)phenyl)cyclopropane-1,2-diyl)bis(4,4,5,5-tetramethyl-1,3,2-dioxaborolane) (3n)**

The title compound was prepared from (1*S*,2*R*,4*S*)-1,7,7-trimethyl-2-((4-vinylbenzyl)oxy)bicyclo[2.2.1]heptane (54.0 mg, 0.2 mmol), according to general procedure A. The crude residue was purified by flash chromatography (pentane/EA = 50:1, *R*<sub>f</sub> = 0.20) to give the product as a colorless oil (37.4 mg, 34%).

<sup>1</sup>H NMR (300 MHz, CDCl<sub>3</sub>) δ 7.23 – 7.13 (m, 4H), 4.56 – 4.38 (m, 2H), 3.66 (d, *J* = 9.4 Hz, 1H), 2.50 (d, *J* = 7.4 Hz, 1H), 2.15 – 2.04 (m, 2H), 1.66 (dt, *J* = 21.1, 3.9 Hz, 4H), 1.26 (d, *J* = 3.1 Hz, 24H), 0.87 (d, *J* = 1.0 Hz, 3H), 0.84 – 0.80 (m, 9H), 0.38 (d, *J* = 7.4 Hz, 1H). <sup>13</sup>C NMR (75 MHz, CDCl<sub>3</sub>) δ 138.1, 136.9, 129.3, 126.7, 84.1, 83.2, 83.2, 71.5, 49.3, 47.8, 45.1, 36.1, 31.6, 28.3, 26.8, 25.1, 25.0, 24.8, 24.6, 19.8, 18.9, 17.5, 14.0. <sup>11</sup>B NMR (96 MHz, CDCl<sub>3</sub>) δ 32.7. HRMS (ESI-TOF): calcd for [M+Na]<sup>+</sup> C<sub>33</sub>H<sub>52</sub><sup>10</sup>B<sup>11</sup>BO<sub>5</sub> 572.3937, found: 572.3947.

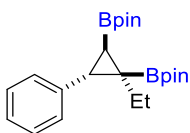

**2,2'-(1-Ethyl-3-phenylcyclopropane-1,2-diyl)bis(4,4,5,5-tetramethyl-1,3,2-dioxaborolane) (3o)**

The title compound was prepared from (*E*)-but-1-en-1-ylbenzene (26.4 mg, 0.2 mmol), according to general procedure A. The crude residue was purified by flash chromatography (pentane/EA = 50:1, *R*<sub>f</sub> = 0.20) to give the product as a white solid (39.0 mg, 49%). mp: 85-87 °C.

<sup>1</sup>H NMR (300 MHz, CDCl<sub>3</sub>) δ 7.23 (d, *J* = 4.4 Hz, 4H), 7.14 (ddd, *J* = 8.1, 4.9, 3.6 Hz, 1H), 2.56 (d, *J* = 7.4 Hz, 1H), 1.28 (s, 12H), 1.25 (d, *J* = 3.9 Hz, 12H), 1.19 – 1.02 (m, 2H), 0.72 (t, *J* = 7.3 Hz, 3H), 0.43 (d, *J* = 7.4 Hz, 1H). <sup>13</sup>C NMR (75 MHz, CDCl<sub>3</sub>) δ 139.3, 129.3, 127.5, 125.6, 83.1, 83.1, 31.9, 25.6, 25.1, 25.0, 24.8, 24.6, 13.1.

**<sup>11</sup>B NMR (96 MHz, CDCl<sub>3</sub>)** δ 32.5. **HRMS (ESI-TOF):** calcd for [M+Na]<sup>+</sup> C<sub>23</sub>H<sub>36</sub><sup>10</sup>B<sup>11</sup>BO<sub>4</sub> 420.2735, found: 420.2731.

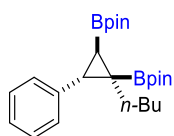

### 2,2'-(1-Butyl-3-phenylcyclopropane-1,2-diyl)bis(4,4,5,5-tetramethyl-1,3,2-dioxaborolane) (3p)

The title compound was prepared from (*E*)-hex-1-en-1-ylbenzene (32 mg, 0.2 mmol), according to general procedure A. The crude residue was purified by flash chromatography (pentane/EA = 50:1, R<sub>f</sub> = 0.20) to give the product as a colorless oil (41.7 mg, 49%).

**<sup>1</sup>H NMR (300 MHz, CDCl<sub>3</sub>)** δ 7.22 (d, *J* = 4.3 Hz, 4H), 7.17 – 7.12 (m, 1H), 2.53 (d, *J* = 7.4 Hz, 1H), 1.28 (s, 12H), 1.25 (d, *J* = 4.1 Hz, 12H), 1.06 (m, 6H), 0.65 (t, *J* = 7.2 Hz, 3H), 0.43 (d, *J* = 7.4 Hz, 1H). **<sup>13</sup>C NMR (75 MHz, CDCl<sub>3</sub>)** δ 139.3, 129.3, 127.5, 125.6, 83.1, 32.2, 31.8, 31.0, 25.2, 25.0, 24.9, 24.6, 22.8, 13.9. **<sup>11</sup>B NMR (96 MHz, CDCl<sub>3</sub>)** δ 33.0.

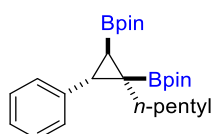

### 2,2'-(1-Pentyl-3-phenylcyclopropane-1,2-diyl)bis(4,4,5,5-tetramethyl-1,3,2-dioxaborolane) (3q)

The title compound was prepared from (*E*)-hept-1-en-1-ylbenzene (34.8 mg, 0.2 mmol), according to general procedure A. The crude residue was purified by flash chromatography (pentane/EA = 50:1, R<sub>f</sub> = 0.20) to give the product as a colorless oil (36.1 mg, 41%).

**<sup>1</sup>H NMR (300 MHz, CDCl<sub>3</sub>)** δ 7.22 (d, *J* = 4.2 Hz, 4H), 7.17 – 7.11 (m, 1H), 2.53 (d, *J* = 7.4 Hz, 1H), 1.27 (s, 12H), 1.25 (d, *J* = 4.2 Hz, 12H), 1.13 – 0.84 (m, 8H), 0.75 – 0.66 (m, 3H), 0.43 (d, *J* = 7.4 Hz, 1H). **<sup>13</sup>C NMR (75 MHz, CDCl<sub>3</sub>)** δ 139.3, 129.3, 127.5, 125.5, 83.1, 83.1, 32.5, 32.0, 31.7, 28.3, 25.2, 25.0, 24.9, 24.6, 22.3, 13.9. **<sup>11</sup>B NMR (96 MHz, CDCl<sub>3</sub>)** δ 33.1. **HRMS (ESI-TOF):** calcd for [M+Na]<sup>+</sup> C<sub>26</sub>H<sub>42</sub><sup>10</sup>B<sup>11</sup>BO<sub>4</sub> 462.3205, found: 462.3211.

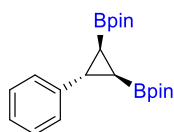

### 2,2'-(3-Phenylcyclopropane-1,2-diyl)bis(4,4,5,5-tetramethyl-1,3,2-dioxaborolane) (4a)

The title compound was prepared from styrene (20.8 mg, 0.2 mmol), according to general procedure B. The crude residue was purified by flash chromatography (pentane/EA = 50:1, R<sub>f</sub> = 0.20) to give the product as a white solid (40.7 mg, 55%). mp: 124-126 °C.

**<sup>1</sup>H NMR (300 MHz, CDCl<sub>3</sub>)** δ 7.25 – 7.20 (m, 2H), 7.11 (td, *J* = 6.8, 1.5 Hz, 3H), 2.27 (t, *J* = 6.4 Hz, 1H), 1.26 (s, 24H), 0.58 (d, *J* = 6.4 Hz, 2H). **<sup>13</sup>C NMR (75 MHz, CDCl<sub>3</sub>)** δ 143.7, 128.2, 125.5, 125.5, 83.3, 25.9, 25.0, 24.8. **<sup>11</sup>B NMR (96 MHz, CDCl<sub>3</sub>)** δ 31.98. **HRMS (ESI-TOF):** calcd for [M+Na]<sup>+</sup> C<sub>21</sub>H<sub>32</sub><sup>10</sup>B<sup>11</sup>BO<sub>4</sub> 392.2422, found: 392.2425.

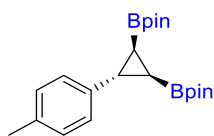

**2,2'-(3-(*p*-Tolyl)cyclopropane-1,2-diyl)bis(4,4,5,5-tetramethyl-1,3,2-dioxaborolane) (4b)**

The title compound was prepared from 1-methyl-4-vinylbenzene (23.6 mg, 0.2 mmol), according to general procedure B. The crude residue was purified by flash chromatography (pentane/EA = 50:1,  $R_f$  = 0.20) to give the product as a colorless oil (33.0 mg, 43%).

$^1\text{H NMR}$  (400 MHz,  $\text{CDCl}_3$ )  $\delta$  7.05 – 6.98 (m, 4H), 2.28 (s, 3H), 2.24 (t,  $J$  = 6.4 Hz, 1H), 1.25 (s, 24H), 0.54 (d,  $J$  = 6.4 Hz, 2H).  $^{13}\text{C NMR}$  (101 MHz,  $\text{CDCl}_3$ )  $\delta$  140.6, 135.0, 128.8, 125.4, 83.2, 25.6, 25.0, 24.7, 20.9.  $^{11}\text{B NMR}$  (128 MHz,  $\text{CDCl}_3$ )  $\delta$  32.3. **HRMS (ESI-TOF)**: calcd for  $[\text{M}+\text{Na}]^+$   $\text{C}_{22}\text{H}_{34}^{10}\text{B}^{11}\text{BO}_4$  406.2579, found: 406.2576.

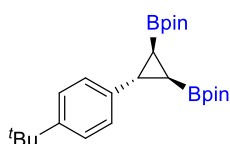

**2,2'-(3-(4-(*tert*-Butyl)phenyl)cyclopropane-1,2-diyl)bis(4,4,5,5-tetramethyl-1,3,2-dioxaborolane) (4c)**

The title compound was prepared from 1-(*tert*-butyl)-4-vinylbenzene (32 mg, 0.2 mmol), according to general procedure B. The crude residue was purified by flash chromatography (pentane/EA = 50:1,  $R_f$  = 0.20) to give the product as a colorless oil (45 mg, 53%).

$^1\text{H NMR}$  (400 MHz,  $\text{CDCl}_3$ )  $\delta$  7.26 (s, 2H), 7.04 (d,  $J$  = 8.3 Hz, 2H), 2.26 (t,  $J$  = 6.4 Hz, 1H), 1.28 (s, 9H), 1.25 (s, 24H), 0.57 (d,  $J$  = 6.4 Hz, 2H).  $^{13}\text{C NMR}$  (101 MHz,  $\text{CDCl}_3$ )  $\delta$  148.4, 140.7, 125.1, 125.0, 83.2, 34.3, 31.4, 25.6, 25.0, 24.7.  $^{11}\text{B NMR}$  (128 MHz,  $\text{CDCl}_3$ )  $\delta$  31.9. **HRMS (ESI-TOF)**: calcd for  $[\text{M}+\text{Na}]^+$   $\text{C}_{25}\text{H}_{40}^{10}\text{B}^{11}\text{BO}_4$  448.3048, found: 448.3053.

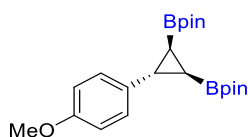

**2,2'-(3-(4-Methoxyphenyl)cyclopropane-1,2-diyl)bis(4,4,5,5-tetramethyl-1,3,2-dioxaborolane) (4d)**

The title compound was prepared from 1-methoxy-4-vinylbenzene (26.8 mg, 0.2 mmol), according to general procedure B. The crude residue was purified by flash chromatography (pentane/EA = 50:1,  $R_f$  = 0.20) to give the product as a colorless oil (40.8 mg, 51%).

$^1\text{H NMR}$  (400 MHz,  $\text{CDCl}_3$ )  $\delta$  7.02 (d,  $J$  = 8.6 Hz, 2H), 6.78 (d,  $J$  = 8.8 Hz, 2H), 3.76 (s, 3H), 2.23 (t,  $J$  = 6.4 Hz, 1H), 1.25 (s, 24H), 0.50 (d,  $J$  = 6.5 Hz, 2H).  $^{13}\text{C NMR}$  (101 MHz,  $\text{CDCl}_3$ )  $\delta$  157.6, 135.7, 126.5, 113.7, 83.2, 55.3, 25.3, 25.0, 24.7.  $^{11}\text{B NMR}$  (128 MHz,  $\text{CDCl}_3$ )  $\delta$  30.3. **HRMS (ESI-TOF)**: calcd for  $[\text{M}+\text{Na}]^+$   $\text{C}_{22}\text{H}_{34}^{10}\text{B}^{11}\text{BO}_5$  422.2527, found: 422.2532.

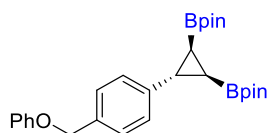

**2,2'-(3-(4-(Phoxymethyl)phenyl)cyclopropane-1,2-diyl)bis(4,4,5,5-tetramethyl-1,3,2-dioxaborolane) (4e)**

The title compound was prepared from 1-(phoxymethyl)-4-vinylbenzene (42 mg, 0.2 mmol), according to general procedure B. The crude residue was purified by flash chromatography (pentane/EA = 50:1, R<sub>f</sub> = 0.20) to give the product as a white solid (44.7 mg, 47%). mp: 120-122 °C.

<sup>1</sup>H NMR (400 MHz, CDCl<sub>3</sub>) δ 7.43 – 7.34 (m, 5H), 7.02 (d, *J* = 8.6 Hz, 2H), 6.85 (d, *J* = 8.8 Hz, 2H), 5.03 (s, 2H), 2.23 (t, *J* = 6.4 Hz, 1H), 1.25 (s, 24H), 0.50 (d, *J* = 6.4 Hz, 2H). <sup>13</sup>C NMR (101 MHz, CDCl<sub>3</sub>) δ 156.8, 137.2, 136.0, 128.5, 127.8, 127.4, 126.5, 114.7, 83.2, 70.1, 25.3, 25.0, 24.7. <sup>11</sup>B NMR (128 MHz, CDCl<sub>3</sub>) δ 30.5. HRMS (ESI-TOF): calcd for [M+Na]<sup>+</sup> C<sub>28</sub>H<sub>38</sub><sup>10</sup>B<sup>11</sup>BO<sub>5</sub> 498.2841, found: 498.2827.

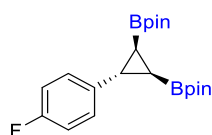

**2,2'-(3-(4-Fluorophenyl)cyclopropane-1,2-diyl)bis(4,4,5,5-tetramethyl-1,3,2-dioxaborolane) (4f)**

The title compound was prepared from 1-fluoro-4-vinylbenzene (24.4 mg, 0.2 mmol), according to general procedure B. The crude residue was purified by flash chromatography (pentane/EA = 50:1, R<sub>f</sub> = 0.20) to give the product as a white solid (44.2 mg, 57%). mp: 108-110 °C.

<sup>1</sup>H NMR (300 MHz, CDCl<sub>3</sub>) δ 7.06 – 7.01 (m, 2H), 6.92 (d, *J* = 8.8 Hz, 2H), 2.24 (t, *J* = 6.4 Hz, 1H), 1.26 (s, 24H), 0.51 (d, *J* = 6.4 Hz, 2H). <sup>13</sup>C NMR (75 MHz, CDCl<sub>3</sub>) δ 157.8 (d, *J* = 258.1 Hz), 139.2 (d, *J* = 2.7 Hz), 126.9 (d, *J* = 7.9 Hz), 114.9 (d, *J* = 21.3 Hz), 83.3, 25.2, 25.0, 24.7. <sup>11</sup>B NMR (96 MHz, CDCl<sub>3</sub>) δ 32.1. <sup>19</sup>F NMR (282 MHz, CDCl<sub>3</sub>) δ -118.09. HRMS (ESI-TOF): calcd for [M+Na]<sup>+</sup> C<sub>21</sub>H<sub>31</sub><sup>10</sup>B<sub>2</sub>O<sub>4</sub>F 409.2362, found: 409.2366.

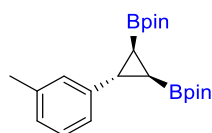

**2,2'-(3-(*m*-Tolyl)cyclopropane-1,2-diyl)bis(4,4,5,5-tetramethyl-1,3,2-dioxaborolane) (4g)**

The title compound was prepared from 1-methyl-3-vinylbenzene (23.6 mg, 0.2 mmol), according to general procedure B. The crude residue was purified by flash chromatography (pentane/EA = 50:1, R<sub>f</sub> = 0.20) to give the product as a white solid (39.2 mg, 51%). mp: 112-114 °C.

<sup>1</sup>H NMR (300 MHz, CDCl<sub>3</sub>) δ 7.14 – 7.10 (m, 1H), 7.04 (s, 1H), 6.94 – 6.90 (m, 2H), 2.28 (s, 3H), 2.24 (t, *J* = 6.4 Hz, 1H), 1.25 (s, 24H), 0.57 (d, *J* = 6.4 Hz, 2H). <sup>13</sup>C NMR (75 MHz, CDCl<sub>3</sub>) δ 143.7, 137.7, 128.1, 126.5, 126.3, 122.4, 83.3, 25.9, 25.0, 24.8, 21.4. <sup>11</sup>B NMR (96 MHz, CDCl<sub>3</sub>) δ 32.1. HRMS (ESI-TOF): calcd for [M+Na]<sup>+</sup> C<sub>22</sub>H<sub>34</sub><sup>10</sup>B<sup>11</sup>BO<sub>4</sub> 406.2579, found: 406.2578.

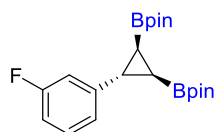

**2,2'-(3-(3-Fluorophenyl)cyclopropane-1,2-diyl)bis(4,4,5,5-tetramethyl-1,3,2-dioxaborolane) (4h)**

The title compound was prepared from 1-fluoro-3-vinylbenzene (24.4 mg, 0.2 mmol), according to general procedure B. The crude residue was purified by flash chromatography (pentane/EA = 20:1, Rf = 0.20) to give the product as a white solid (31.1 mg, 40%). mp: 106-108 °C.

**<sup>1</sup>H NMR (300 MHz, CDCl<sub>3</sub>)** δ 7.13 – 7.07 (m, 1H), 6.82 – 6.79 (m, 1H), 6.76 – 6.68 (m, 2H), 2.18 (t, *J* = 6.3 Hz, 1H), 1.19 (s, 24H), 0.49 (d, *J* = 6.4 Hz, 2H). **<sup>13</sup>C NMR (75 MHz, CDCl<sub>3</sub>)** δ 163.1 (d, *J* = 244.7 Hz), 129.5 (d, *J* = 8.5 Hz), 121.2 (d, *J* = 2.5 Hz), 112.3 (d, *J* = 23.3 Hz), 83.4, 25.6 (d, *J* = 2.0 Hz), 25.0, 24.7. **<sup>11</sup>B NMR (96 MHz, CDCl<sub>3</sub>)** δ 31.9. **<sup>19</sup>F NMR (282 MHz, CDCl<sub>3</sub>)** δ -114.21. **HRMS (ESI-TOF):** calcd for [M+Na]<sup>+</sup> C<sub>21</sub>H<sub>31</sub><sup>10</sup>B<sub>2</sub>O<sub>4</sub>F 409.2362, found: 409.2361.

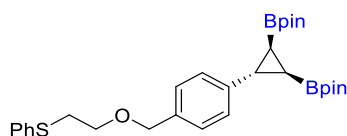

**2,2'-(3-(4-((2-(Phenylthio)ethoxy)methyl)phenyl)cyclopropane-1,2-diyl)bis(4,4,5,5-tetramethyl-1,3,2-dioxaborolane) (4i)**

The title compound was prepared from phenyl(2-((4-vinylbenzyl)oxy)ethyl)sulfane (54 mg, 0.2 mmol), according to general procedure B. The crude residue was purified by flash chromatography (pentane/EA = 20:1, Rf = 0.20) to give the product as a colorless oil (60 mg, 56%).

**<sup>1</sup>H NMR (300 MHz, CDCl<sub>3</sub>)** δ 7.34 – 7.31 (m, 2H), 7.26 – 7.22 (m, 1H), 7.21 – 7.15 (m, 4H), 7.06 (d, *J* = 8.2 Hz, 2H), 4.46 (s, 2H), 3.61 (t, *J* = 6.9 Hz, 2H), 3.11 (t, *J* = 6.9 Hz, 2H), 2.27 (t, *J* = 6.4 Hz, 1H), 1.26 (s, 24H), 0.56 (d, *J* = 6.4 Hz, 2H). **<sup>13</sup>C NMR (75 MHz, CDCl<sub>3</sub>)** δ 143.3, 136.0, 135.1, 129.3, 128.9, 127.8, 126.1, 125.5, 83.3, 72.8, 68.3, 33.3, 25.7, 25.0, 24.7. **<sup>11</sup>B NMR (96 MHz, CDCl<sub>3</sub>)** δ 32.6. **HRMS (ESI-TOF):** calcd for [M+Na]<sup>+</sup> C<sub>30</sub>H<sub>42</sub><sup>10</sup>B<sub>2</sub>O<sub>5</sub>S 557.2908, found: 557.2911.

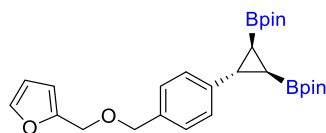

**2,2'-(3-(4-((Furan-2-ylmethoxy)methyl)phenyl)cyclopropane-1,2-diyl)bis(4,4,5,5-tetramethyl-1,3,2-dioxaborolane) (4j)**

The title compound was prepared from 2-(((4-vinylbenzyl)oxy)methyl)furan (42.8 mg, 0.2 mmol), according to general procedure B. The crude residue was purified by flash chromatography (pentane/EA = 20:1, Rf = 0.20) to give the product as a colorless oil (44.7 mg, 48%).

**<sup>1</sup>H NMR (300 MHz, CDCl<sub>3</sub>)** δ 7.41 (dd, *J* = 1.8, 0.9 Hz, 1H), 7.23 – 7.20 (m, 2H), 7.08 (d, *J* = 8.2 Hz, 2H), 6.34 (dd, *J* = 3.2, 1.8 Hz, 1H), 6.30 (dd, *J* = 3.2, 0.8 Hz, 1H), 4.49 (s, 2H), 4.41 (s, 2H), 2.27 (t, *J* = 6.4 Hz, 1H), 1.26 (s, 24H), 0.57 (d, *J* = 6.4 Hz, 2H). **<sup>13</sup>C NMR (75 MHz, CDCl<sub>3</sub>)** δ 151.9, 143.4, 142.8, 135.0, 128.0, 125.6, 110.2, 109.3, 83.3, 71.6, 63.3, 25.7, 25.0, 24.8. **<sup>11</sup>B NMR (96 MHz, CDCl<sub>3</sub>)** δ 32.9. **HRMS (ESI-TOF):** calcd for [M+Na]<sup>+</sup> C<sub>27</sub>H<sub>38</sub><sup>10</sup>B<sub>2</sub>O<sub>6</sub> 501.2824, found: 501.2838.

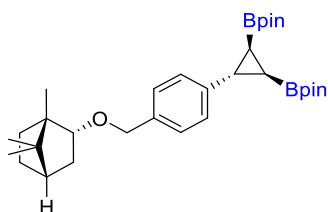

**2,2'-(3-(4-(((1*S*,2*R*,4*S*)-1,7,7-Trimethylbicyclo[2.2.1]heptan-2-yl)oxy)methyl)phenyl)cyclopropane-1,2-diyl)bis(4,4,5,5-tetramethyl-1,3,2-dioxaborolane) (4k)**

The title compound was prepared from (1*S*,2*R*,4*S*)-1,7,7-trimethyl-2-((4 vinylbenzyl)oxy)bicyclo[2.2.1]heptane (54 mg, 0.2 mmol), according to general procedure B. The crude residue was purified by flash chromatography (pentane/EA = 30:1,  $R_f$  = 0.20) to give the product as a colorless oil (43.9 mg, 41%).

$^1\text{H NMR}$  (300 MHz,  $\text{CDCl}_3$ )  $\delta$  7.19 (d,  $J$  = 8.1 Hz, 2H), 7.06 (d,  $J$  = 8.2 Hz, 2H), 4.44 (d,  $J$  = 28.0 Hz, 2H), 3.67 – 3.63 (m, 1H), 2.27 (t,  $J$  = 6.4 Hz, 1H), 2.11 – 2.05 (m, 2H), 1.66 – 1.61 (m, 2H), 1.25 (s, 24H), 1.09 (d,  $J$  = 1.9 Hz, 2H), 1.04 (d,  $J$  = 3.3 Hz, 1H), 0.87 (s, 3H), 0.84 (s, 3H), 0.81 (s, 3H), 0.57 (d,  $J$  = 6.4 Hz, 2H).  $^{13}\text{C NMR}$  (75 MHz,  $\text{CDCl}_3$ )  $\delta$  142.7, 136.8, 127.3, 125.4, 83.9, 83.3, 71.3, 49.3, 47.8, 45.1, 36.1, 28.3, 26.8, 25.8, 25.0, 24.8, 19.8, 18.9, 14.0.  $^{11}\text{B NMR}$  (96 MHz,  $\text{CDCl}_3$ )  $\delta$  32.7. **HRMS (ESI-TOF):** calcd for  $[\text{M}+\text{Na}]^+$   $\text{C}_{32}\text{H}_{50}^{10}\text{B}^{11}\text{BO}_5$  558.3781, found: 558.3783.

## 5 Derivatization of 3a

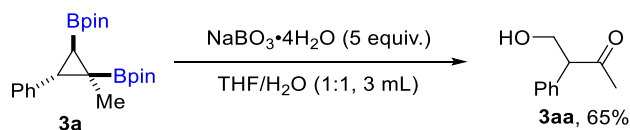

### 4-Hydroxy-3-phenylbutan-2-one (3aa)

The title compound was synthesized according to the following procedure<sup>[5]</sup>: To the boration product **3a** (38.4 mg, 0.1 mmol) in THF (1.5 mL) and water (1.5 mL) was added  $\text{NaBO}_3 \cdot 4\text{H}_2\text{O}$  (76.5 mg, 5 equiv.). The reaction mixture was stirred vigorously for 0.5 h at room temperature. The reaction mixture was quenched with water and then extracted with EtOAc (5 mL). The combined organic layers were washed with brine (15 mL), dried over  $\text{Na}_2\text{SO}_4$  and concentrated. The crude product was purified by column chromatography on silica gel to afford the corresponding product **3aa** as colorless oil (10.7 mg, 65%)

$^1\text{H NMR}$  (300 MHz,  $\text{CDCl}_3$ )  $\delta$  7.40 – 7.27 (m, 3H), 7.25 – 7.14 (m, 2H), 4.15 (dd,  $J = 11.3, 8.6$  Hz, 1H), 3.89 (dd,  $J = 8.6, 4.7$  Hz, 1H), 3.71 (dd,  $J = 11.3, 4.7$  Hz, 1H), 2.09 (d,  $J = 0.24$  Hz, 3H).  $^{13}\text{C NMR}$  (75 MHz,  $\text{CDCl}_3$ )  $\delta$  209.3, 135.5, 129.2, 128.6, 127.9, 64.1, 61.6, 29.5.

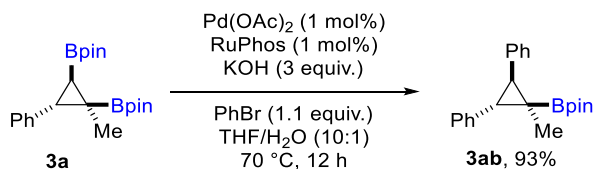

### 4,4,5,5-Tetramethyl-2-(1-methyl-2,3-diphenylcyclopropyl)-1,3,2-dioxaborolane (3ab)

The title compound was synthesized according to the following procedure<sup>[6]</sup>: A 4 mL screw-cap vial with a magnetic stir bar was charged with  $\text{Pd}(\text{OAc})_2$  (0.23 mg, 1 mol%), RuPhos (0.47 mg, 1 mol%), KOH (16.8 mg, 3 equiv.), and **3a** (38.4 mg, 0.1 mmol). The vial was closed with a Teflon septum and cap and connected to the atmosphere via a needle. THF (1 mL) was added, followed by  $\text{H}_2\text{O}$  (100  $\mu\text{L}$ ), and bromobenzene (15.6 mg, 1 equiv.). The vial was quickly exchanged for a Teflon-lined screw cap and the reaction was stirred at  $70^\circ\text{C}$  for 12 h. At this time, the reaction was allowed to cool to room temperature and the reaction was then quenched upon addition of water (5 mL) and the mixture was extracted with EtOAc (3 mL). The combined organic was dried using  $\text{Na}_2\text{SO}_4$  and then concentrated in vacuo. The crude product was purified by column chromatography on silica gel to afford the corresponding product **3ab** as colorless oil (31.1 mg, 93%).

$^1\text{H NMR}$  (300 MHz,  $\text{CDCl}_3$ )  $\delta$  7.29 – 7.22 (m, 5H), 7.19 – 7.07 (m, 5H), 3.03 (d,  $J = 6.5$  Hz, 1H), 2.41 (d,  $J = 6.5$  Hz, 1H), 0.96 (s, 6H), 0.90 (s, 3H), 0.80 (s, 6H).  $^{13}\text{C NMR}$  (75 MHz,  $\text{CDCl}_3$ )  $\delta$  140.4, 138.9, 129.6, 129.0, 127.9, 127.8, 126.0, 125.9, 83.1, 35.9, 32.0, 24.8, 24.4, 16.8.  $^{11}\text{B NMR}$  (96 MHz,  $\text{CDCl}_3$ )  $\delta$  33.3. HRMS (EI) calculated for  $[\text{M}] \text{C}_{22}\text{H}_{27}\text{O}_2^{10}\text{B}_1$  333.2135, found: 333.2134.



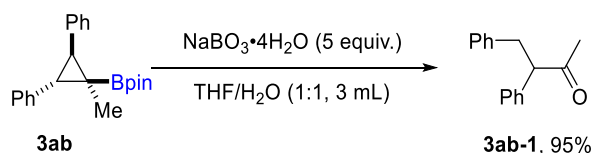

### 3,4-Diphenylbutan-2-one (**3ab-1**)<sup>[9]</sup>

The title compound was synthesized according to the following procedure<sup>[5]</sup>: To the boration product **3ab** (33.4 mg, 0.1 mmol) in THF (1.5 mL) and water (1.5 mL) was added NaBO<sub>3</sub>•4H<sub>2</sub>O (76.5 mg, 5 equiv.). The reaction mixture was stirred vigorously for 0.5 h at room temperature. The reaction mixture was quenched with water and then extracted with EtOAc (5 mL). The combined organic layers were washed with brine (15 mL), dried over Na<sub>2</sub>SO<sub>4</sub> and concentrated. The crude product was purified by column chromatography on silica gel to afford the corresponding product **3ab-1** as colorless oil (21.3 mg, 95%)

<sup>1</sup>H NMR (300 MHz, CDCl<sub>3</sub>) δ 7.26 – 7.17 (m, 3H), 7.16 – 7.04 (m, 5H), 7.00 – 6.85 (m, 2H), 3.84 (t, *J* = 7.4 Hz, 1H), 3.35 (dd, *J* = 13.8, 7.5 Hz, 1H), 2.83 (dd, *J* = 13.8, 7.2 Hz, 1H), 1.95 (d, *J* = 0.3 Hz, 3H). <sup>13</sup>C NMR (75 MHz, CDCl<sub>3</sub>) δ 207.7, 139.7, 138.5, 129.0, 128.9, 128.4, 128.3, 127.4, 126.1, 61.6, 38.4, 29.6.

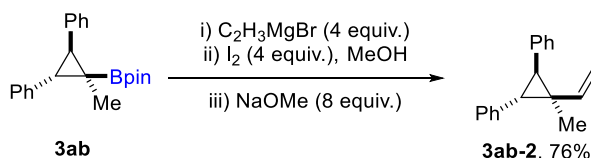

### (3-Methyl-3-vinylcyclopropane-1,2-diyl)dibenzene (**3ab-2**)

The title compound was synthesized according to the following procedure<sup>[7]</sup>: to an oven-dried round bottom flask containing a stirring bar was added a solution of **3ab** (33.4 mg, 0.1 mmol) in THF (2 mL) and subsequently vinylmagnesium bromide (1 M, 0.4 mL, 4.0 equiv.) was added dropwise. The mixture was stirred at room temperature for 30 min. To the above solution at -78 °C, I<sub>2</sub> (102 mg, 2.0 equiv.) in methanol (3.0 mL) was added dropwise. The reaction mixture was allowed to stir 30 min at the same temperature followed by dropwise addition of a solution of NaOMe (44 mg, 8.0 equiv.) in methanol (3 mL). After warming to room temperature, the mixture was stirred for another 1.5 h, diluted with EtOAc (10 mL) and washed sequentially with 10% aqueous solution of Na<sub>2</sub>S<sub>2</sub>O<sub>3</sub> (5 mL). Then, the mixture was extracted with EtOAc (10 mL), dried over Na<sub>2</sub>SO<sub>4</sub>, filtered and concentrated under reduced pressure. The crude product was purified by column chromatography on silica gel to afford the corresponding product **3ab-2** as colorless oil (17.8 mg, 76%).

<sup>1</sup>H NMR (300 MHz, CDCl<sub>3</sub>) δ 7.32 – 7.19 (m, 8H), 7.19 – 7.07 (m, 2H), 5.29 (dd, *J* = 17.2, 10.6 Hz, 1H), 4.99 (dd, *J* = 17.2, 1.5 Hz, 1H), 4.85 (dd, *J* = 10.6, 1.5 Hz, 1H), 2.70 (d, *J* = 6.9 Hz, 1H), 2.62 (d, *J* = 6.9 Hz, 1H), 1.01 (s, 3H). <sup>13</sup>C NMR (75 MHz, CDCl<sub>3</sub>) δ 142.8, 138.8, 138.3, 129.2, 129.2, 128.2, 126.3, 126.3, 111.6, 36.0, 35.5, 32.1, 17.6. HRMS (EI) calculated for [M] C<sub>18</sub>H<sub>18</sub> 234.1403, found: 234.1398.

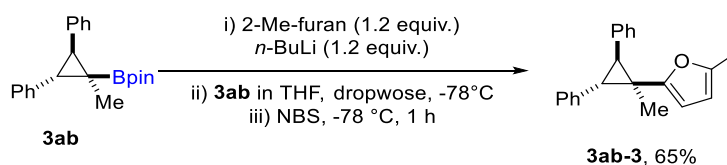

### 2-Methyl-5-(1-methyl-2,3-diphenylcyclopropyl)furan (**3ab-3**)

The title compound was synthesized according to the following procedure<sup>[8]</sup>: A solution of 2-Mefuran (9.8 mg, 1.2 eq.) in THF (0.3 M) was cooled to -78 °C and treated with *n*-BuLi (1.2 eq., 2.5 M in hexanes). The cooling

bath was removed, and the mixture was stirred at room temperature for 1 h. The mixture was cooled to  $-78\text{ }^{\circ}\text{C}$  and the **3ab** (33.4 mg, 0.1 mmol.) was added dropwise as a solution in THF (0.5 M). The mixture was stirred at  $-78\text{ }^{\circ}\text{C}$  for 1 h. A solution of *N*-bromosuccinimide (NBS, 21.1 mg, 1.2 eq.) in MeOH (0.2 M) was added dropwise. After 1 h at  $-78\text{ }^{\circ}\text{C}$ , a saturated aqueous solution of  $\text{Na}_2\text{S}_2\text{O}_3$  was added and the reaction mixture was allowed to warm to room temperature. The reaction mixture was diluted with  $\text{Et}_2\text{O}$  and water. The layers were separated, and the aqueous layer was extracted with  $\text{Et}_2\text{O}$ . The combined organic layers were dried over  $\text{Na}_2\text{SO}_4$ , filtered and concentrated under vacuum. Purification by column chromatography on silica gel, gave the desired product **3ab-3** (18.7 mg, 65%).

$^1\text{H}$  NMR (300 MHz,  $\text{CDCl}_3$ )  $\delta$  7.40 – 7.32 (m, 4H), 7.29 – 7.26 (m, 1H), 7.23 – 7.11 (m, 5H), 5.85 – 5.77 (m, 1H), 5.72 (dq,  $J = 3.0, 1.0$  Hz, 1H), 3.24 (d,  $J = 6.9$  Hz, 1H), 2.68 (d,  $J = 6.9$  Hz, 1H), 2.09 (d,  $J = 0.8$  Hz, 3H), 1.28 (s, 3H).  $^{13}\text{C}$  NMR (75 MHz,  $\text{CDCl}_3$ )  $\delta$  154.9, 150.2, 138.6, 138.0, 129.3, 128.6, 128.2, 127.6, 126.4, 125.9, 106.3, 105.6, 36.1, 33.6, 29.5, 19.8, 13.4. HRMS (EI) calculated for [M]  $\text{C}_{21}\text{H}_{20}\text{O}$  288.1509, found: 288.1502.

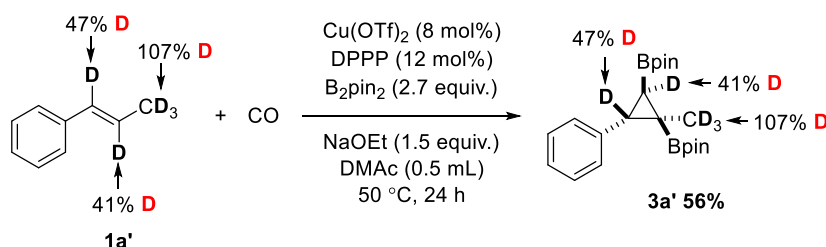

The title compound **3a'** was prepared from **1a'** (0.2 mmol), according to general procedure A. The crude residue was purified by flash chromatography (pentane/EA = 50:1,  $R_f = 0.20$ ) to give the product **3a'** as a white solid (43.1 mg, 56%).

$^1\text{H}$  NMR (300 MHz,  $\text{CDCl}_3$ )  $\delta$  7.26 – 7.05 (m, 5H), 2.62 – 2.41 (m, 1H), 1.26 (d,  $J = 3.3$  Hz, 24H), 0.82 – 0.77 (m, 2H), 0.41 – 0.37 (m, 1H).

## 6. Reference

- [1] L. Tao, X. Guo, J. Li, R. Li, Z. Lin, W. Zhao, *J. Am. Chem. Soc.* **2020**, *142*, 18118–18127.
- [2] H. Albright, H.L. Vonesh, C.S. Schindler, *Org. Lett.* **2020**, *22*, 3155–3160.
- [3] CN112299945, 2021.
- [4] Y. Zou, J. S. Zhou, *Chem. Commun.* **2014**, *50*, 3725–3728.
- [5] J.-E. Lee, J. Yun, *Angew. Chem. Int. Ed.* **2008**, *47*, 145–147.
- [6] F.-P. Wu, X. Luo, U. Radius, T. B. Marder, X.-F. Wu, *J. Am. Chem. Soc.* **2020**, *142*, 14074–14079.
- [7] S. Z. Sun, R. Martin, *Angew. Chem. Int. Ed.* **2018**, *57*, 3622–3625.
- [8] A. Bonet, M. Odachowski, D. Leonori, S. Essafi, V. K. Aggarwal, *Nature Chem.* **2014**, *6*, 584–589.
- [9] D. Mendez-Sanchez, J. Mangas-Sanchez, E. Busto, V. Gotor, V. Gotor-Fernandez, *Adv. Synth. Catal.* **2016**, *358*, 122–131.

## 7. Spectra of Products

211112.322.10.fid — Huiqing Geng GHQ-F-248 — Au1H CDCl<sub>3</sub> {C:\Bruker\TopSpin3.6.2} 2111 22 — 300.13MHz

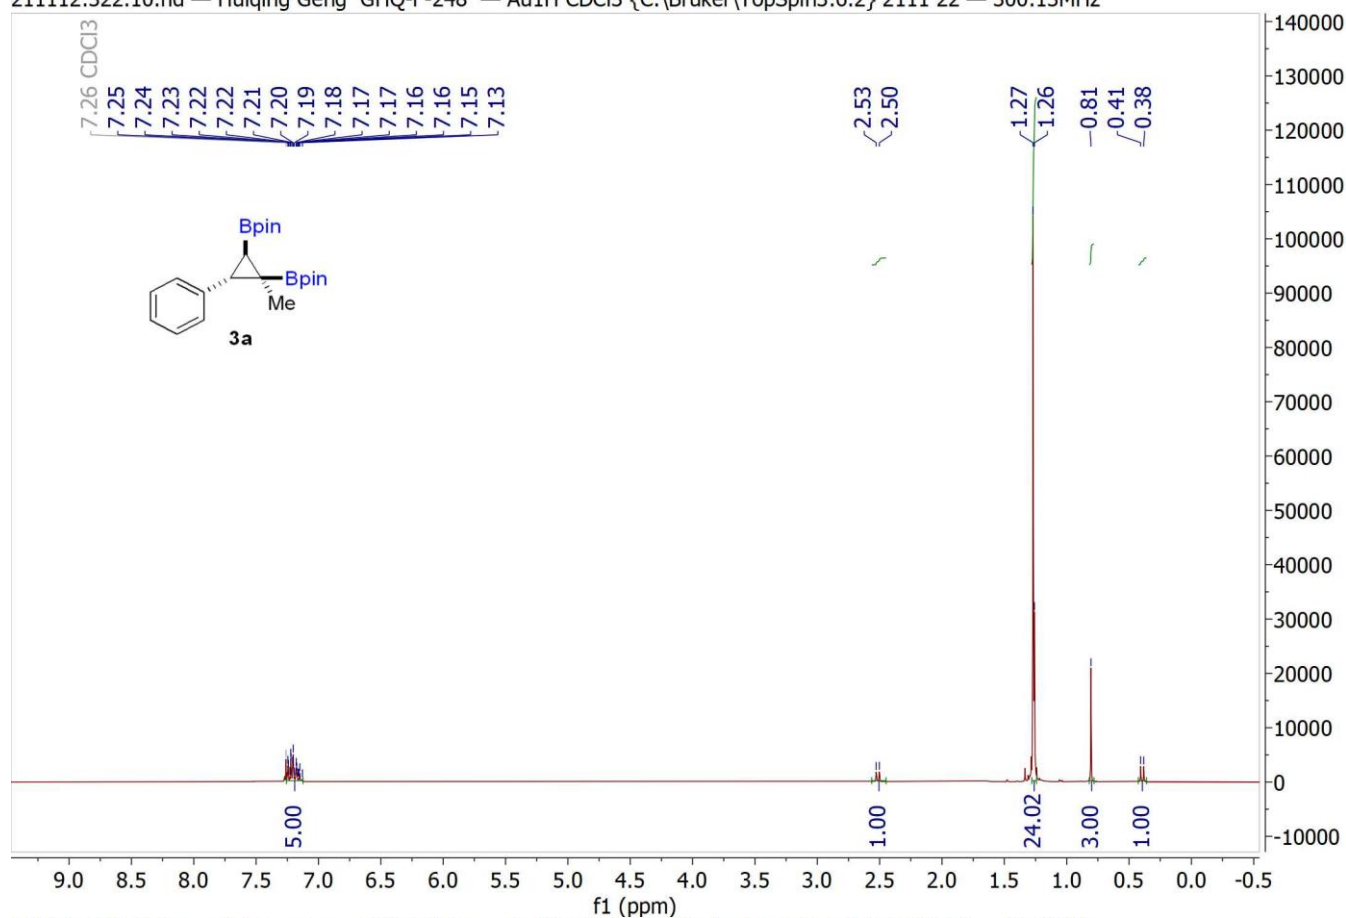

211112.322.11.fid — Huiqing Geng GHQ-F-248 — Au13C CDCl<sub>3</sub> {C:\Bruker\TopSpin3.6.2} 2111 22 — 75.48MHz

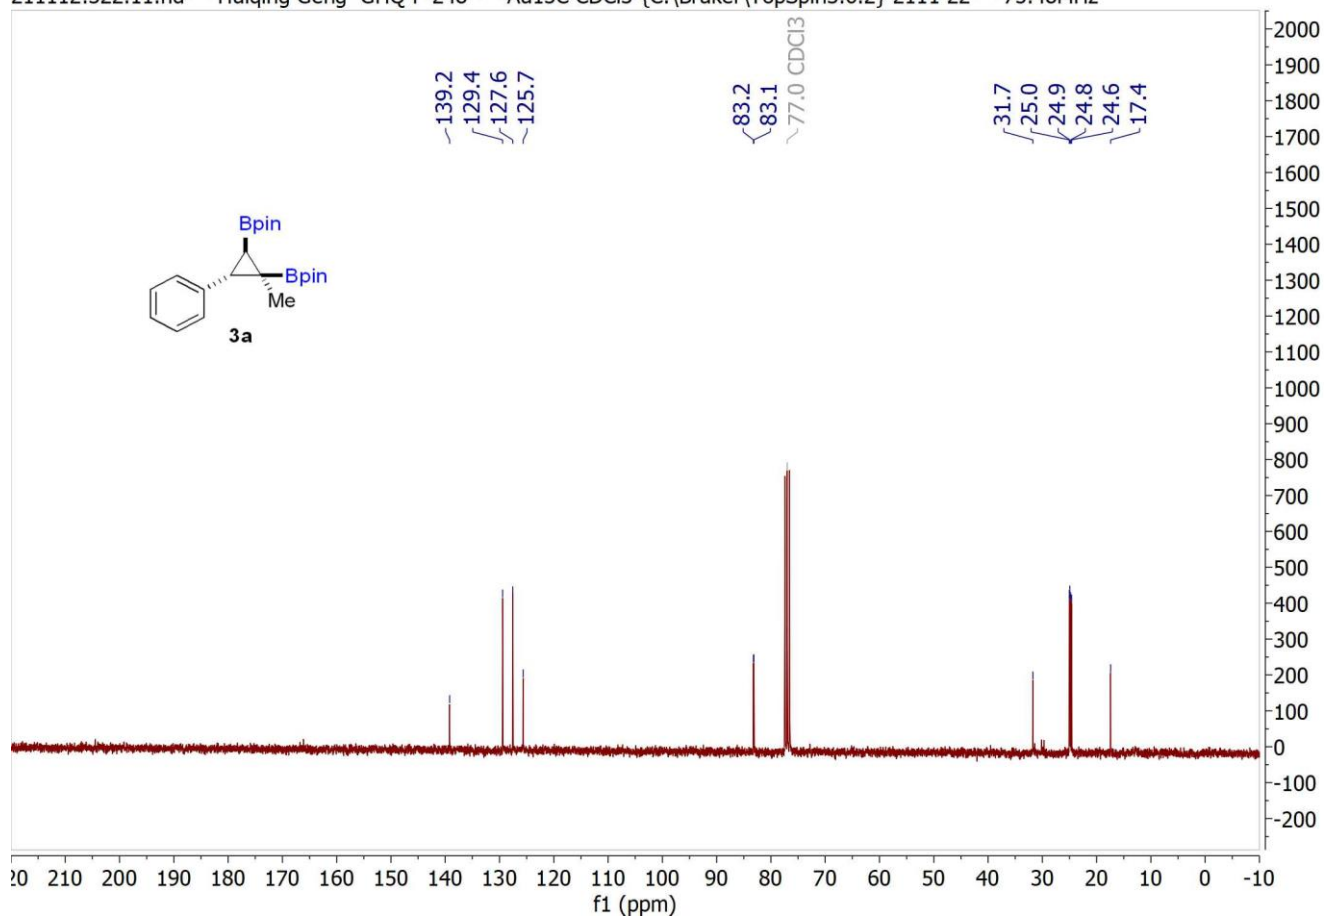

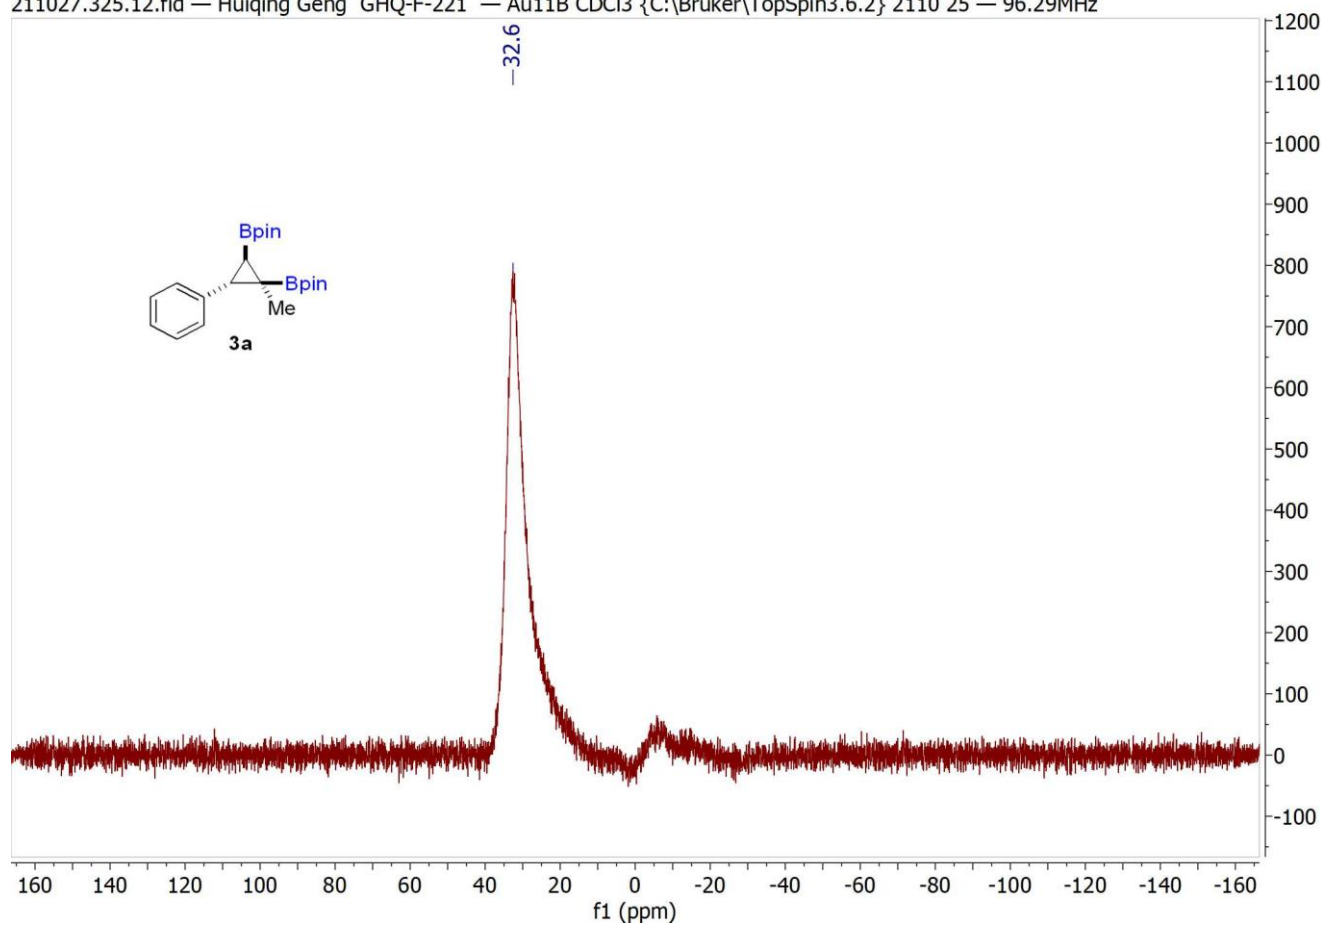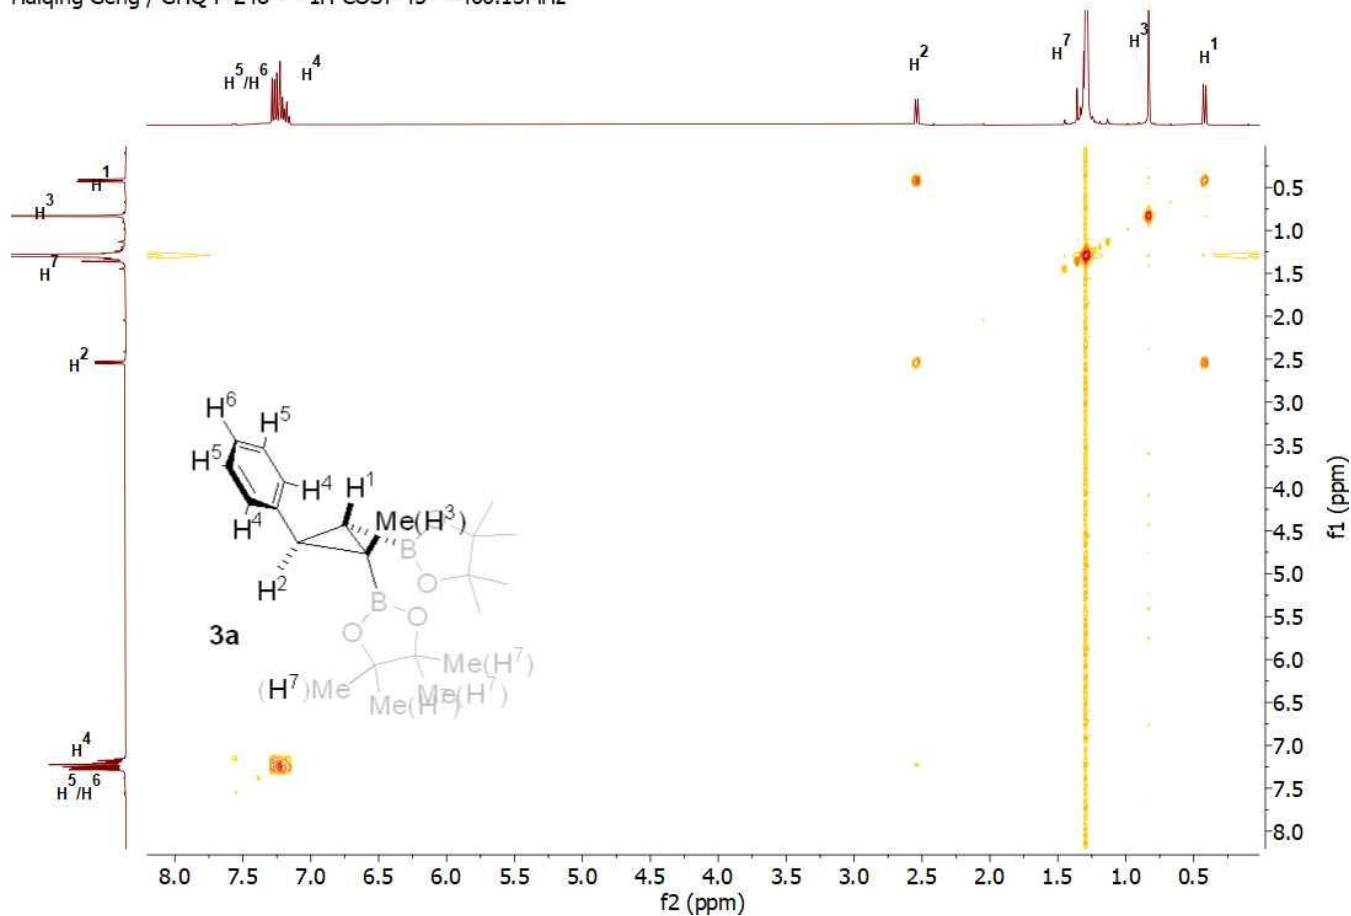

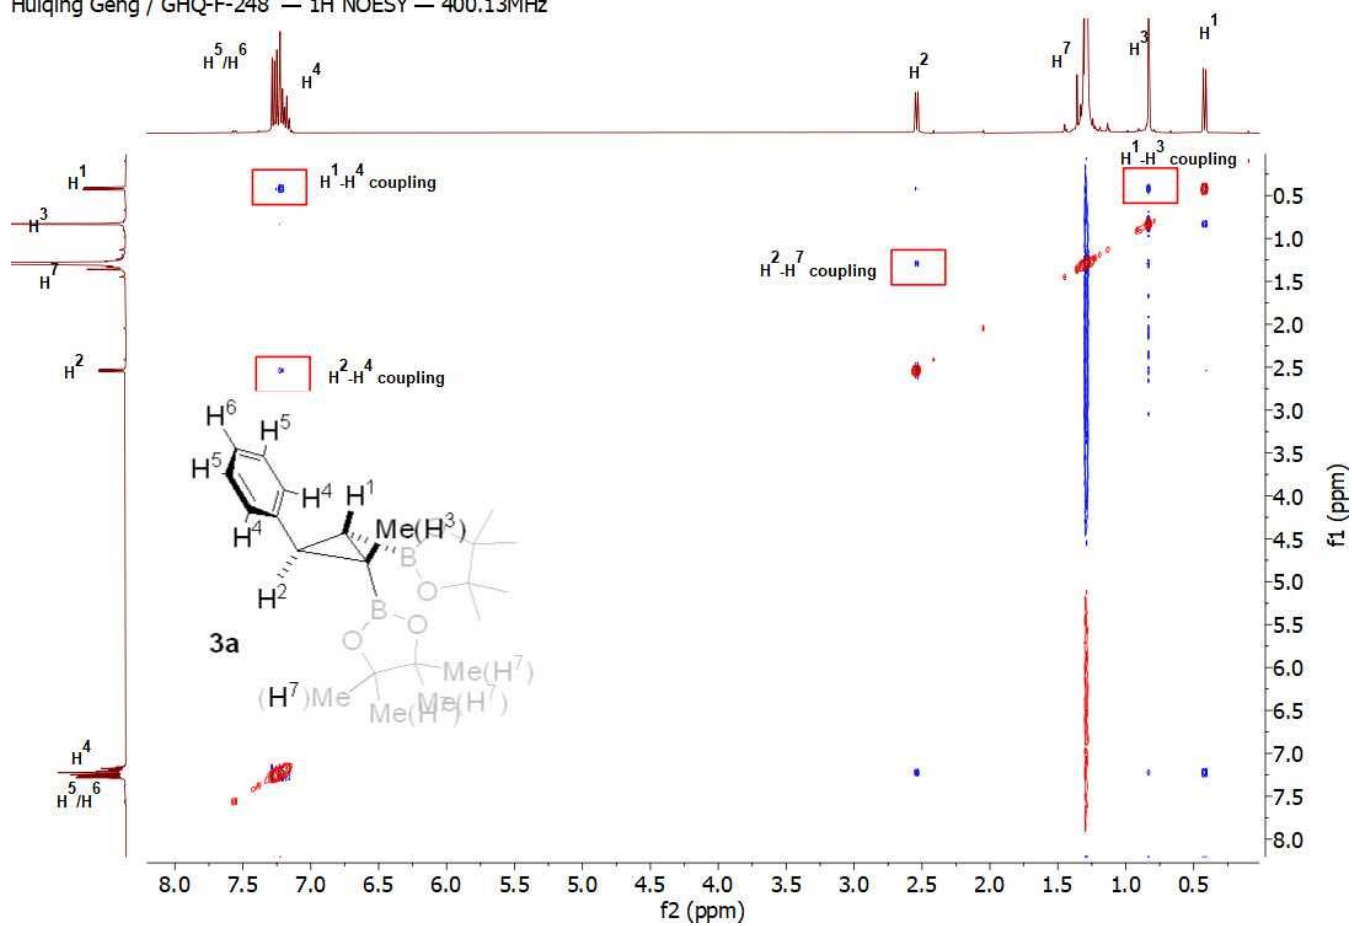

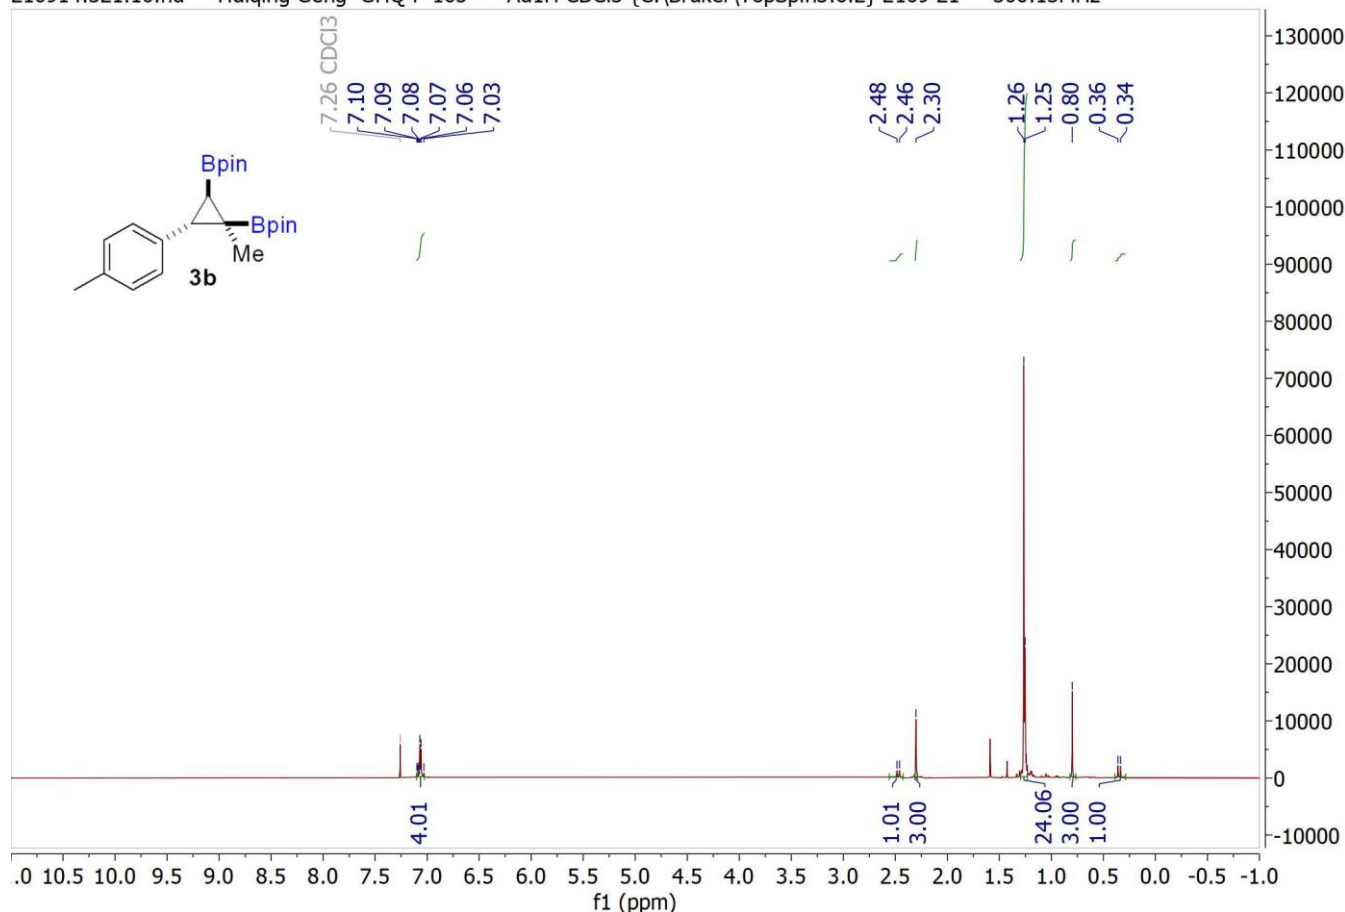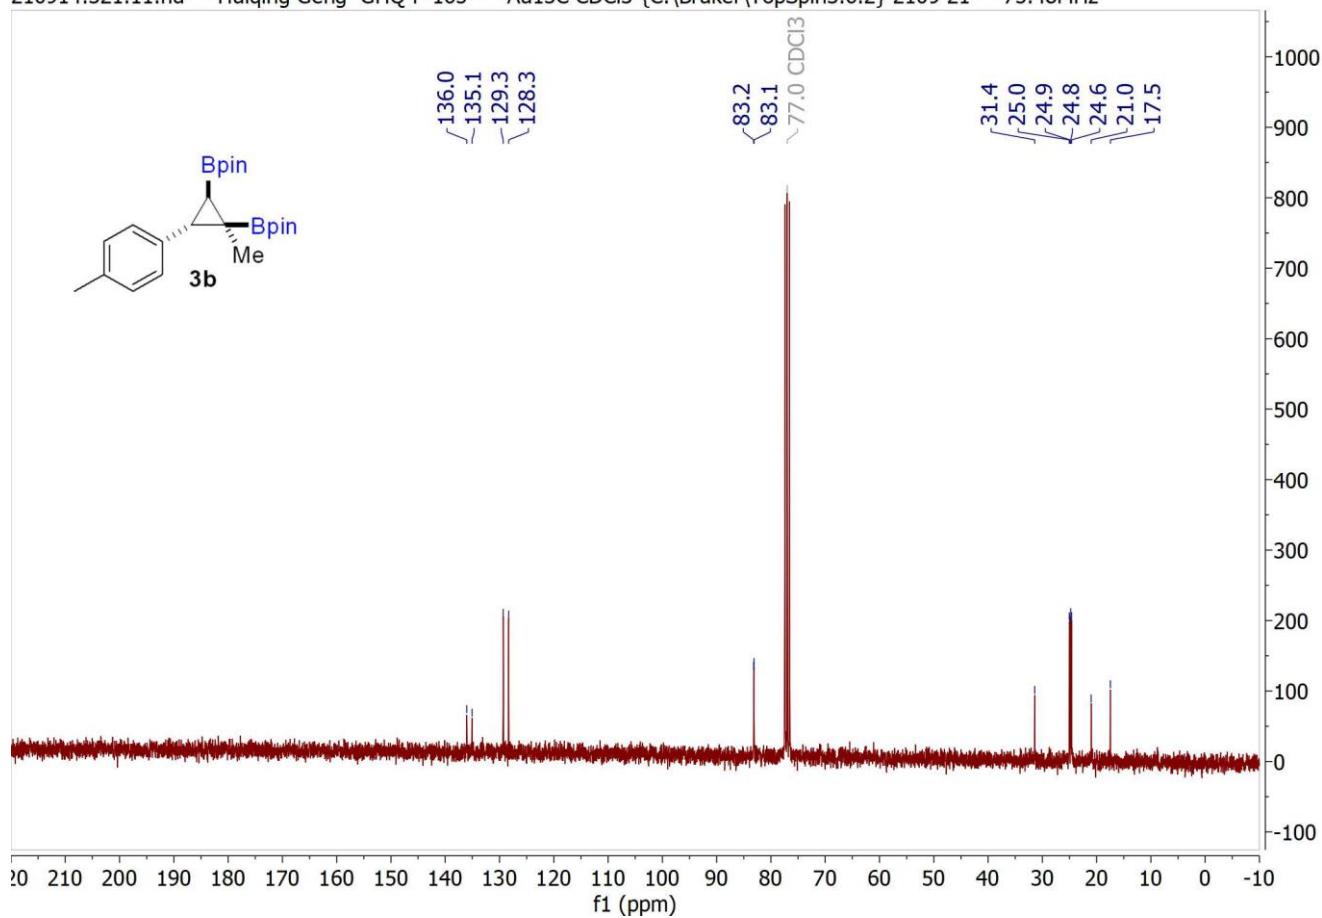

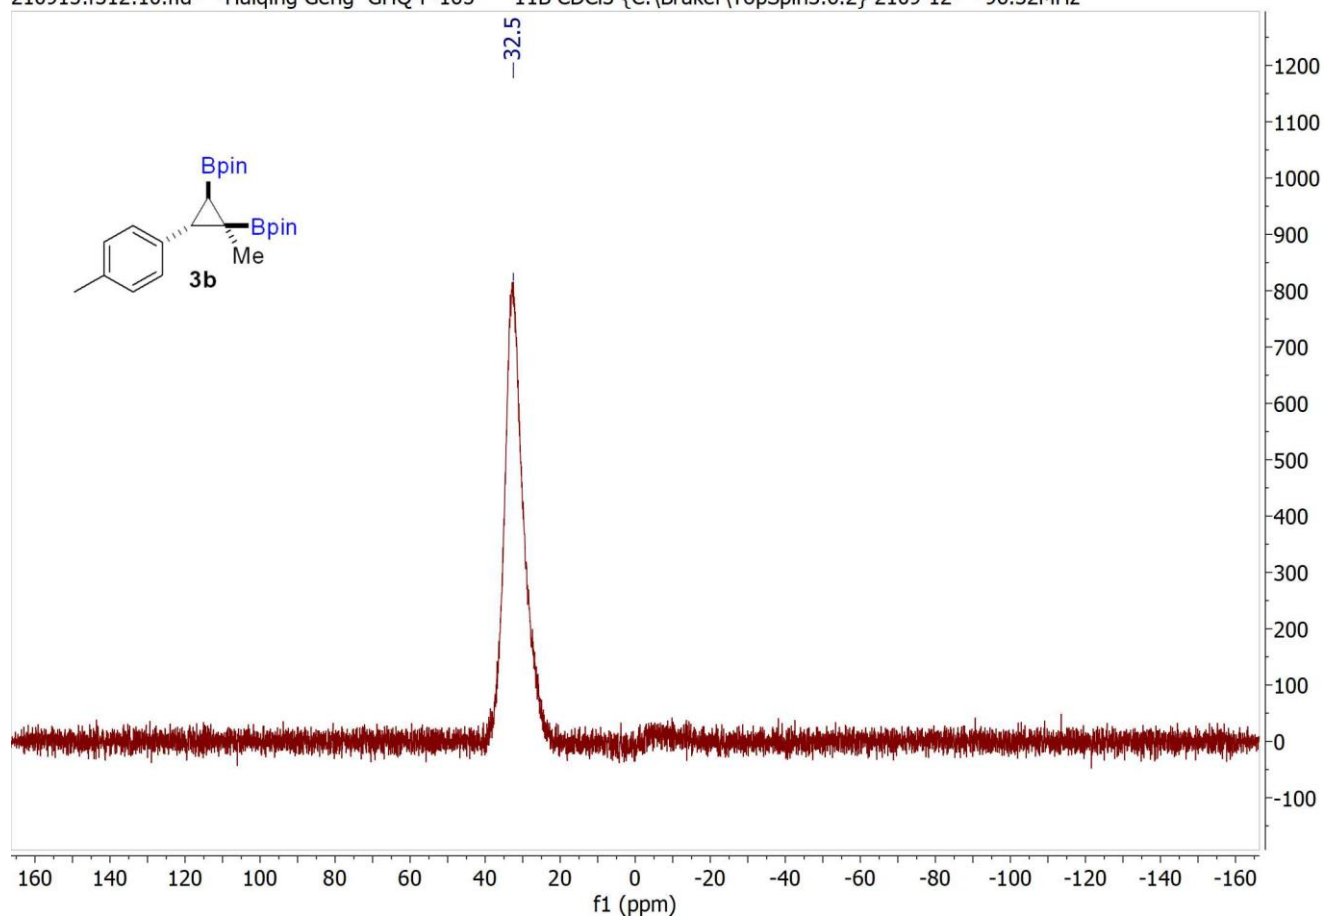

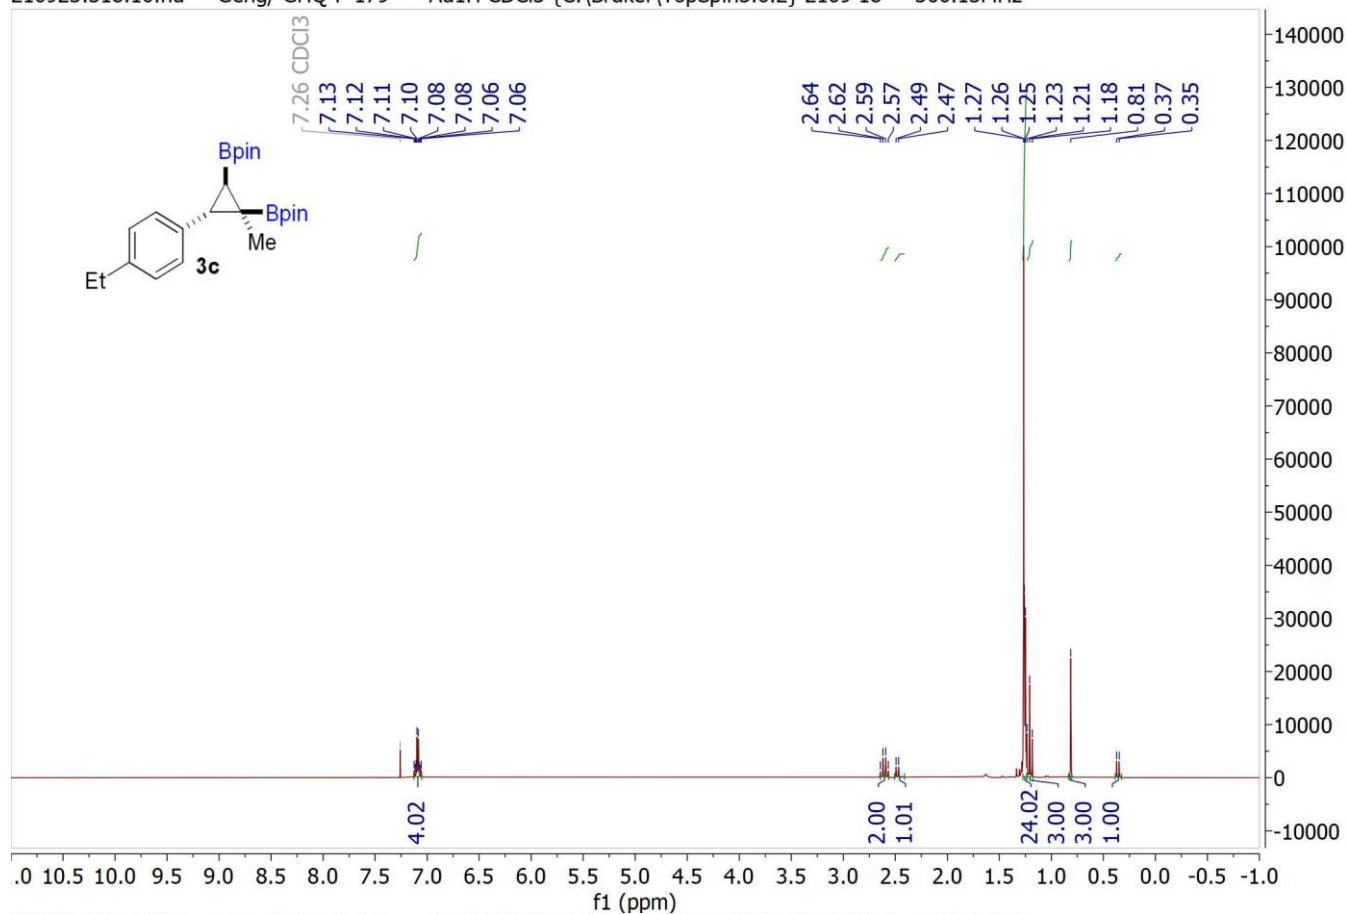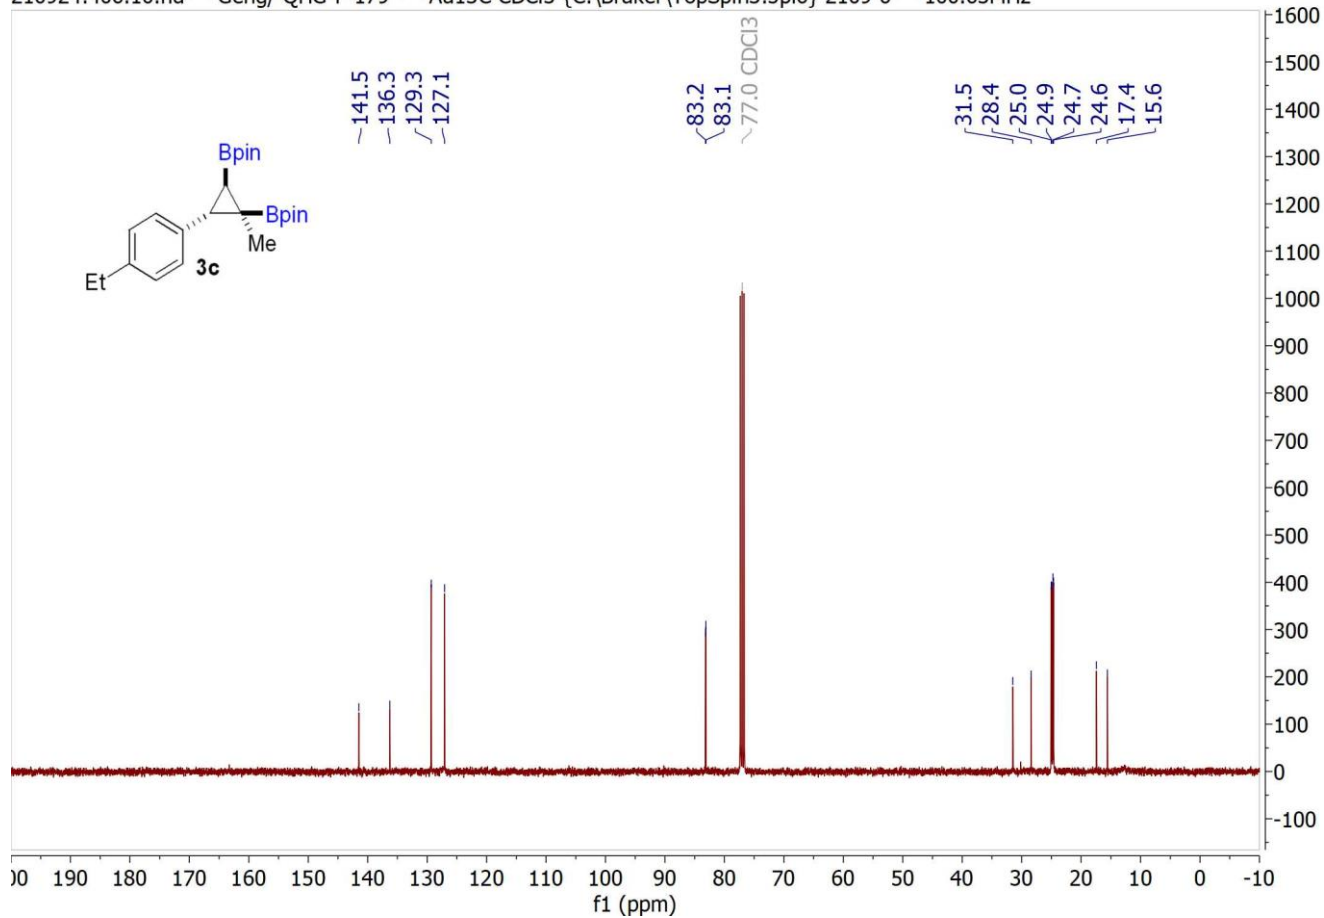



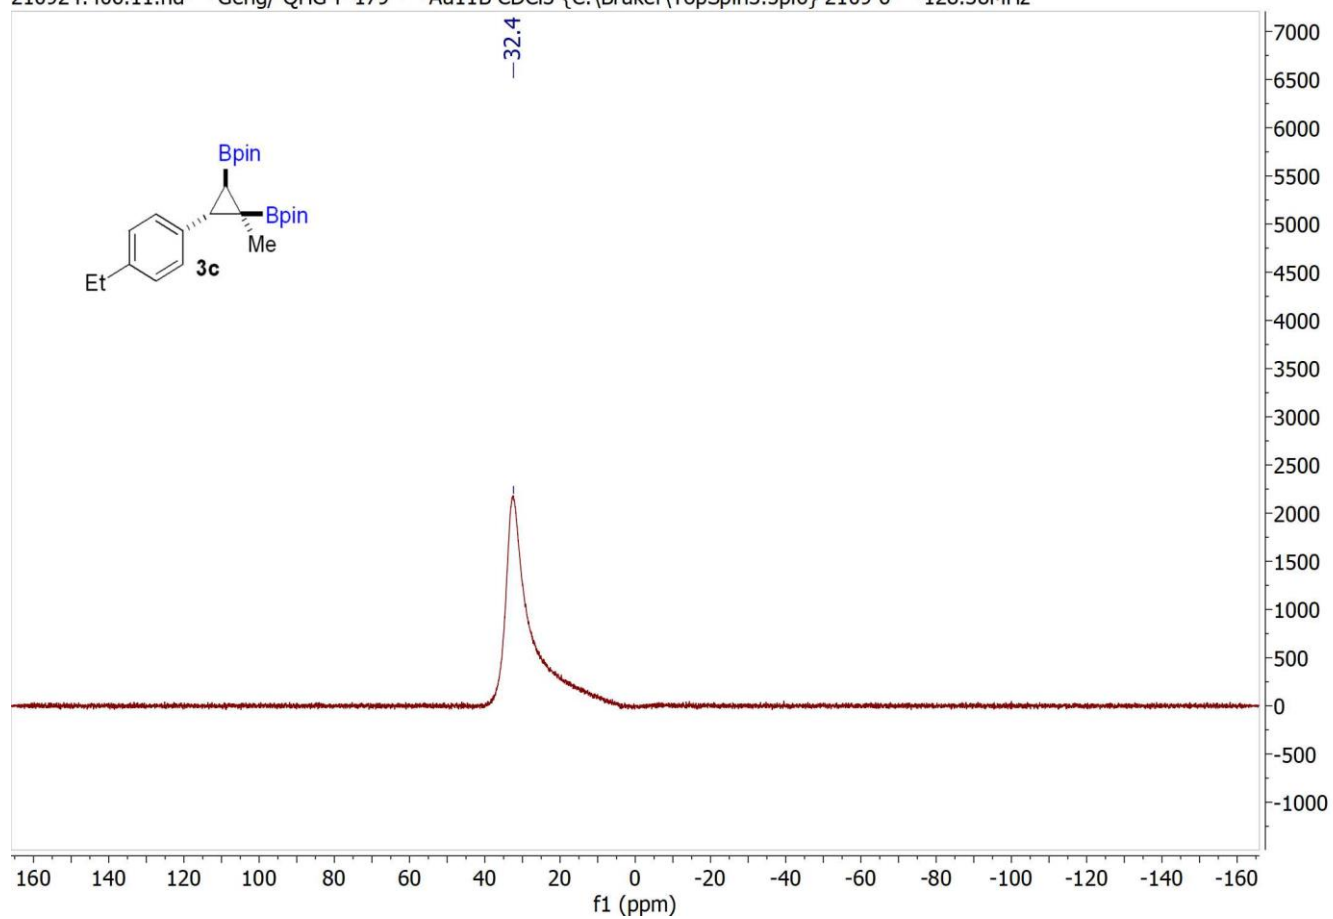

211025.f354.10.fid — Huiqing Geng GHQ-F-217 — PROTON CDCl<sub>3</sub> {C:\Bruker\TopSpin3.6.2} 2110 54 — 300.20MHz

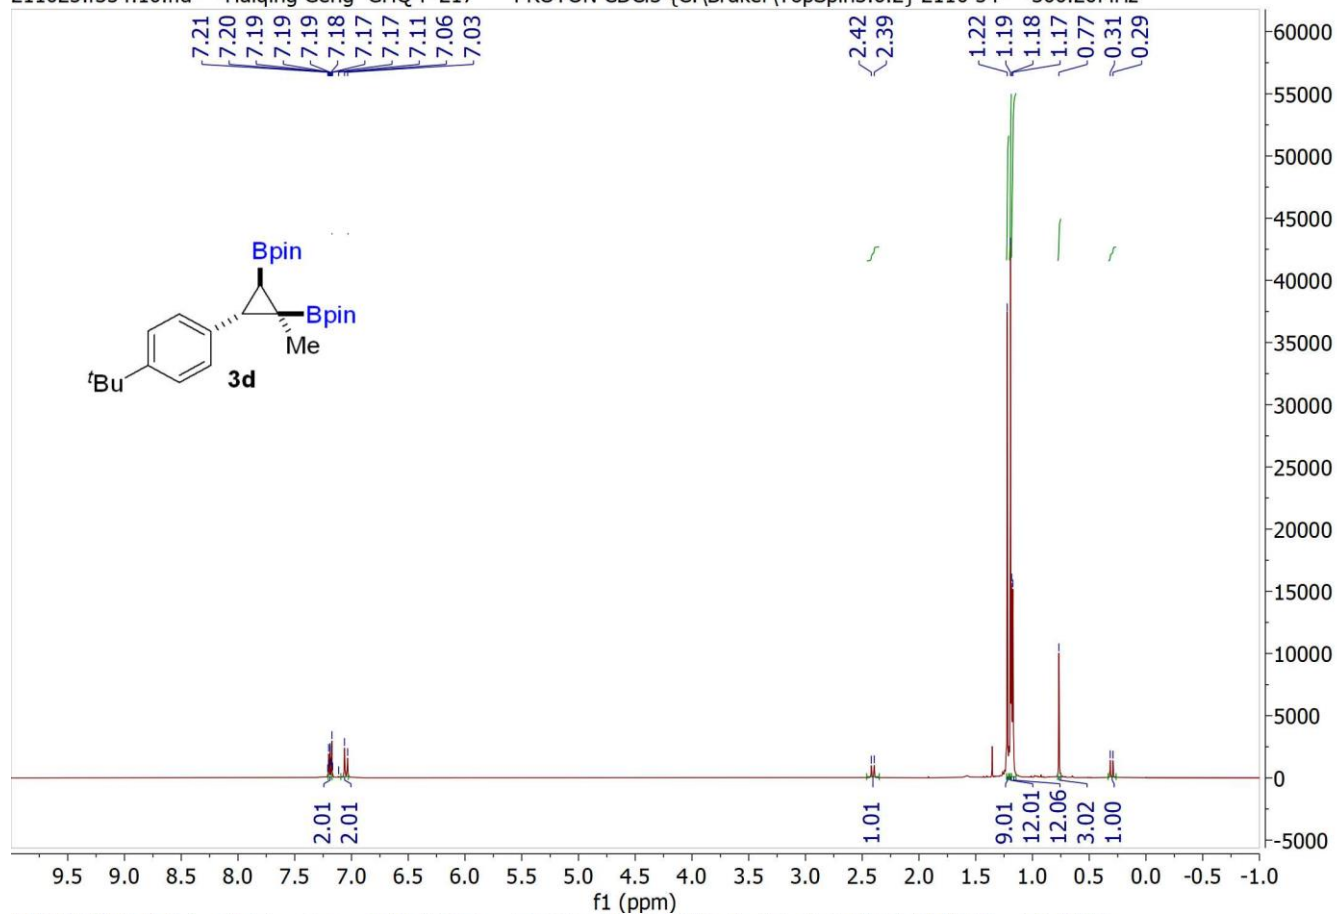

211025.f354.11.fid — Huiqing Geng GHQ-F-217 — C13CPD CDCl<sub>3</sub> {C:\Bruker\TopSpin3.6.2} 2110 54 — 75.49MHz

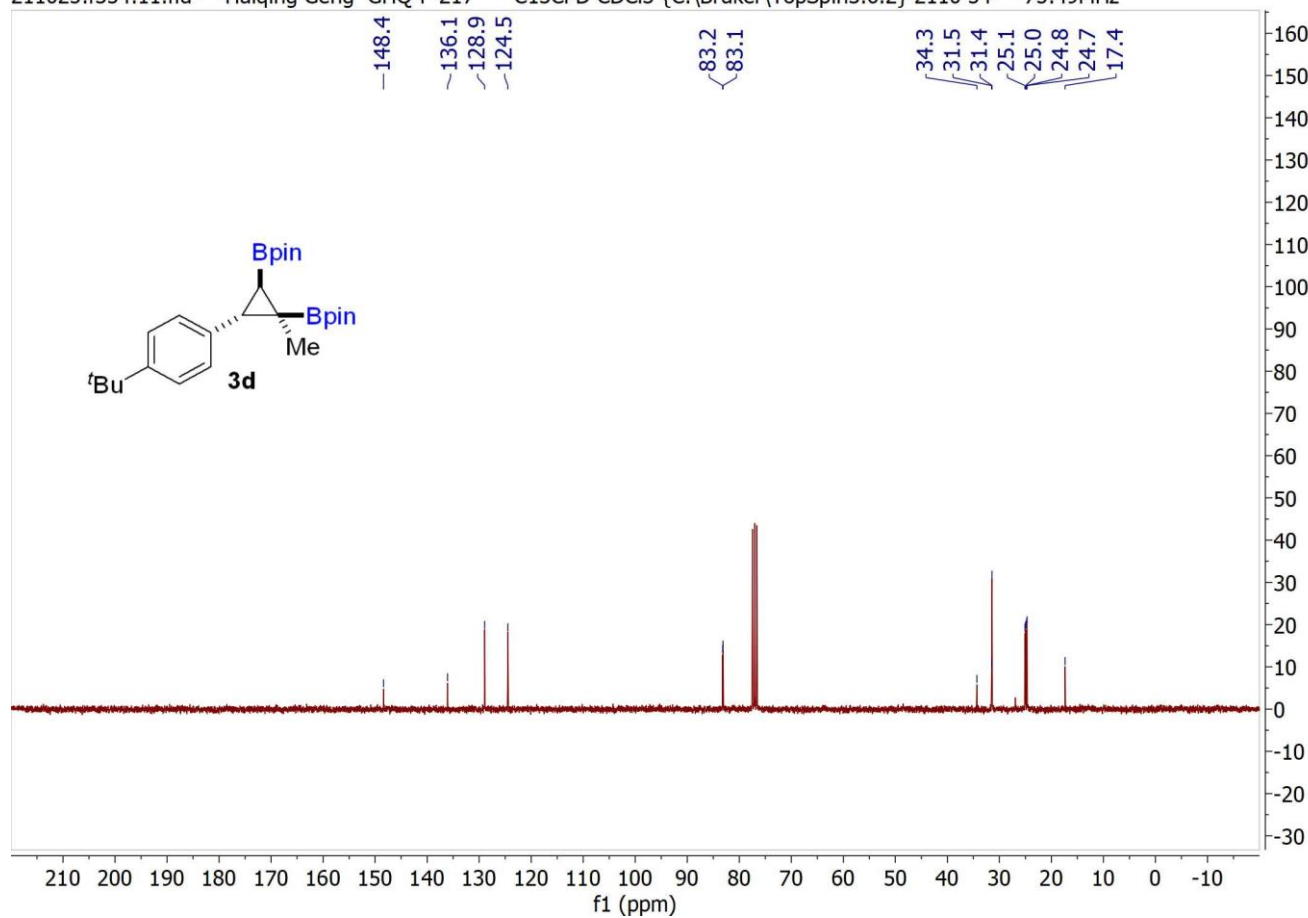

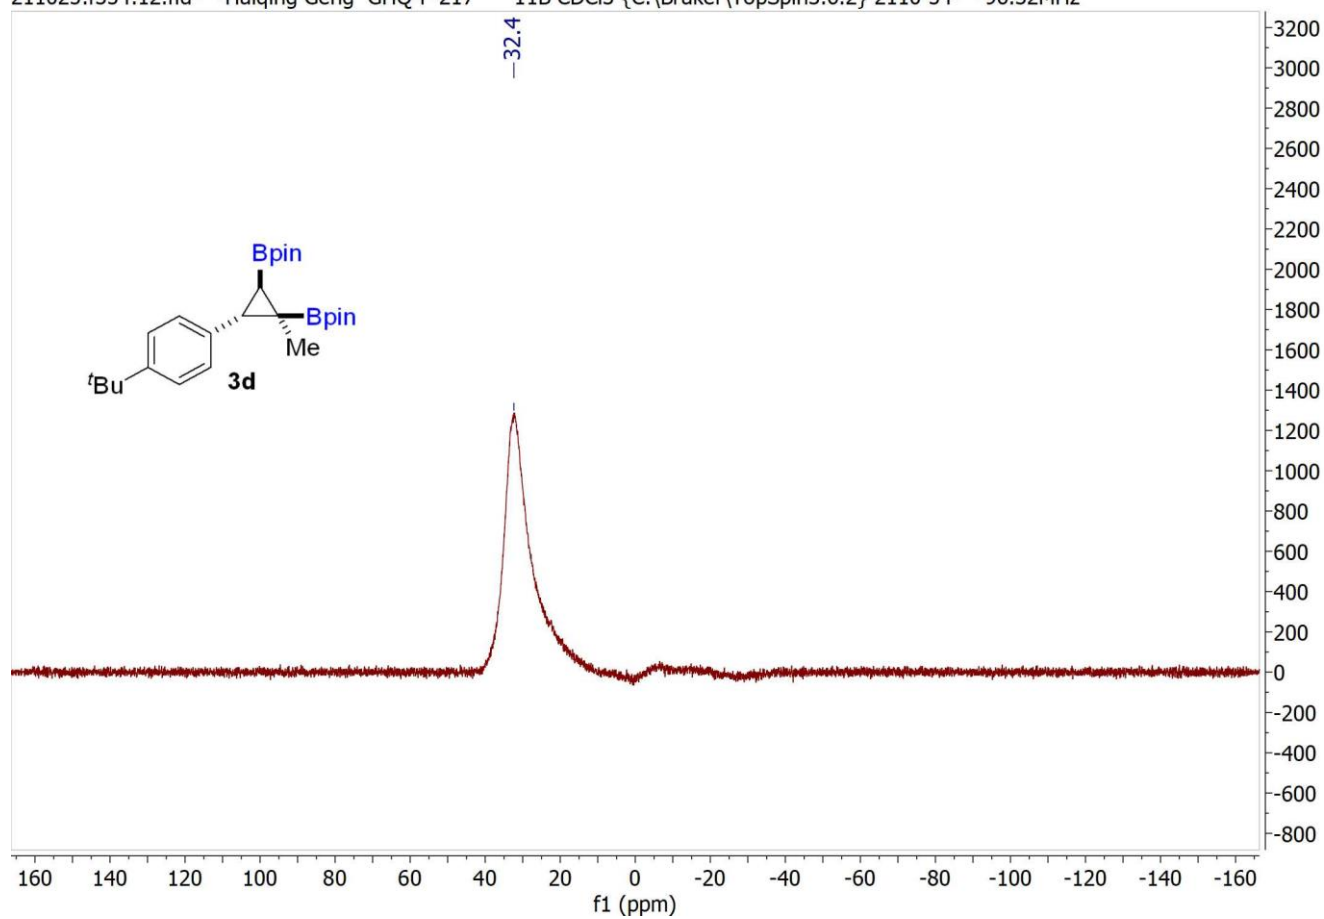

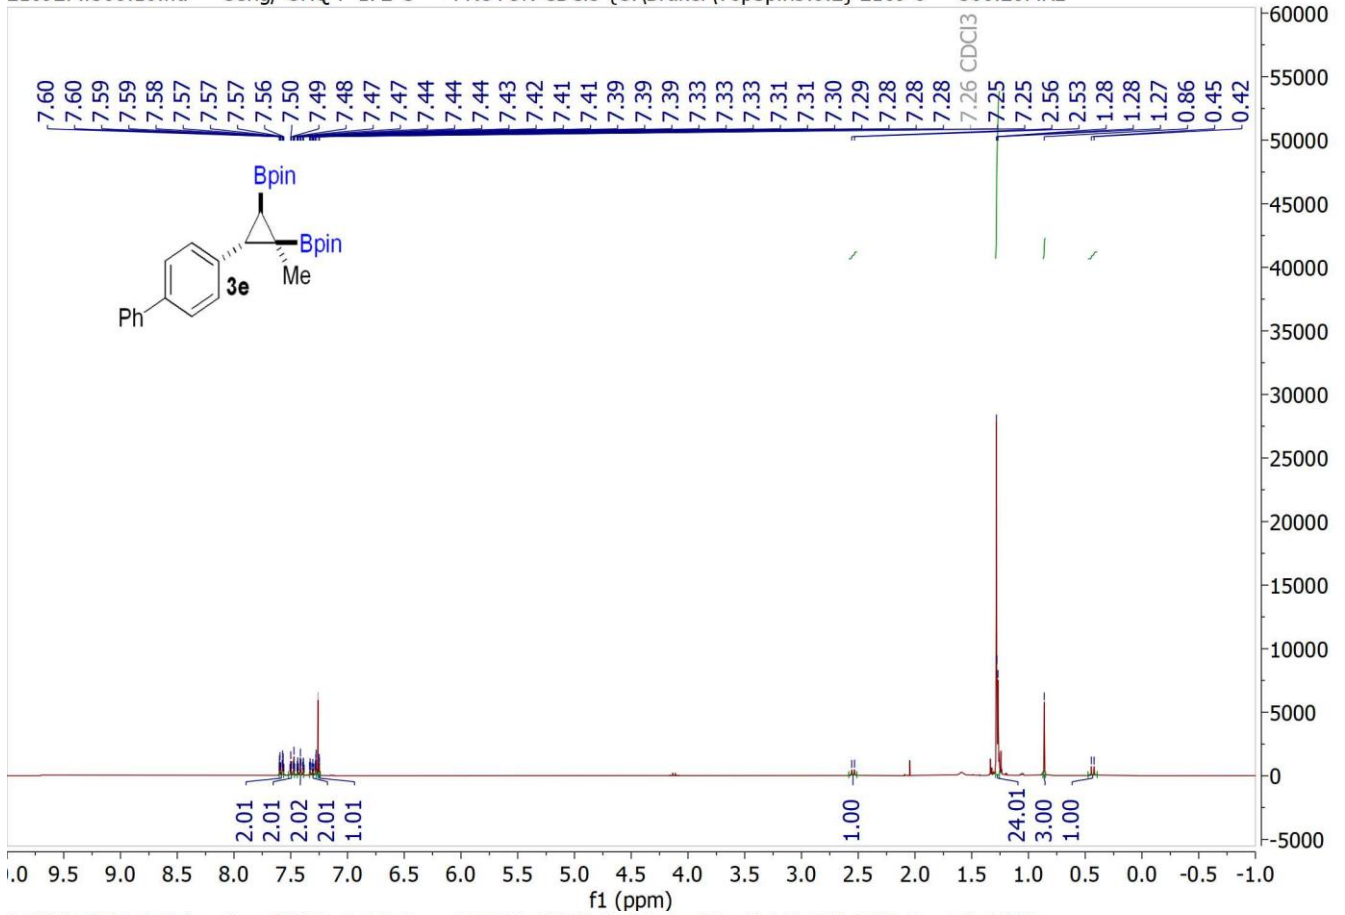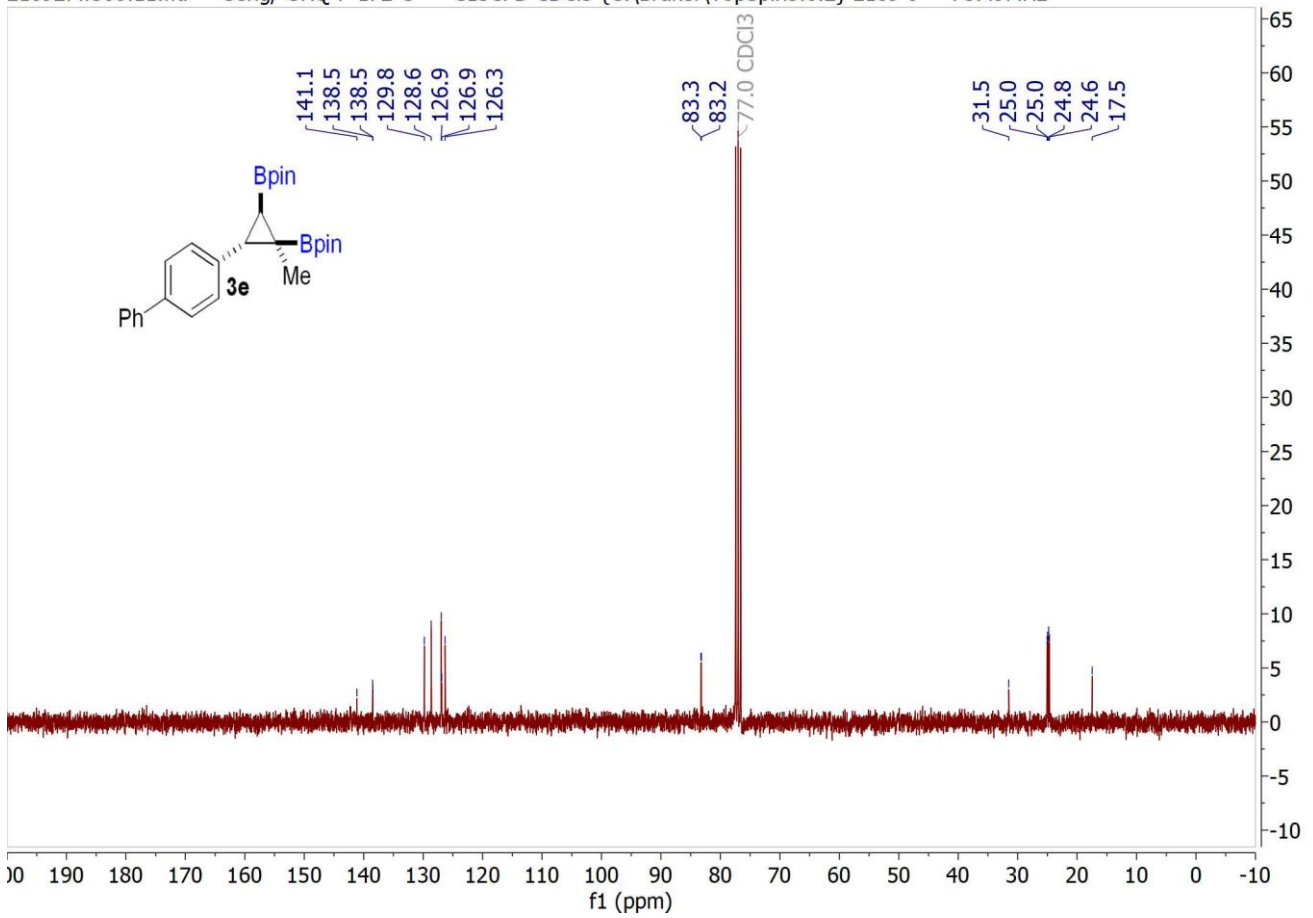

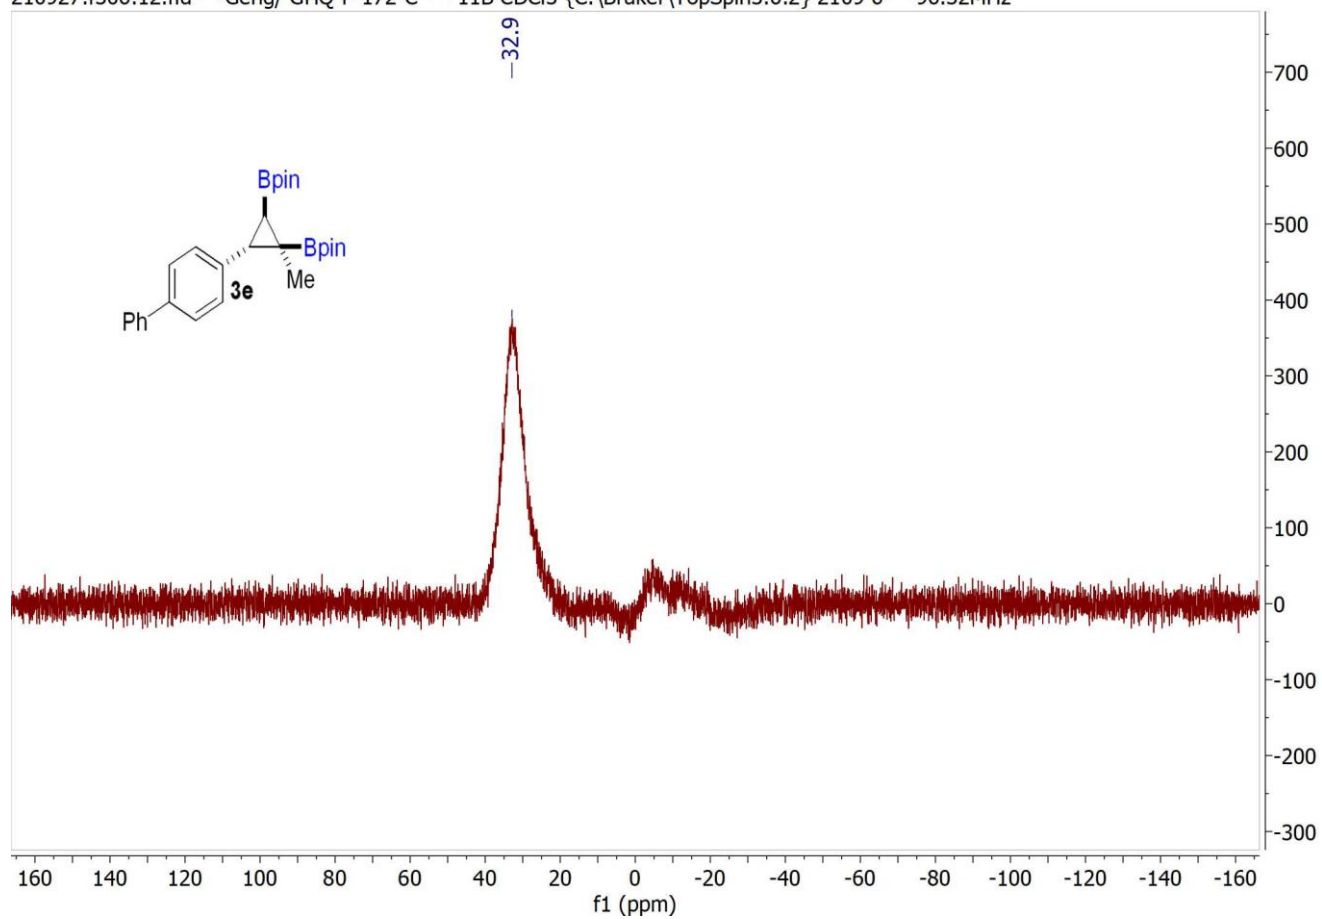

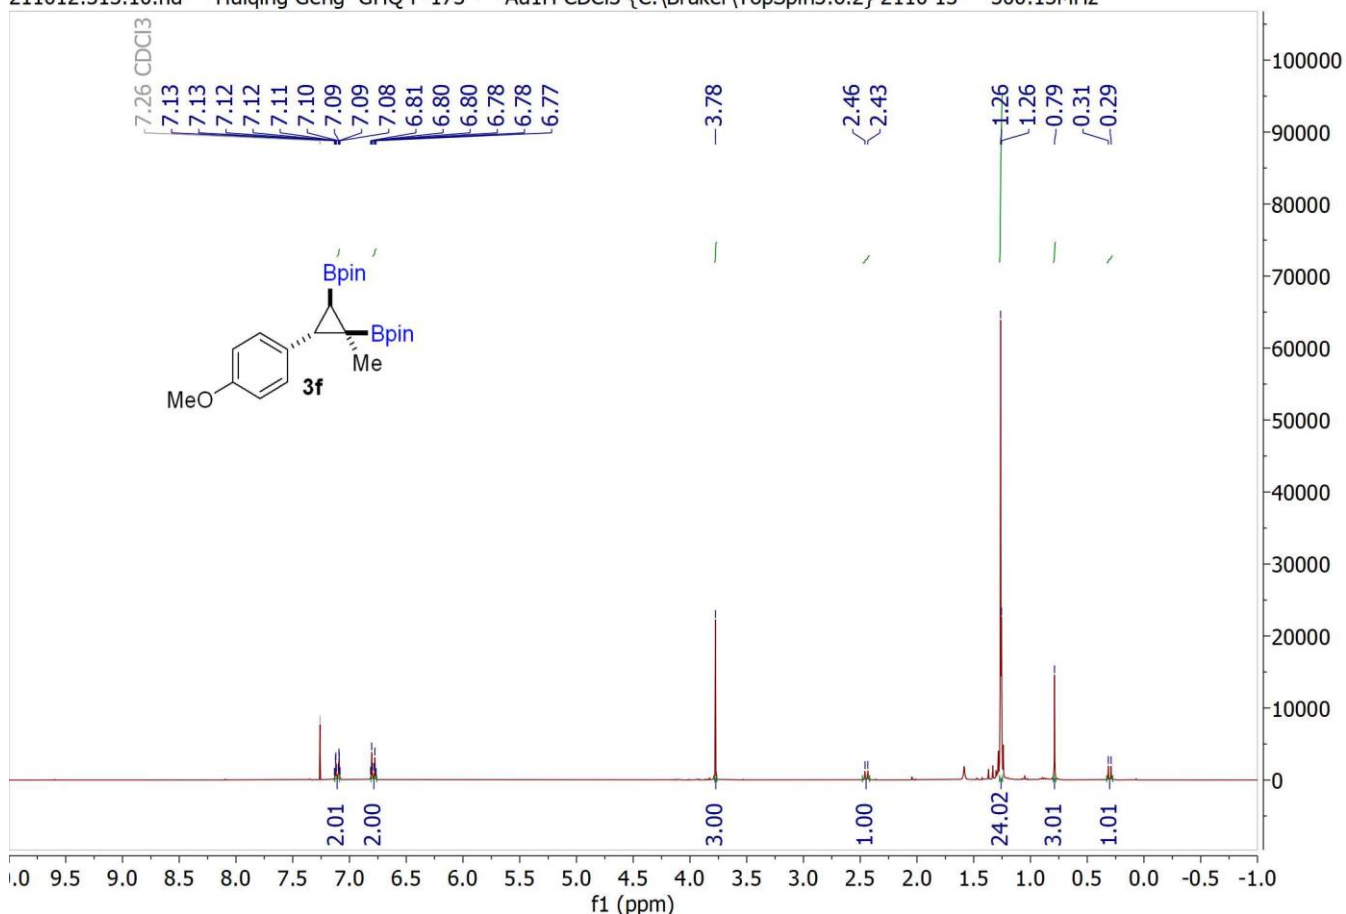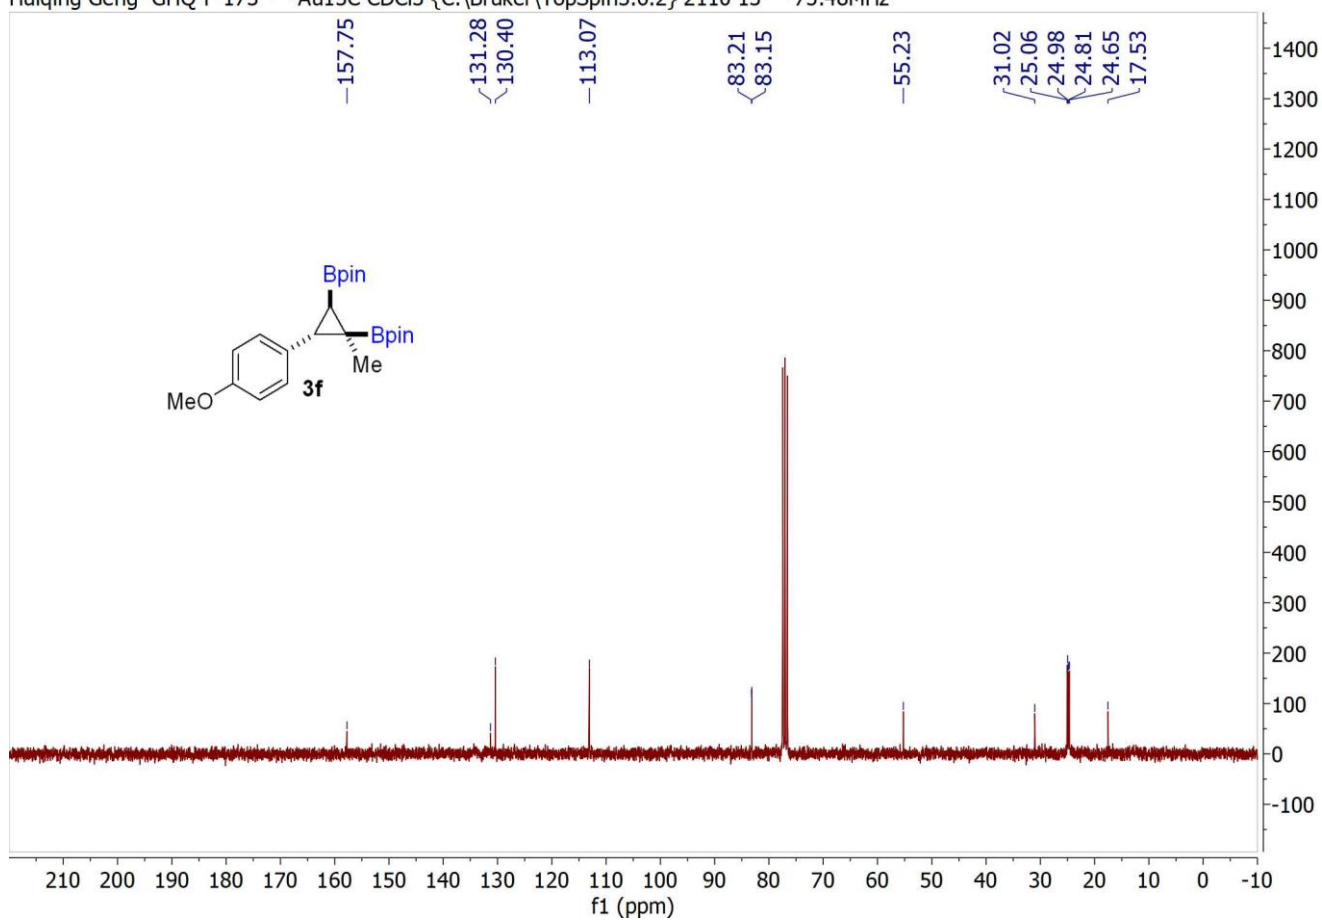

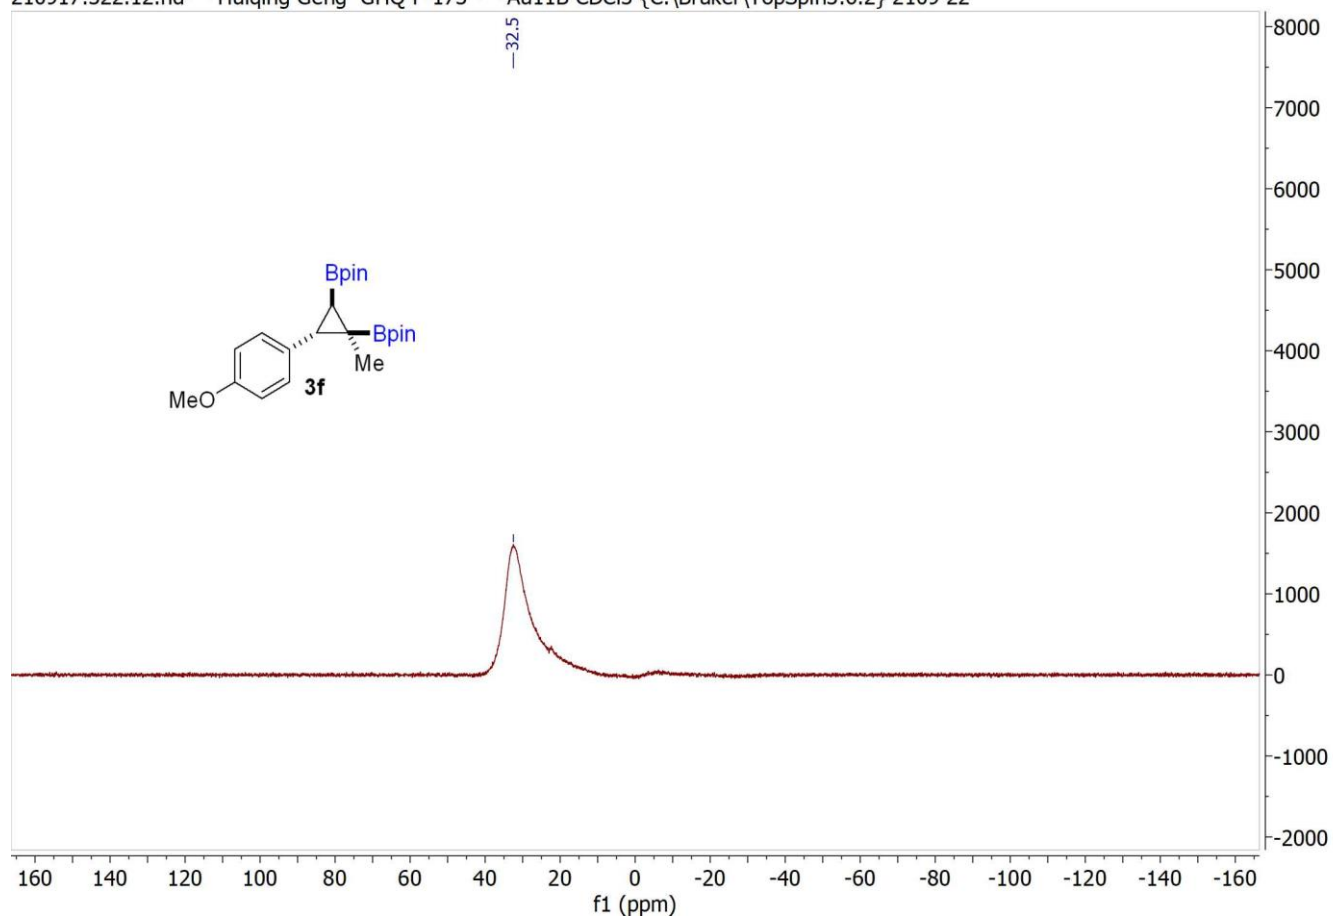

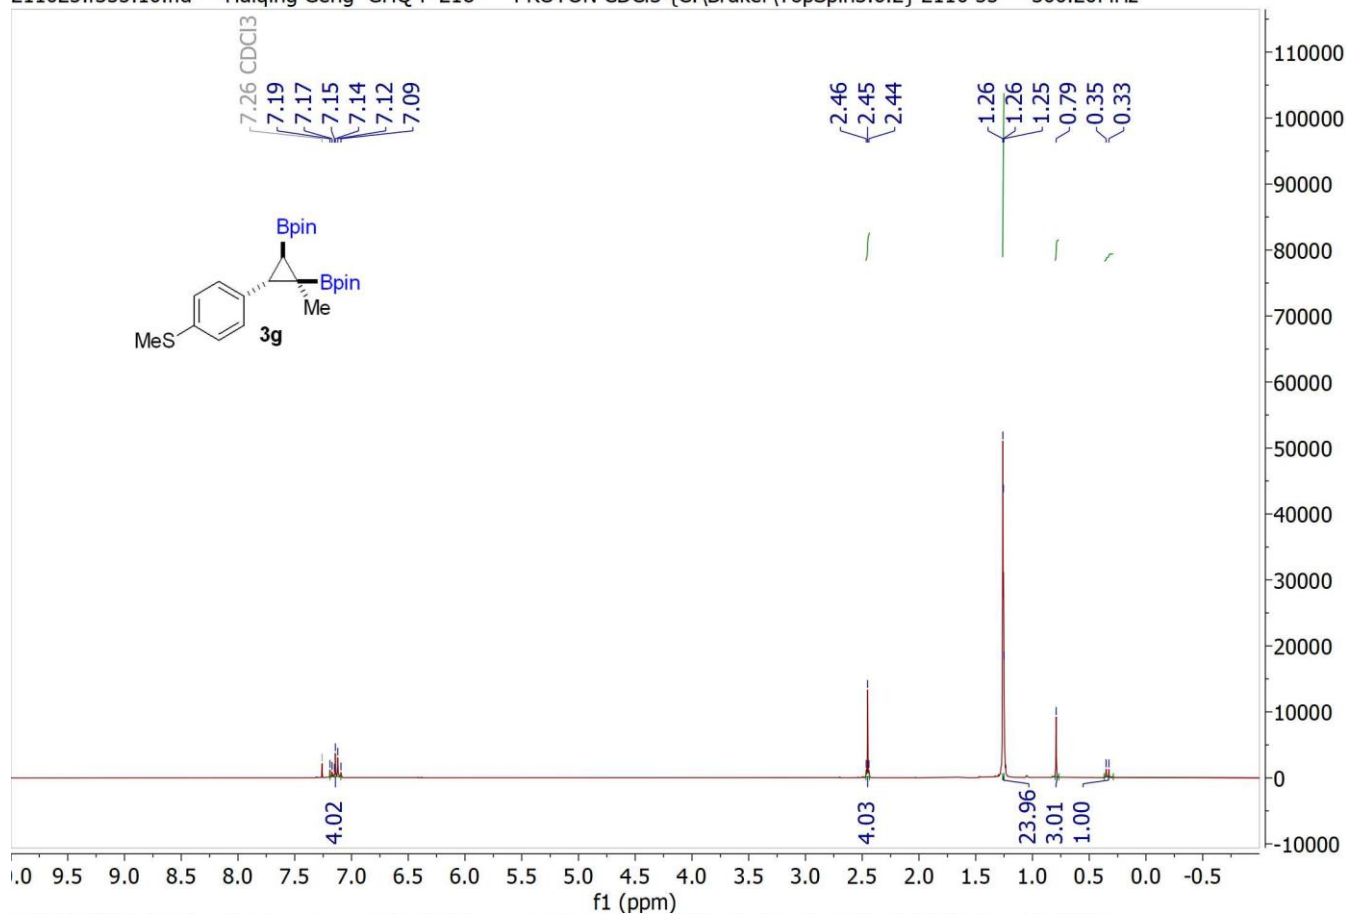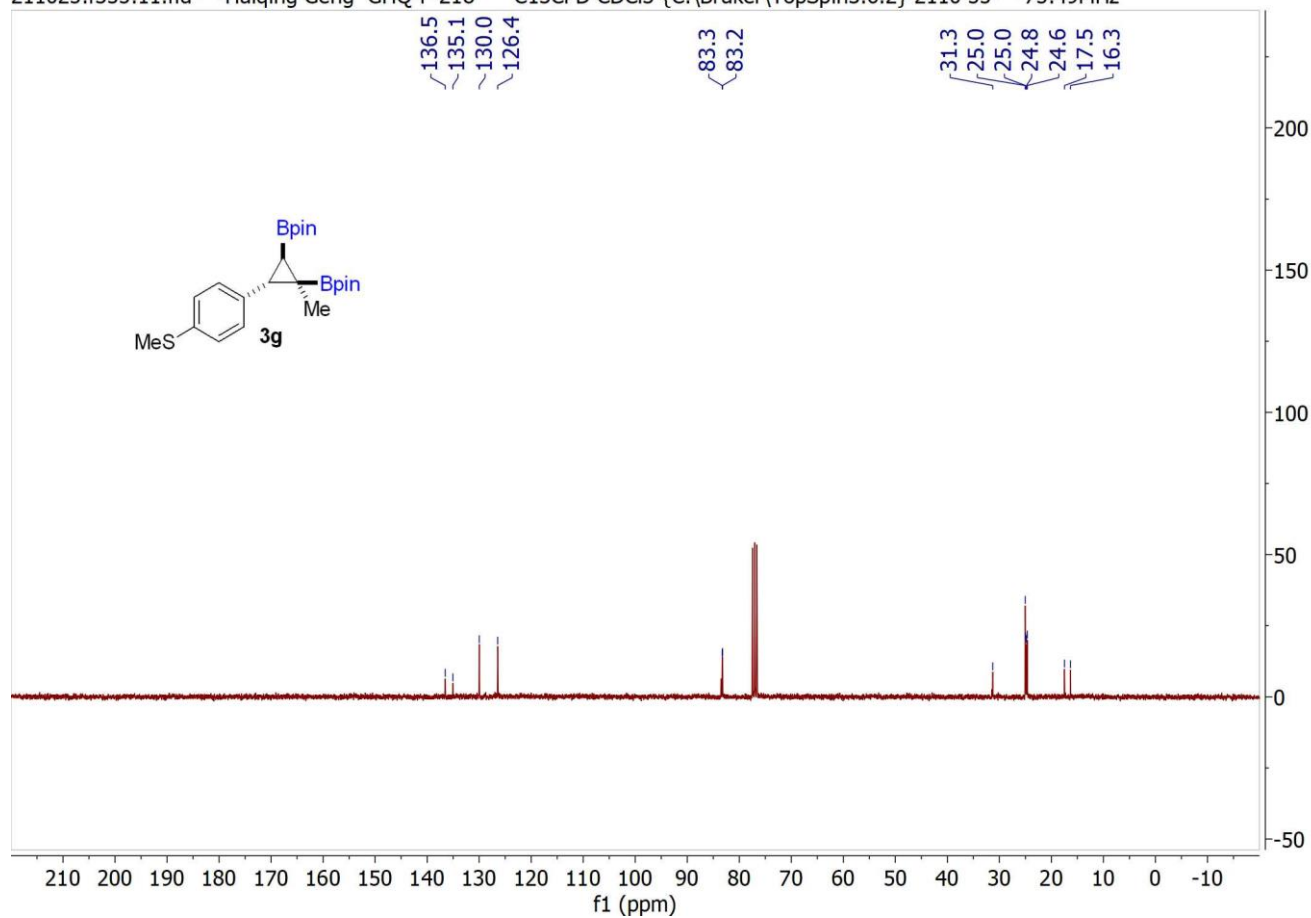



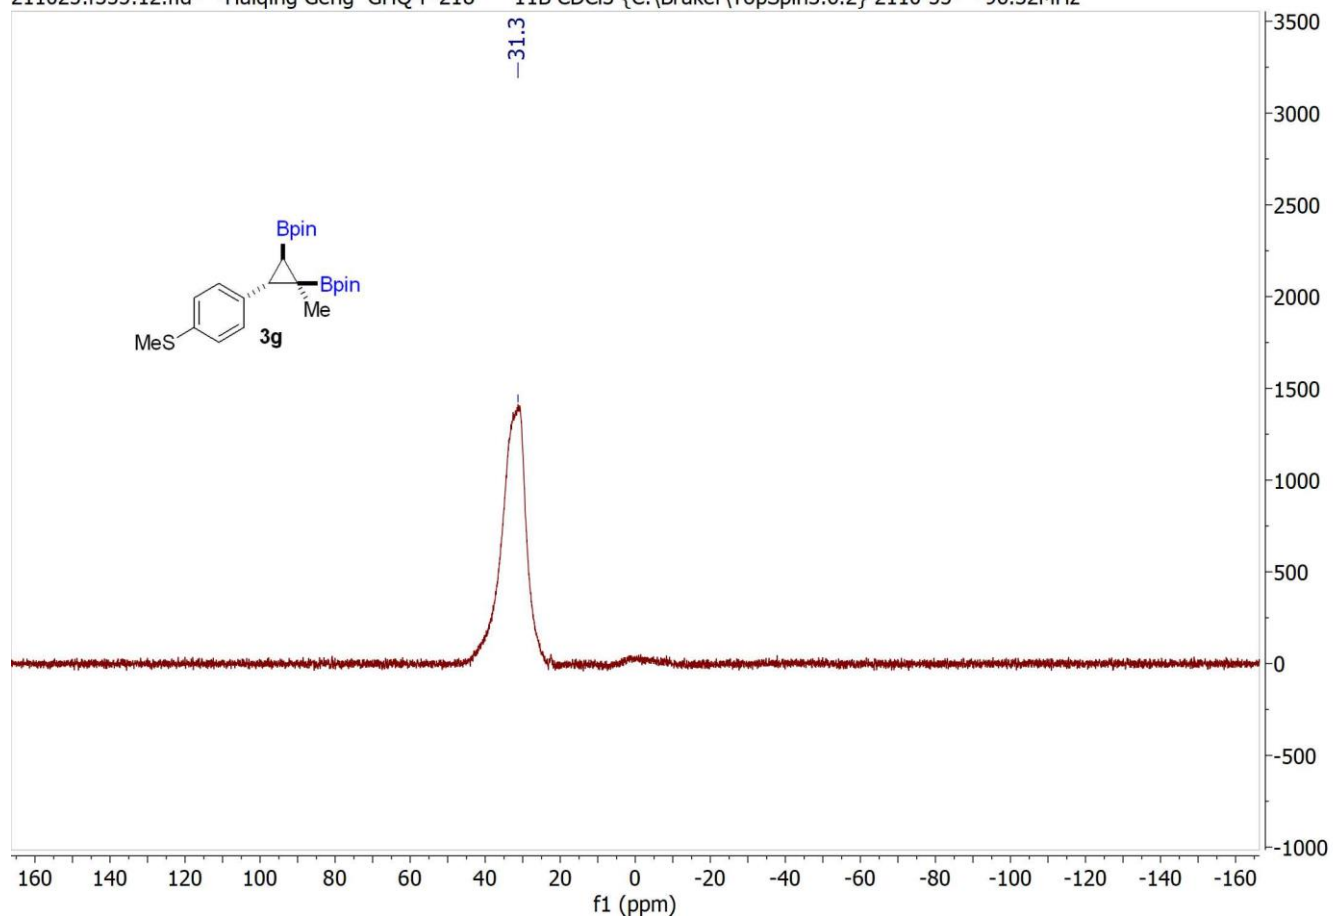

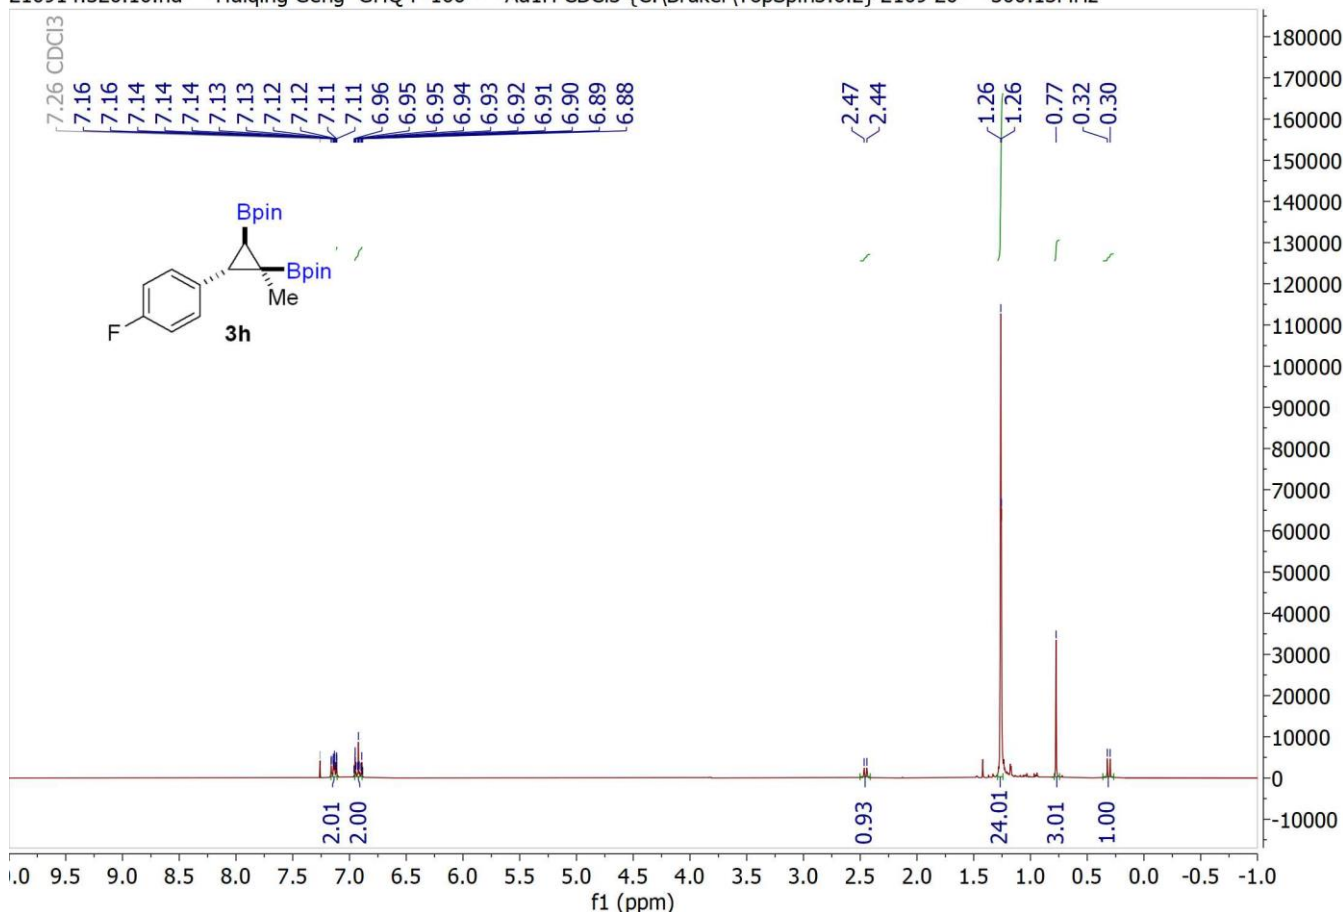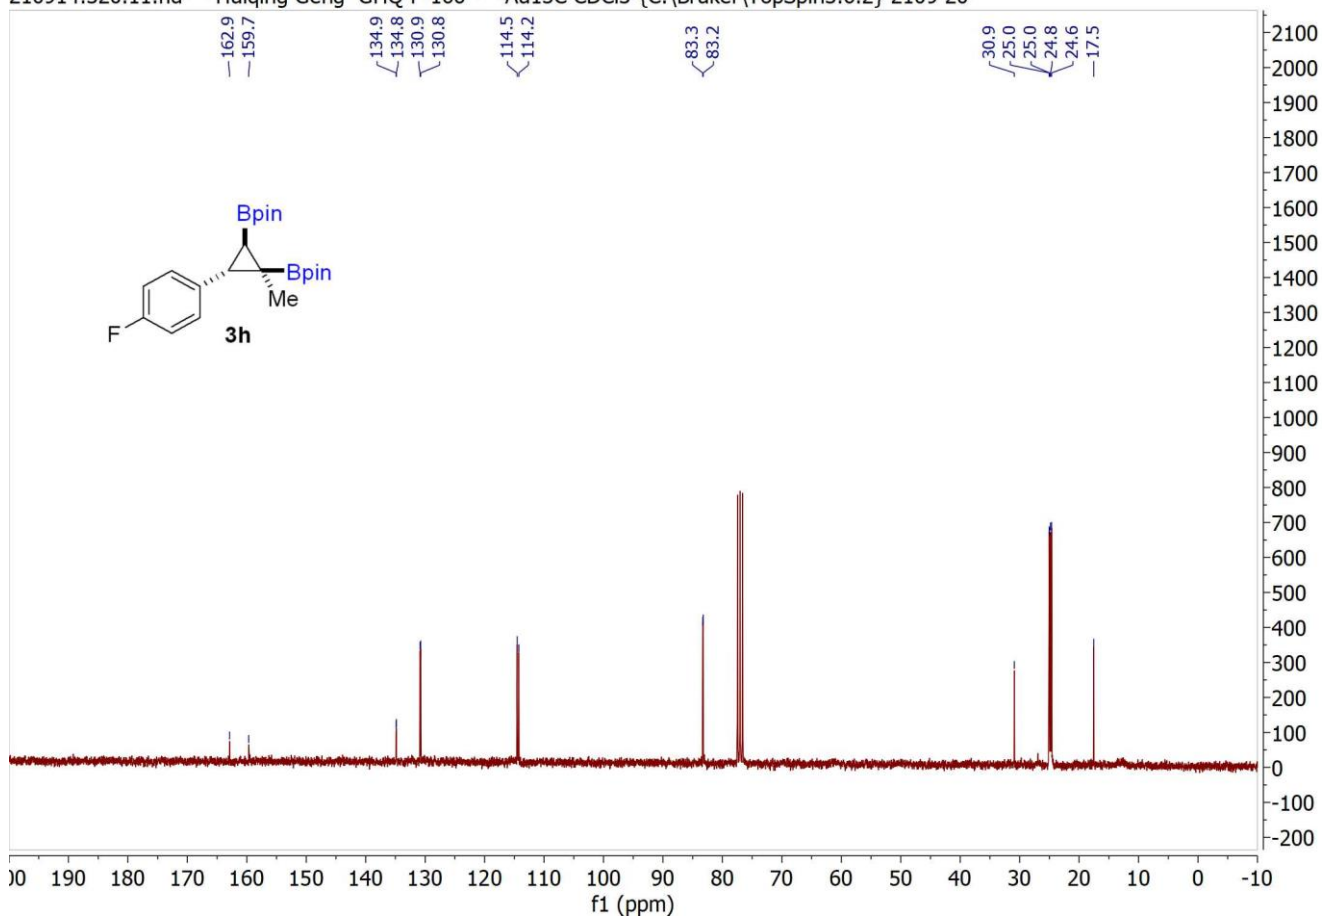

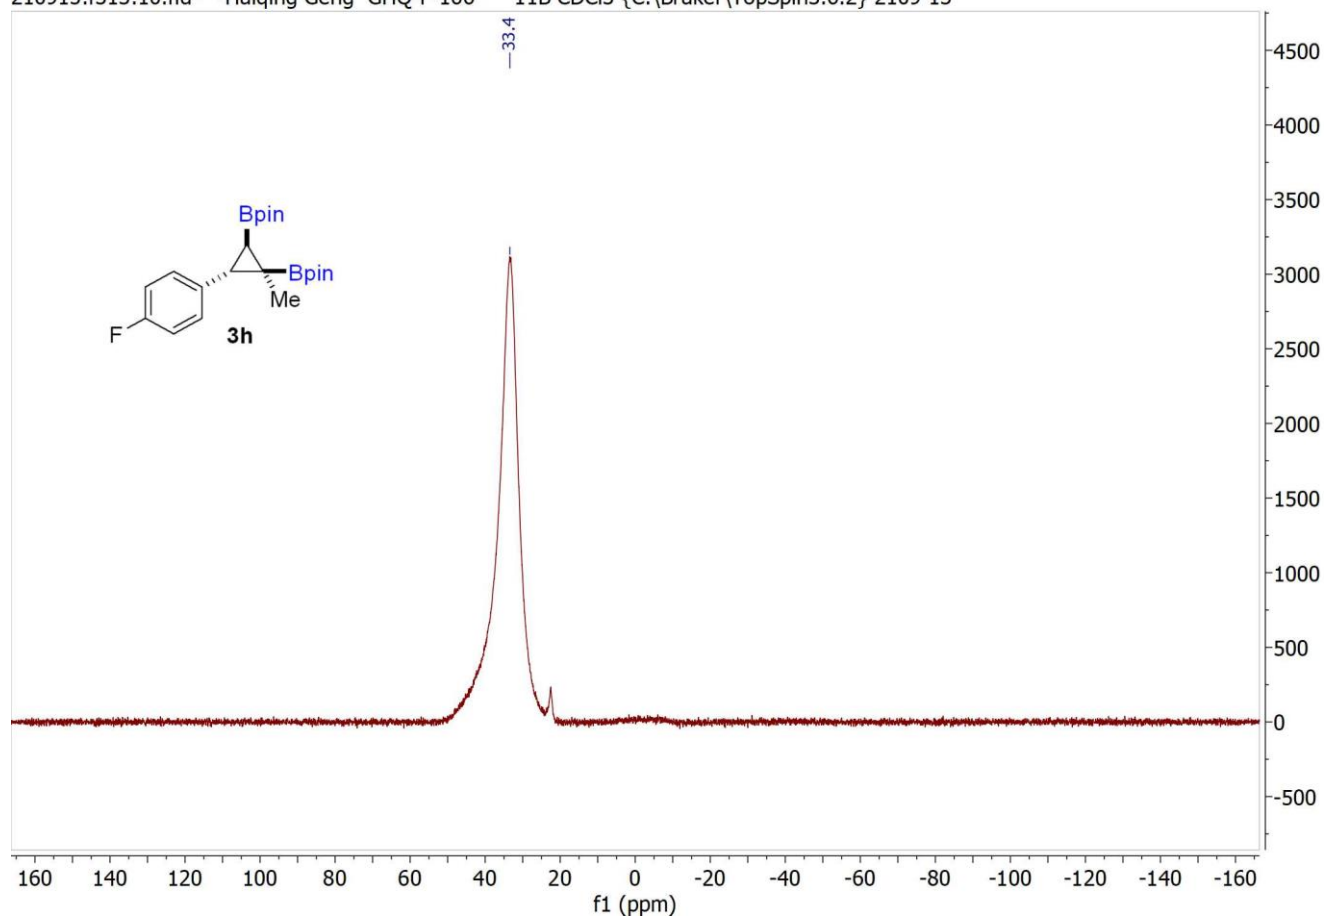

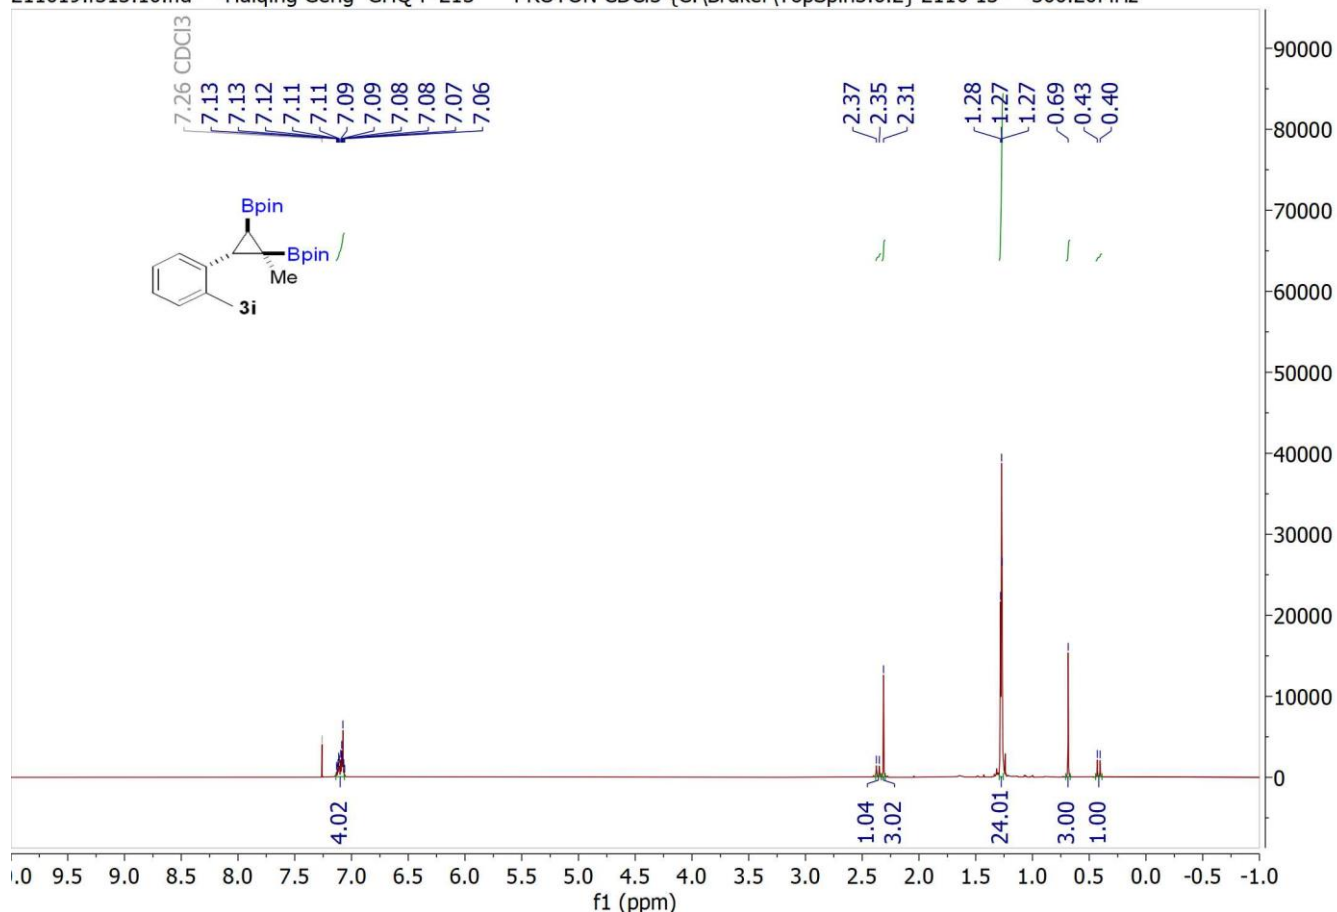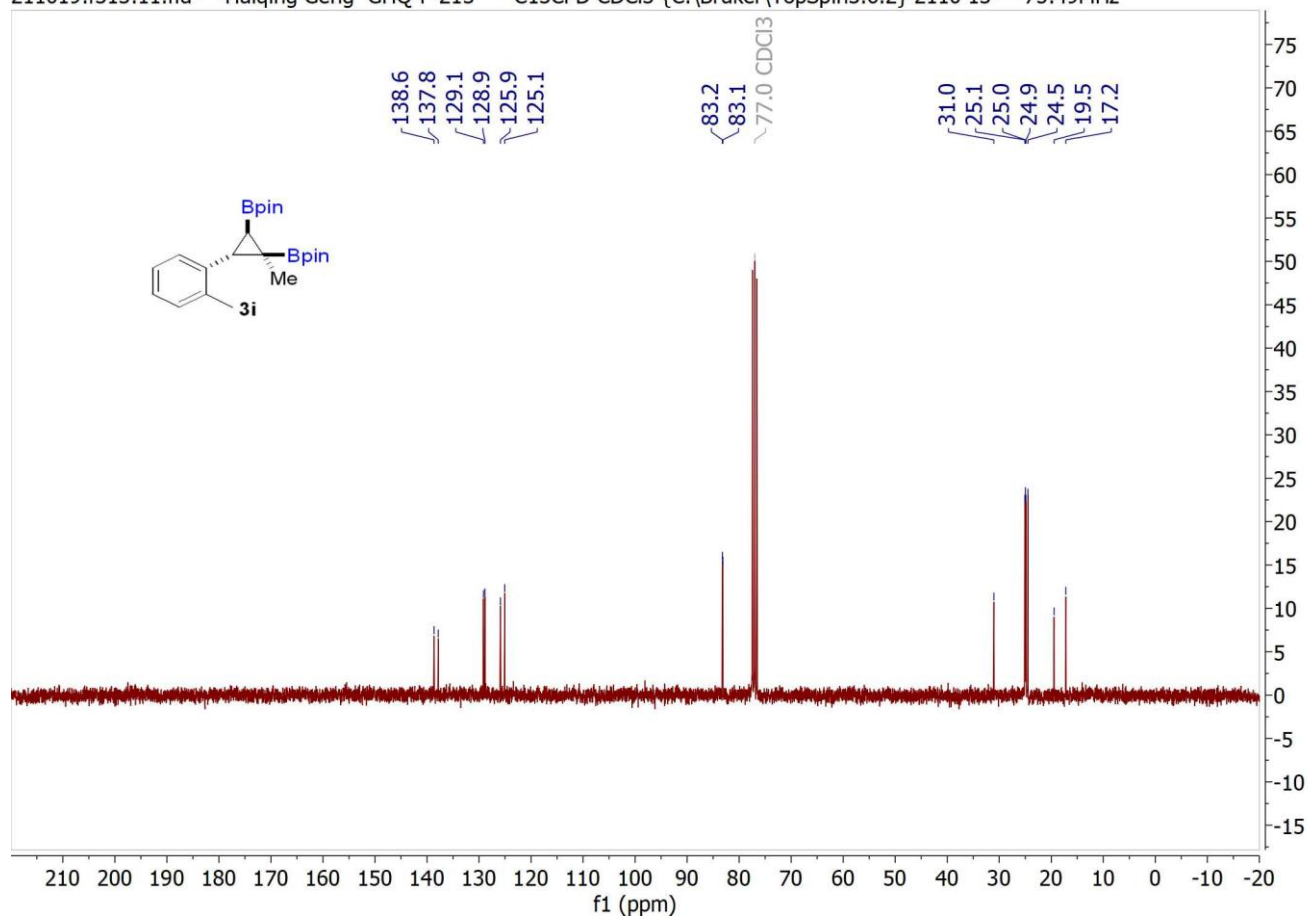

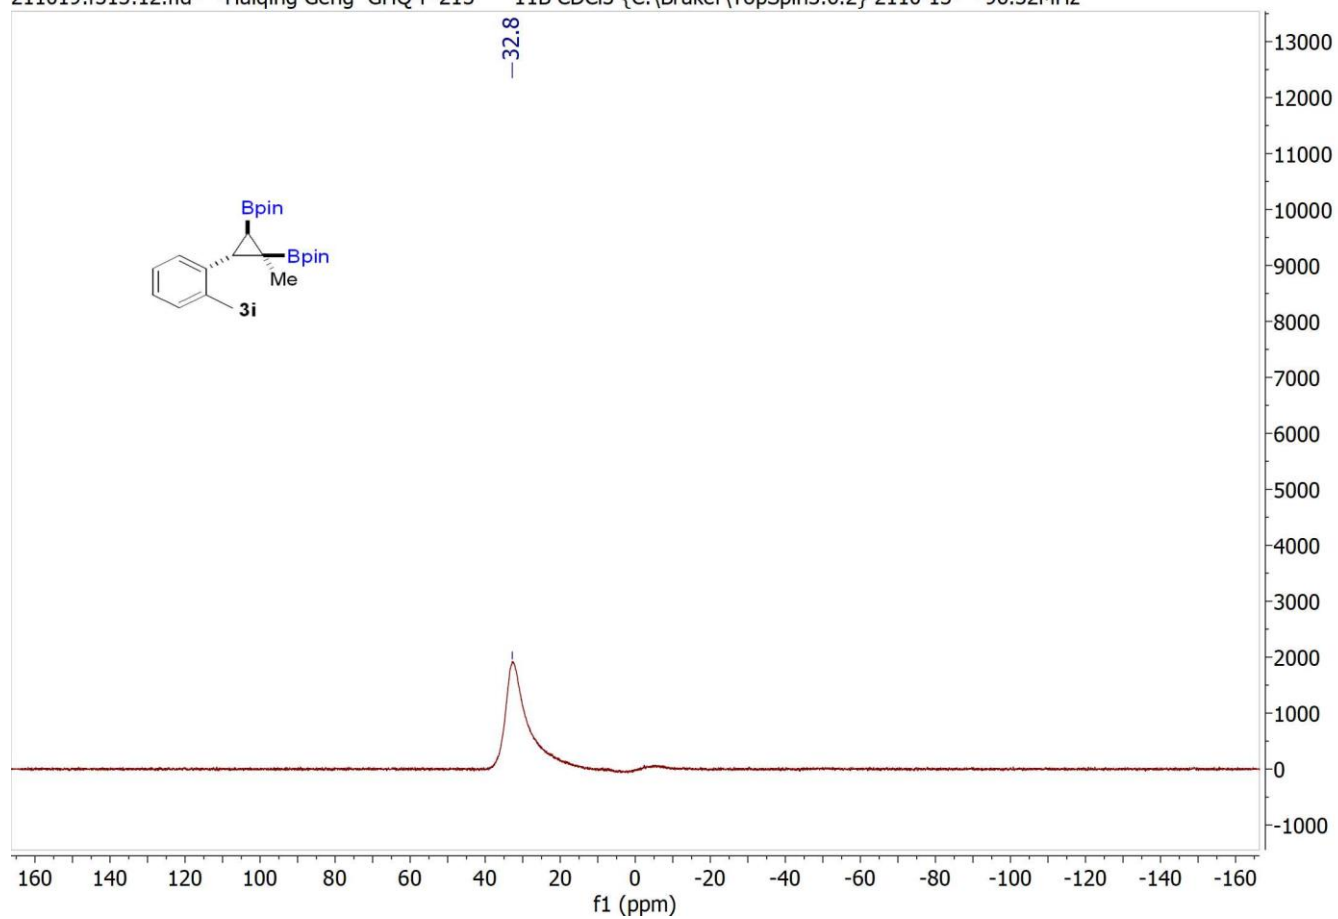

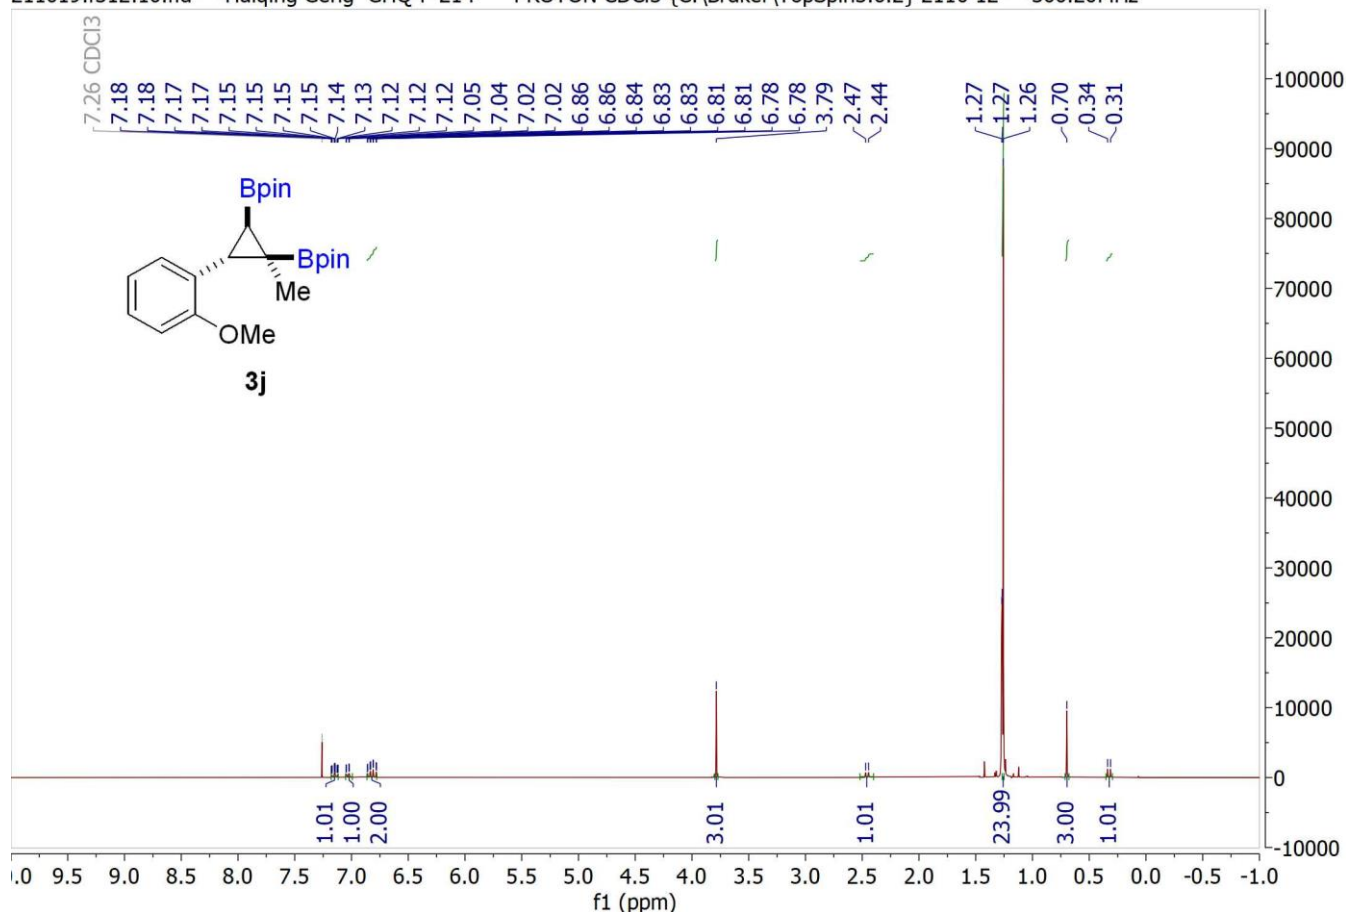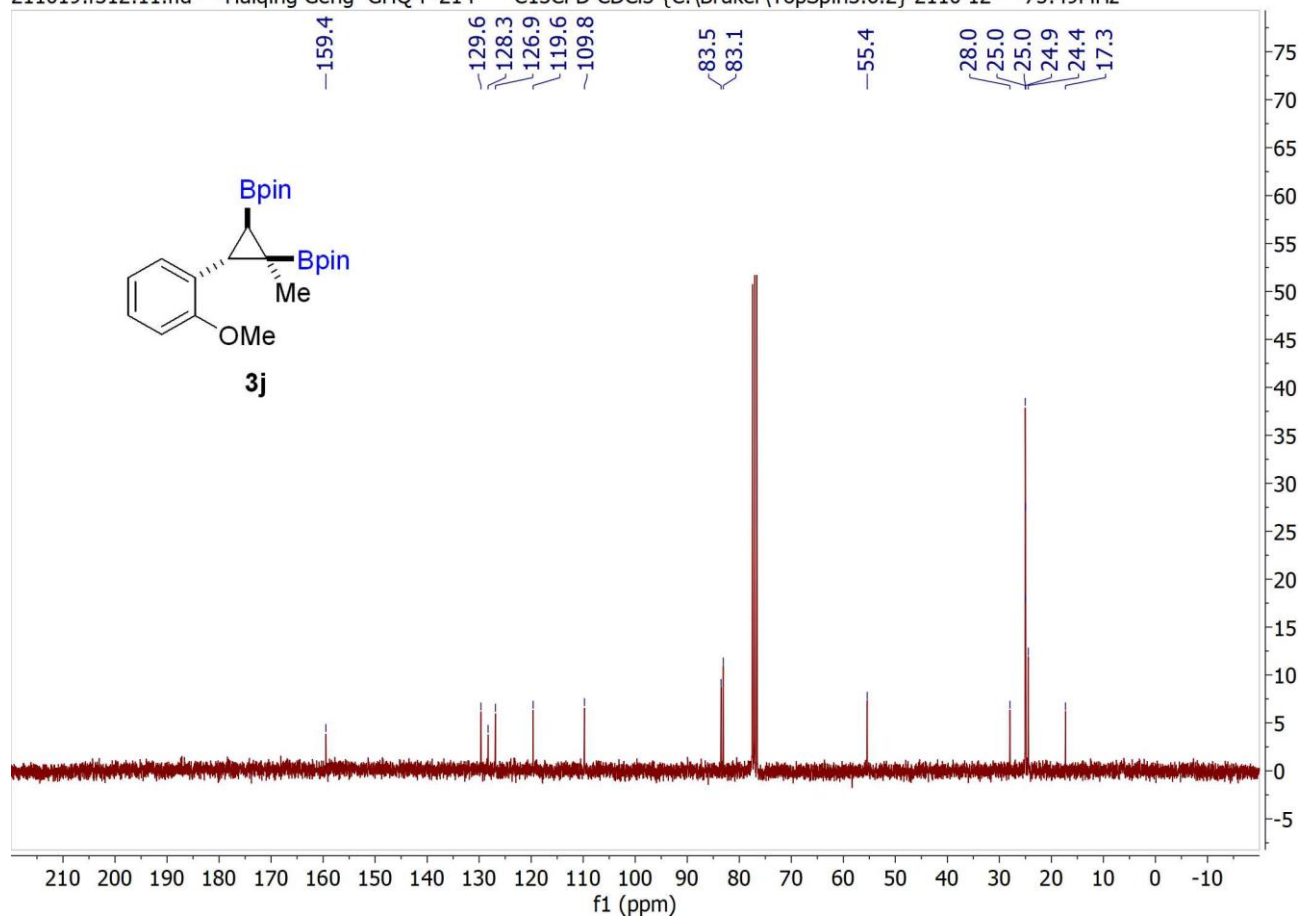

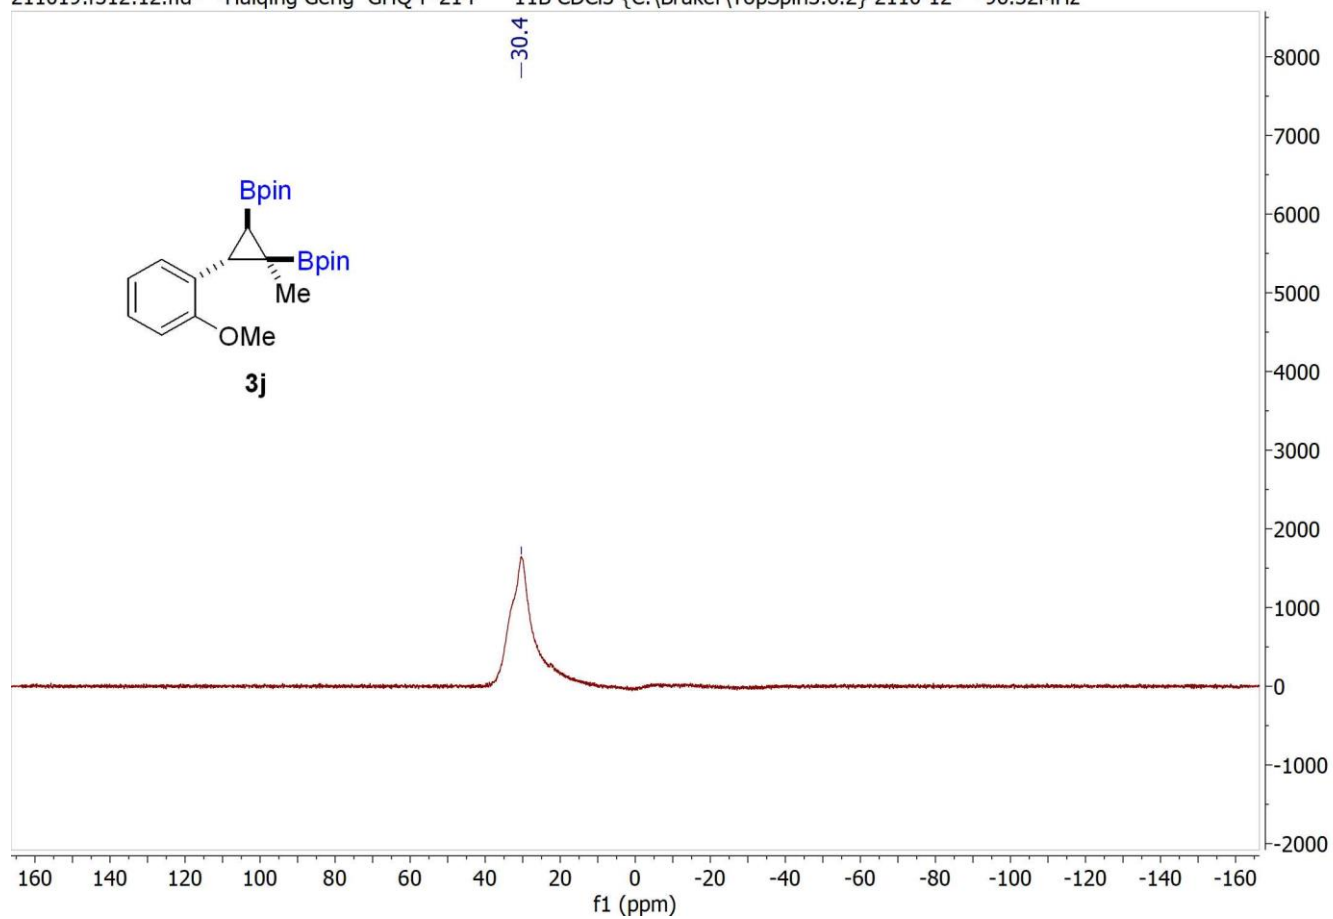

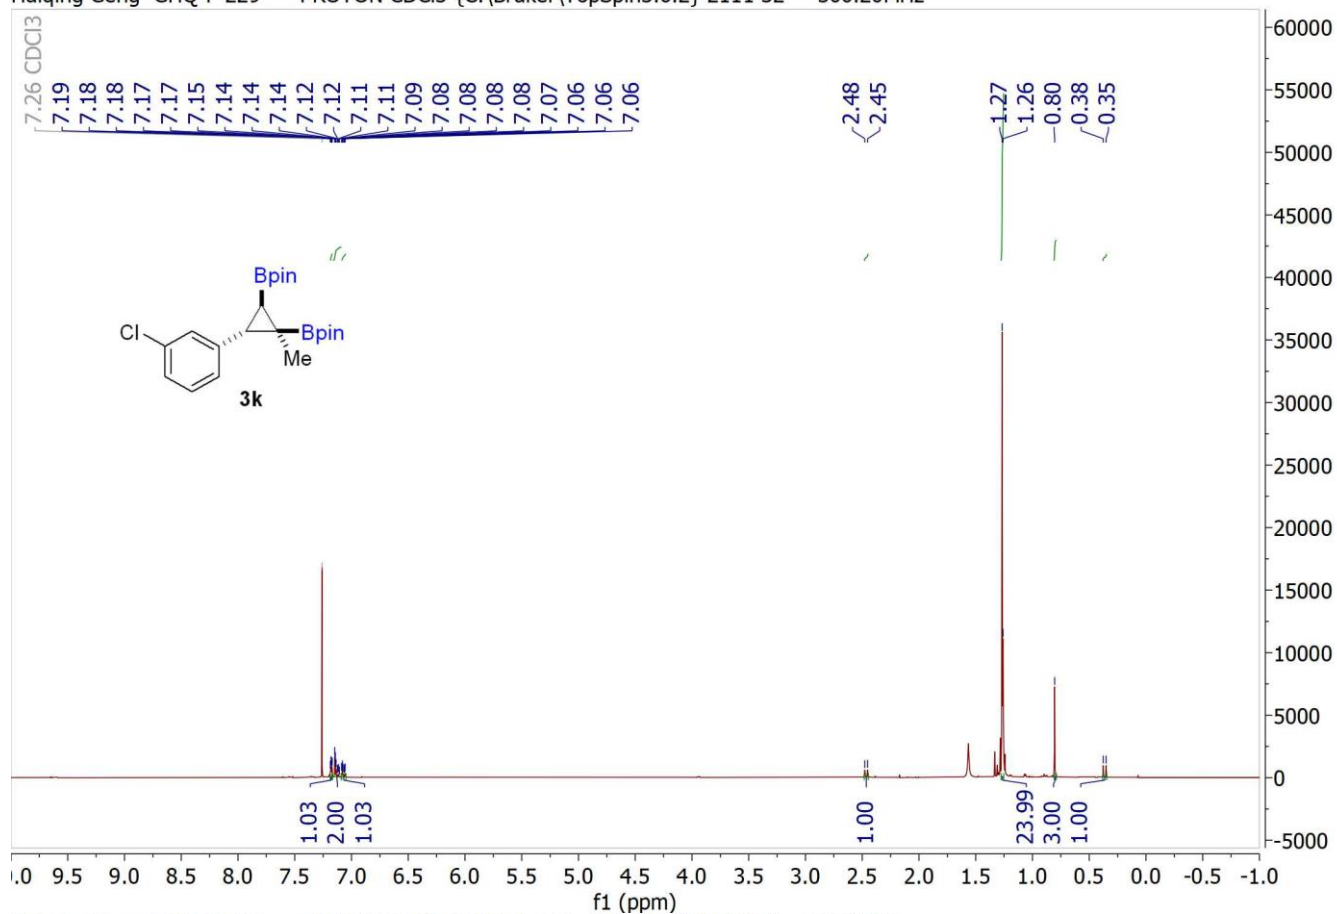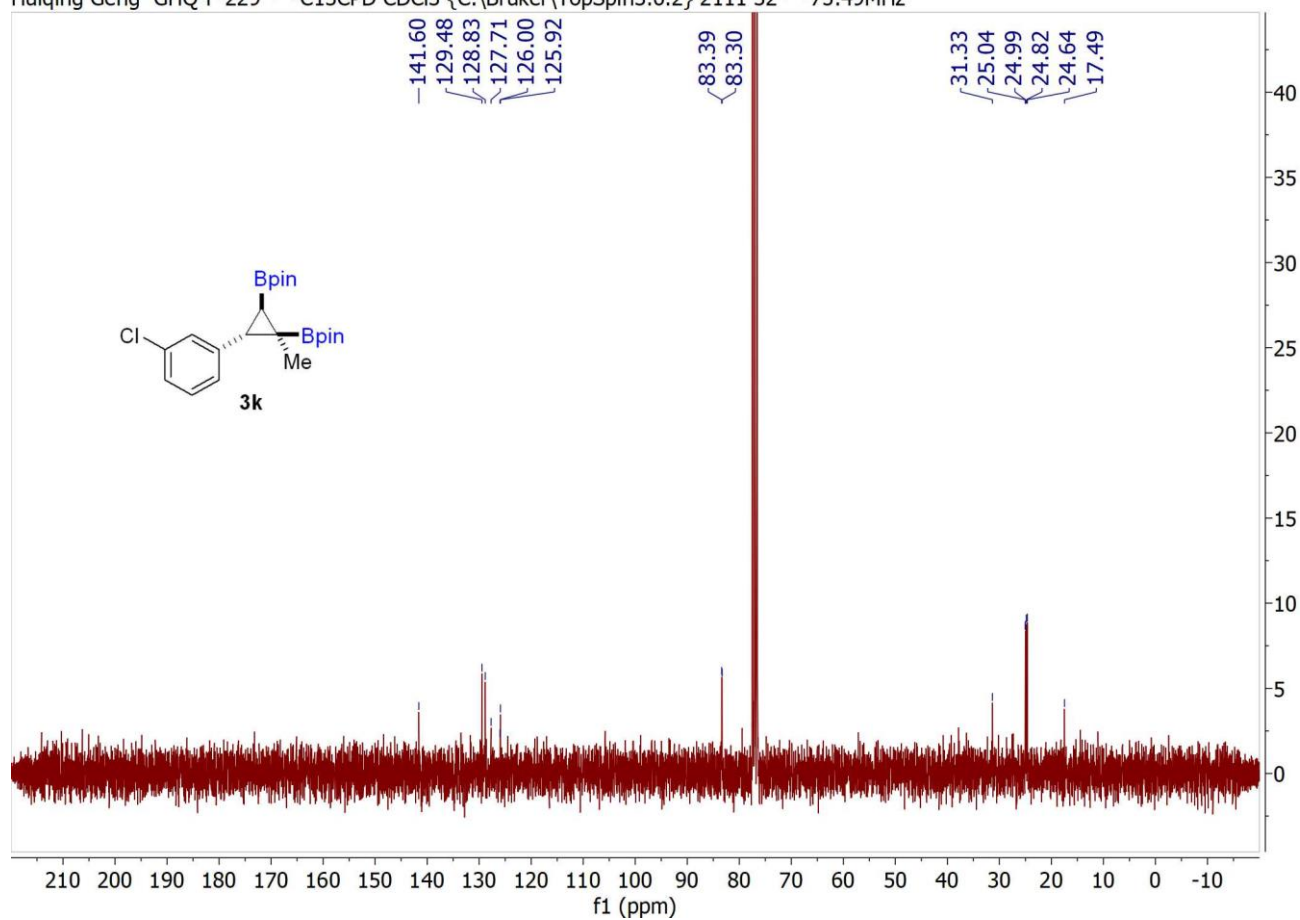



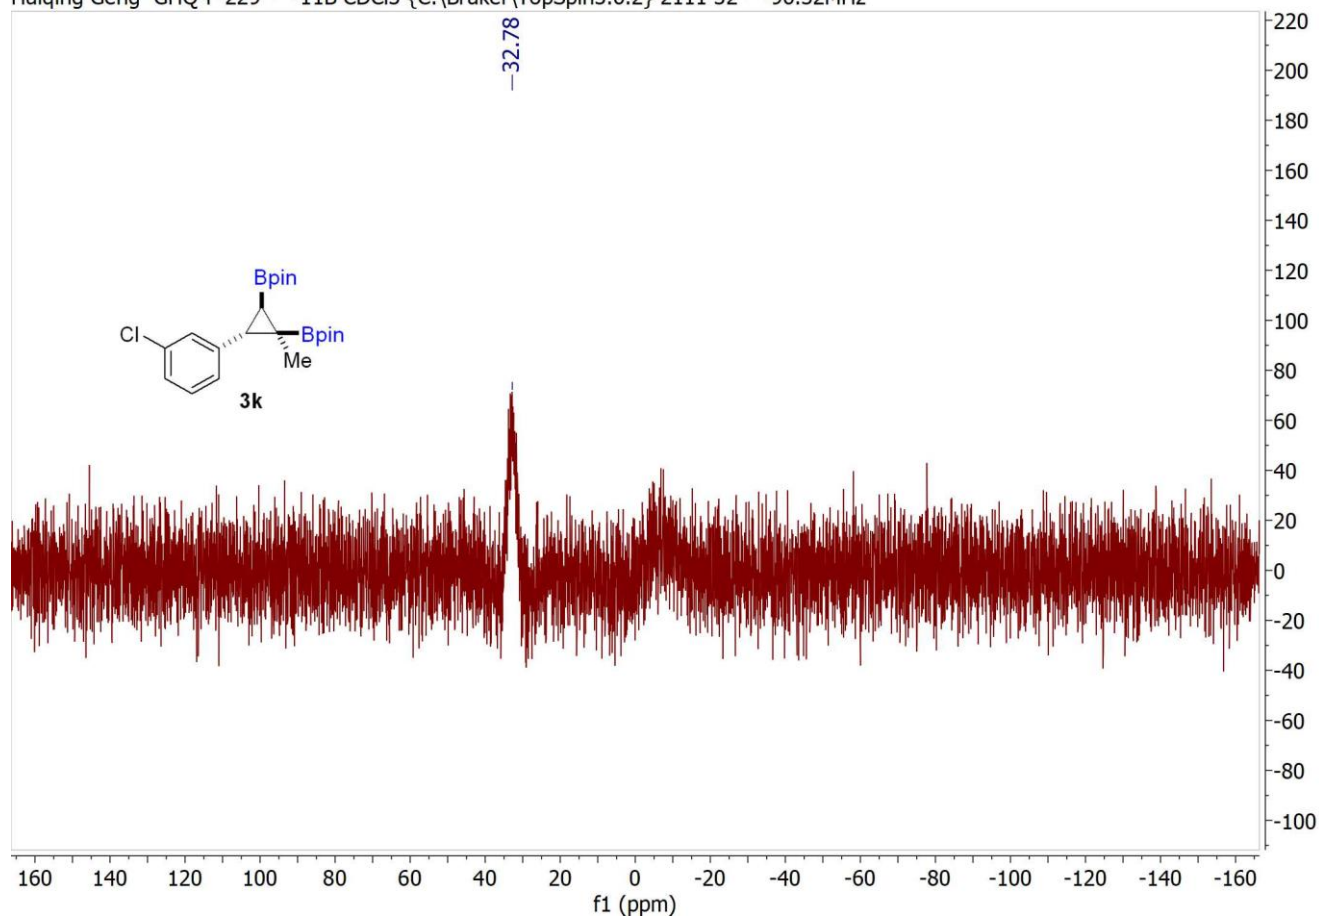

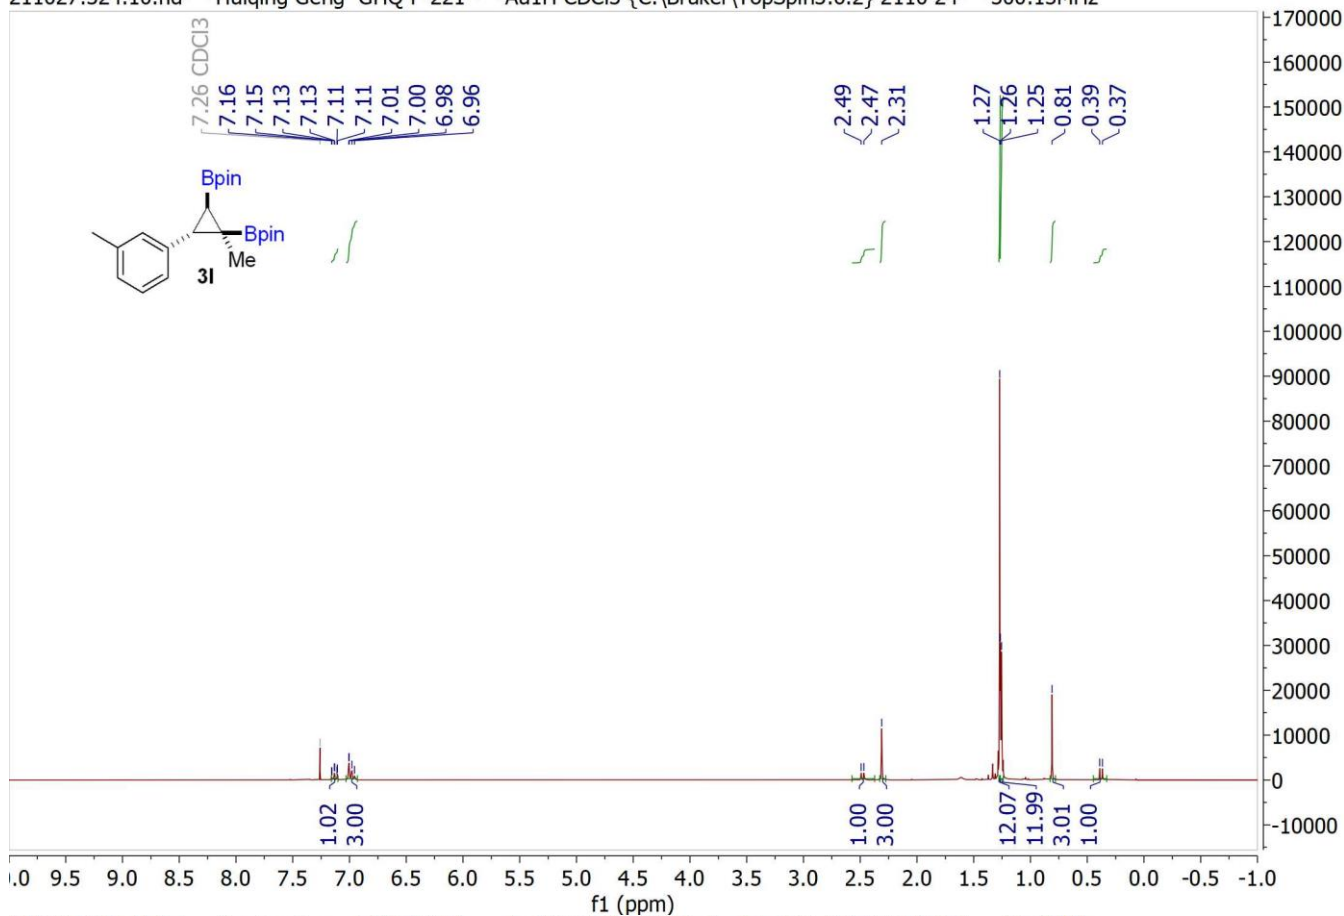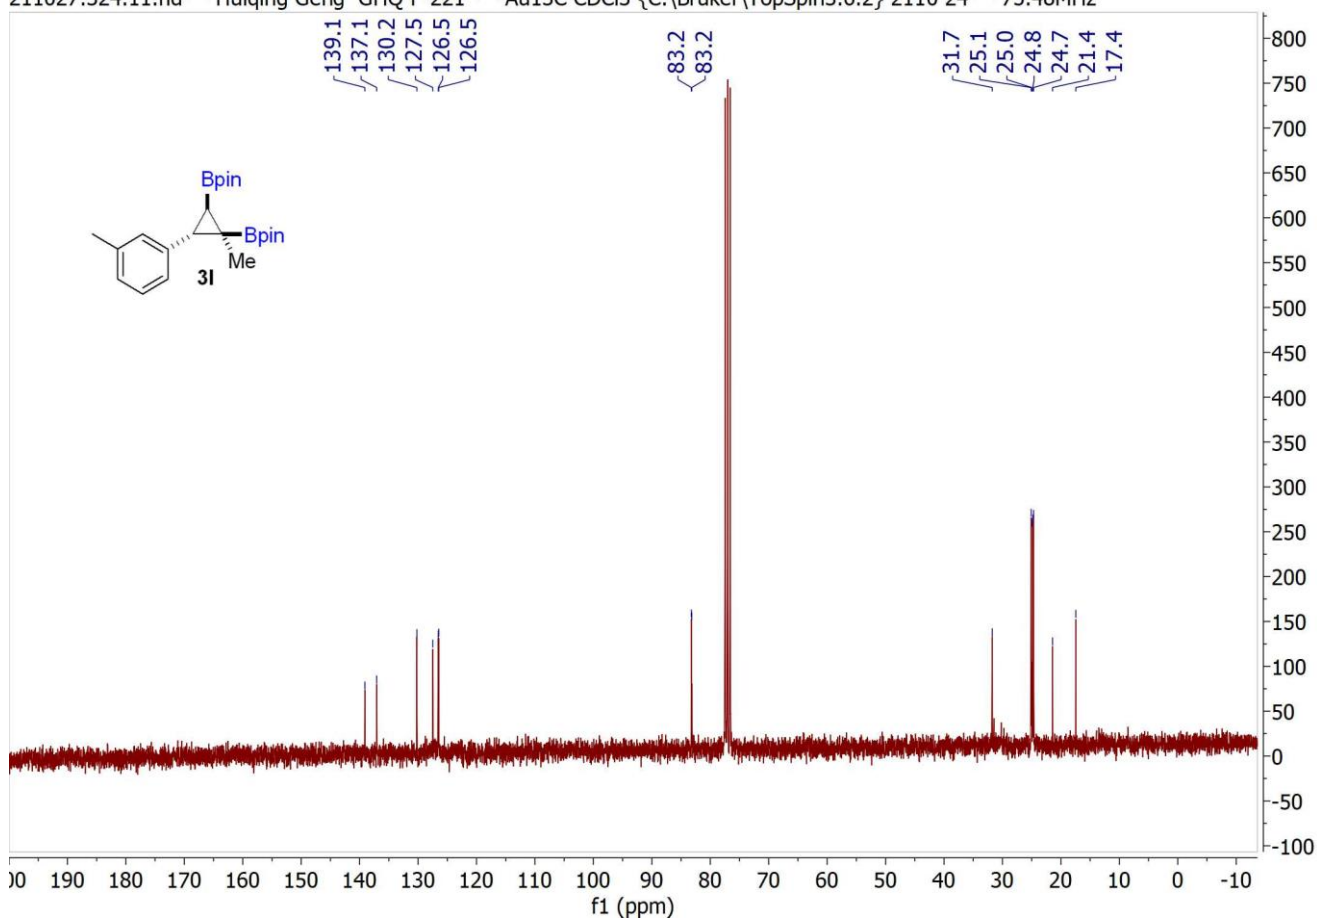

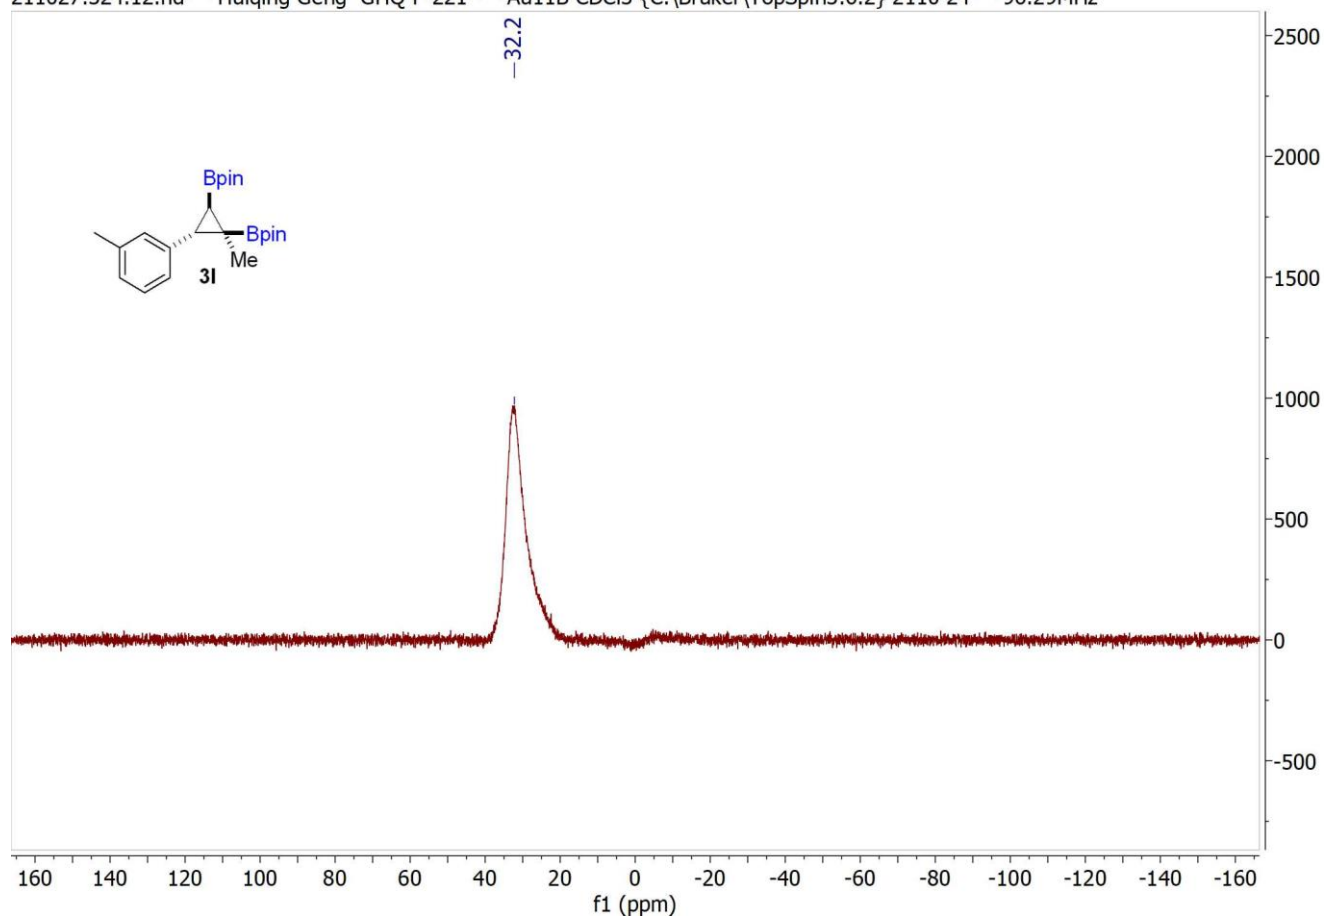

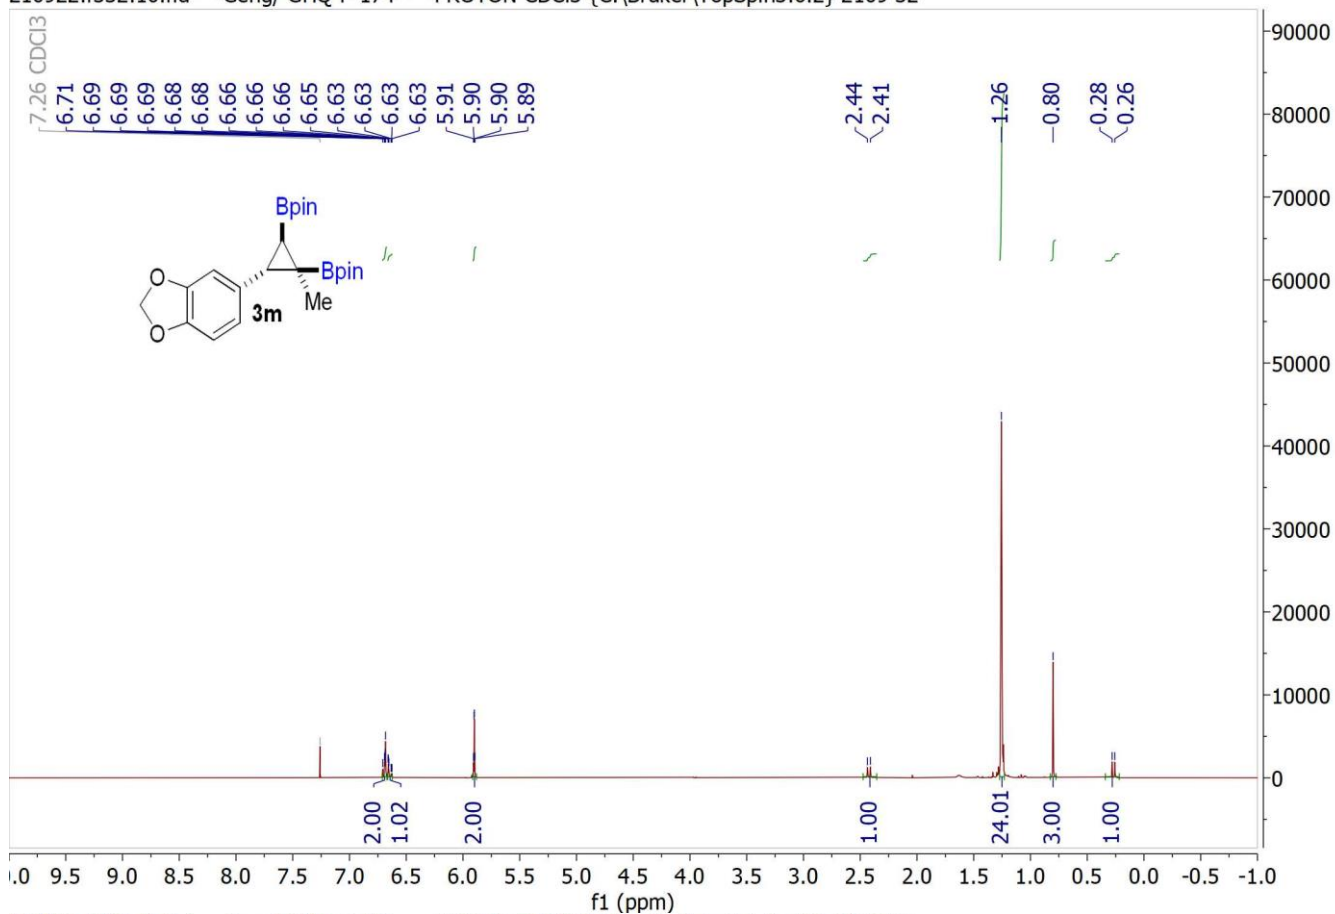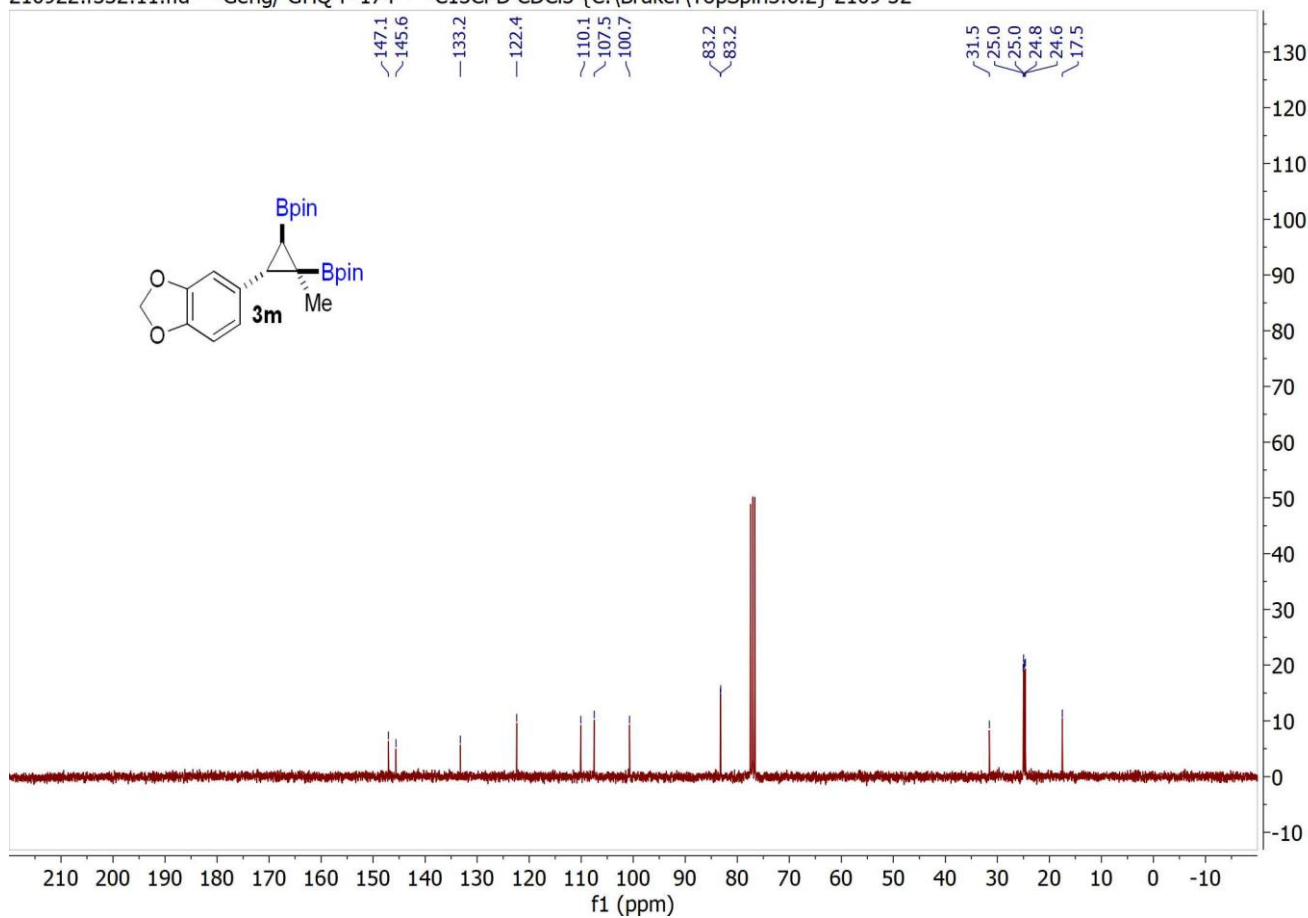

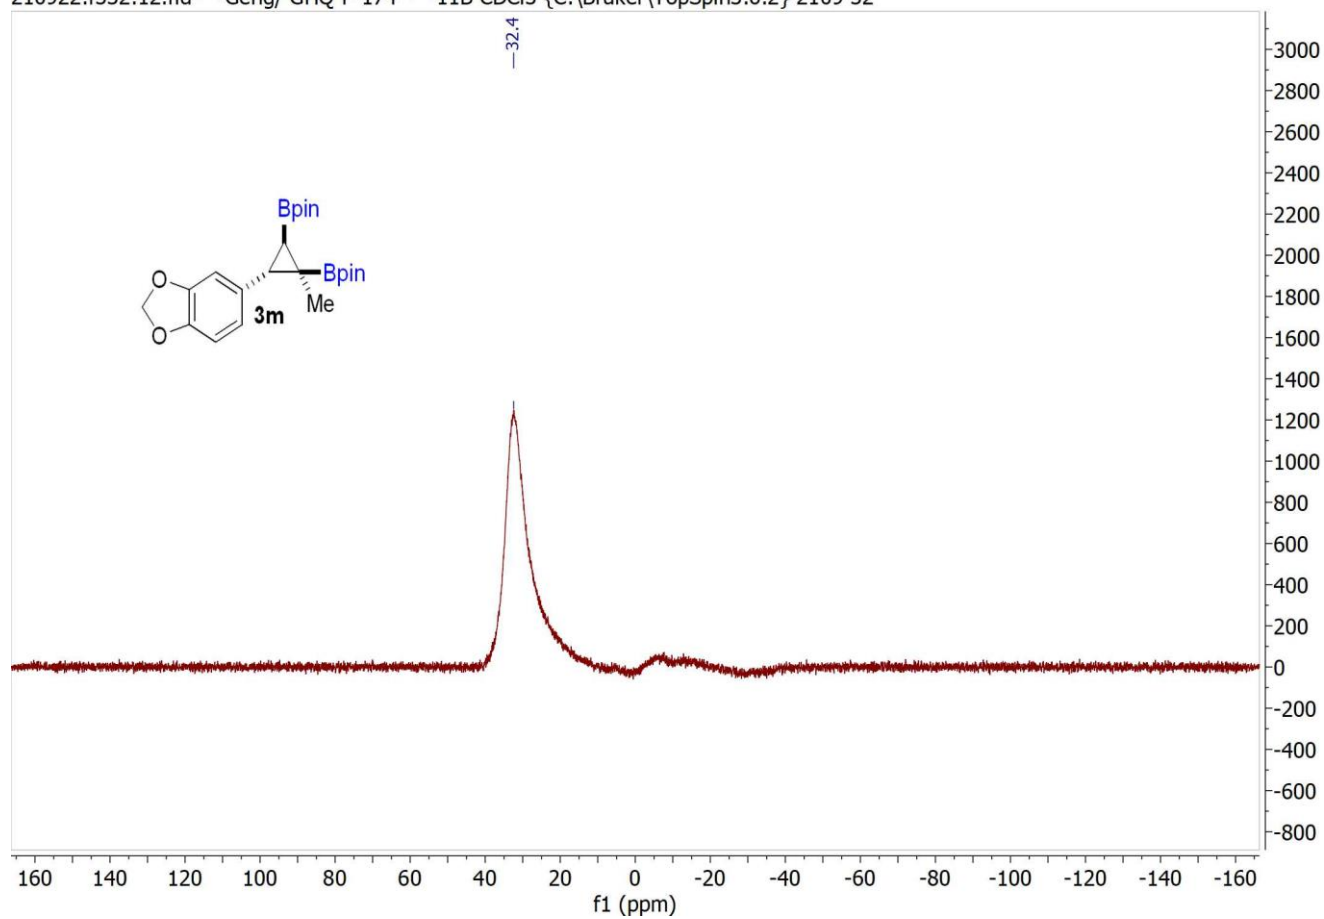

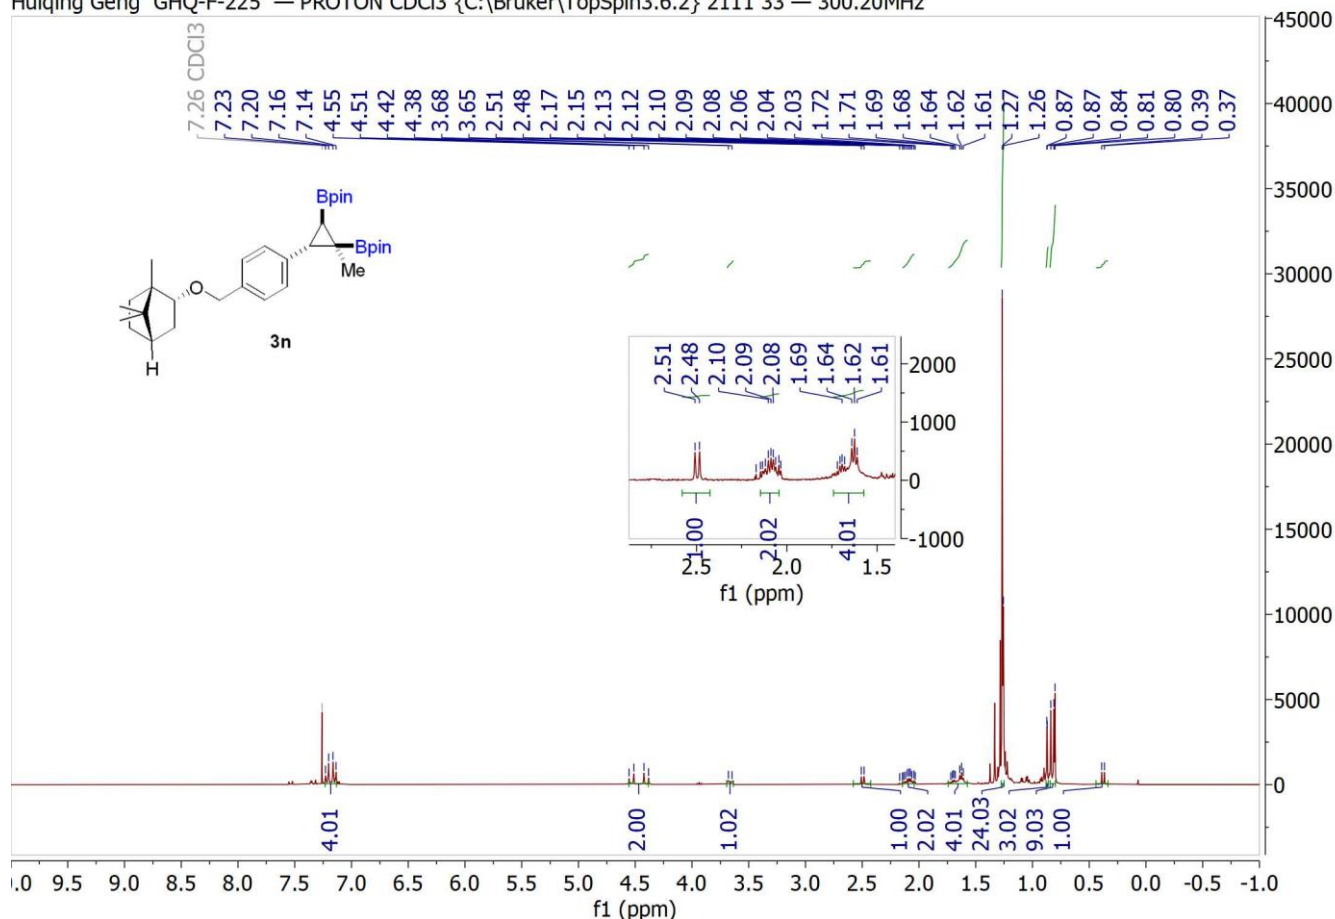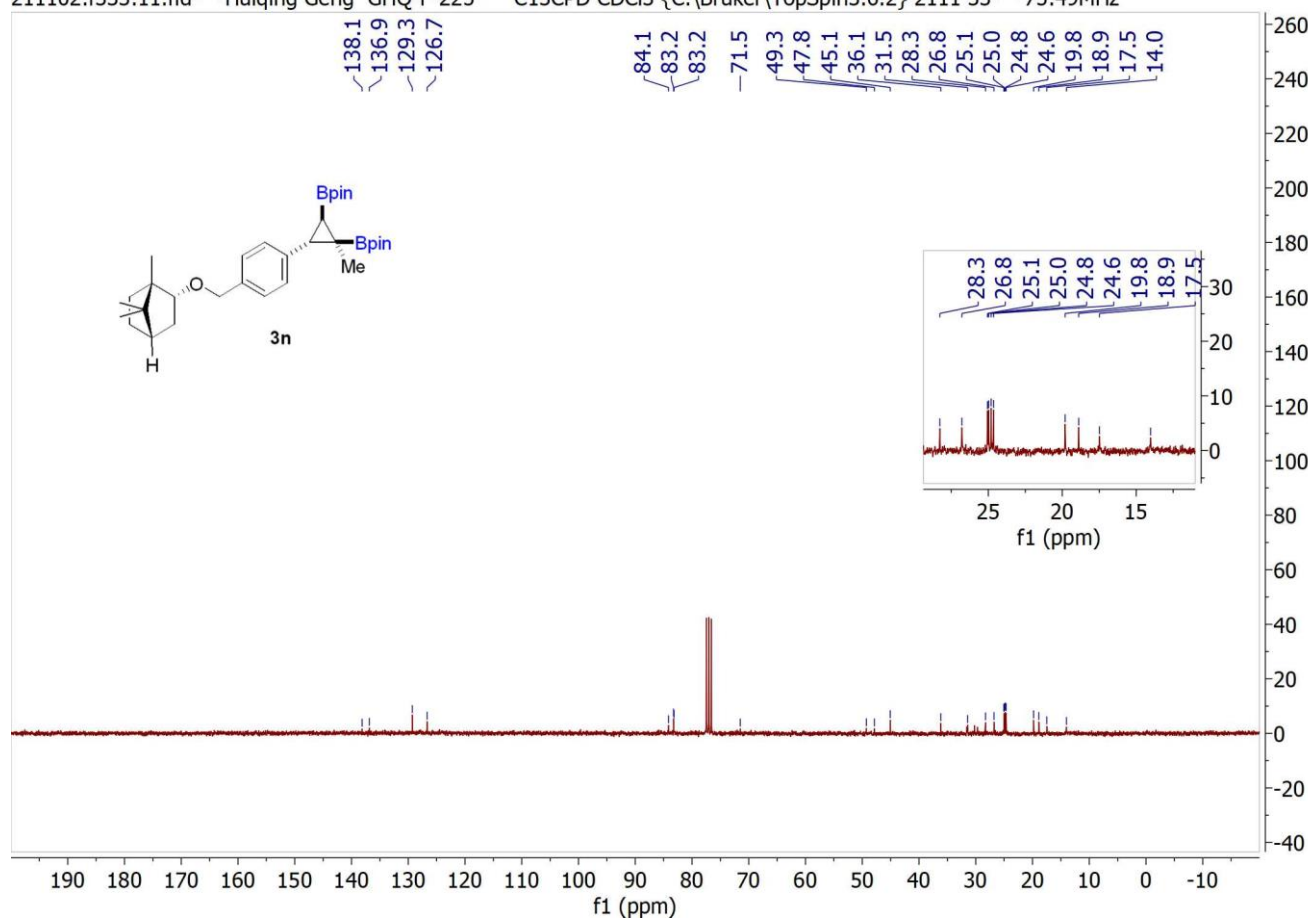

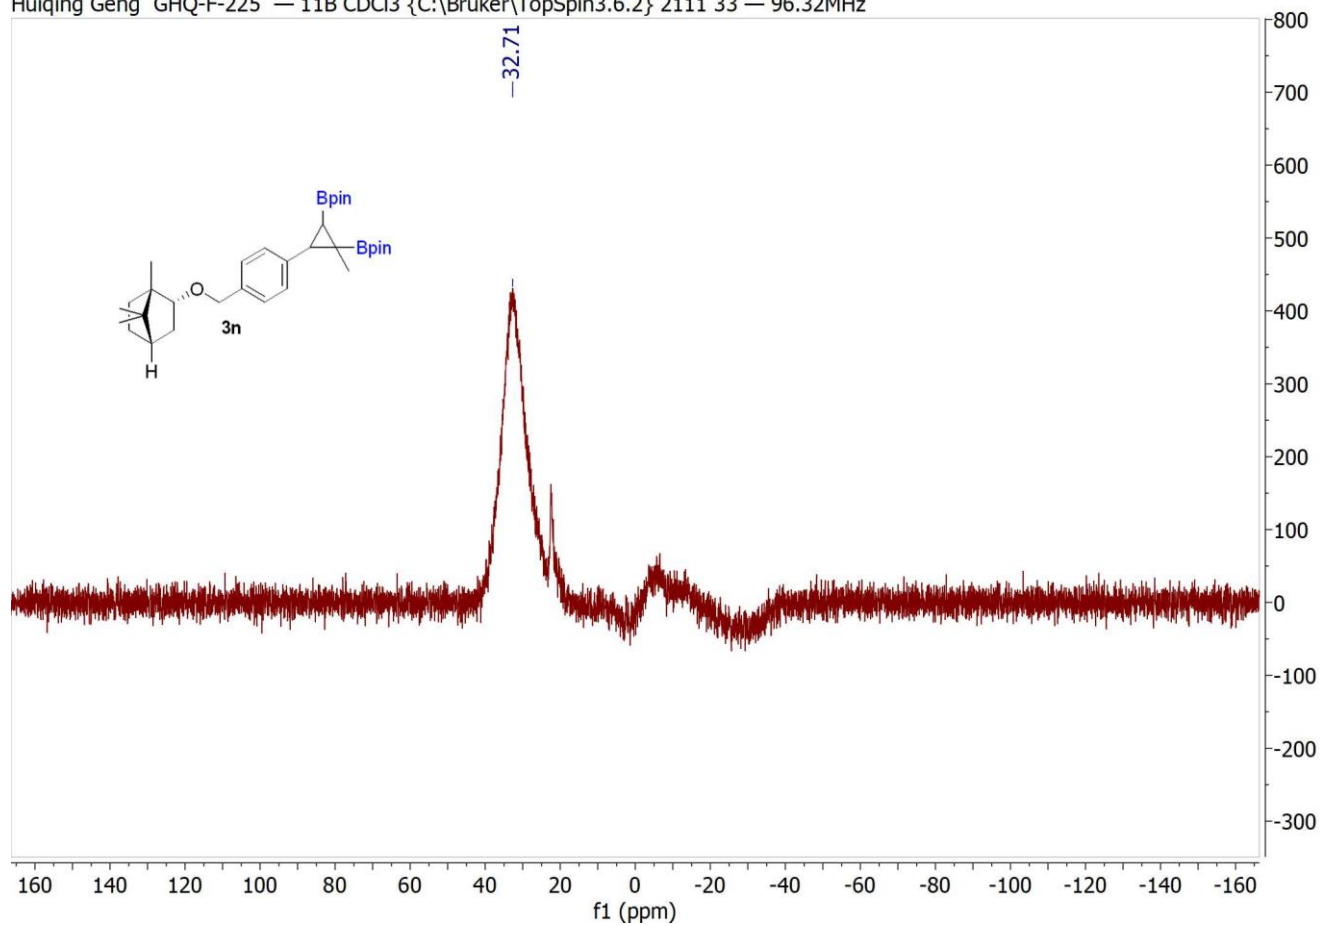

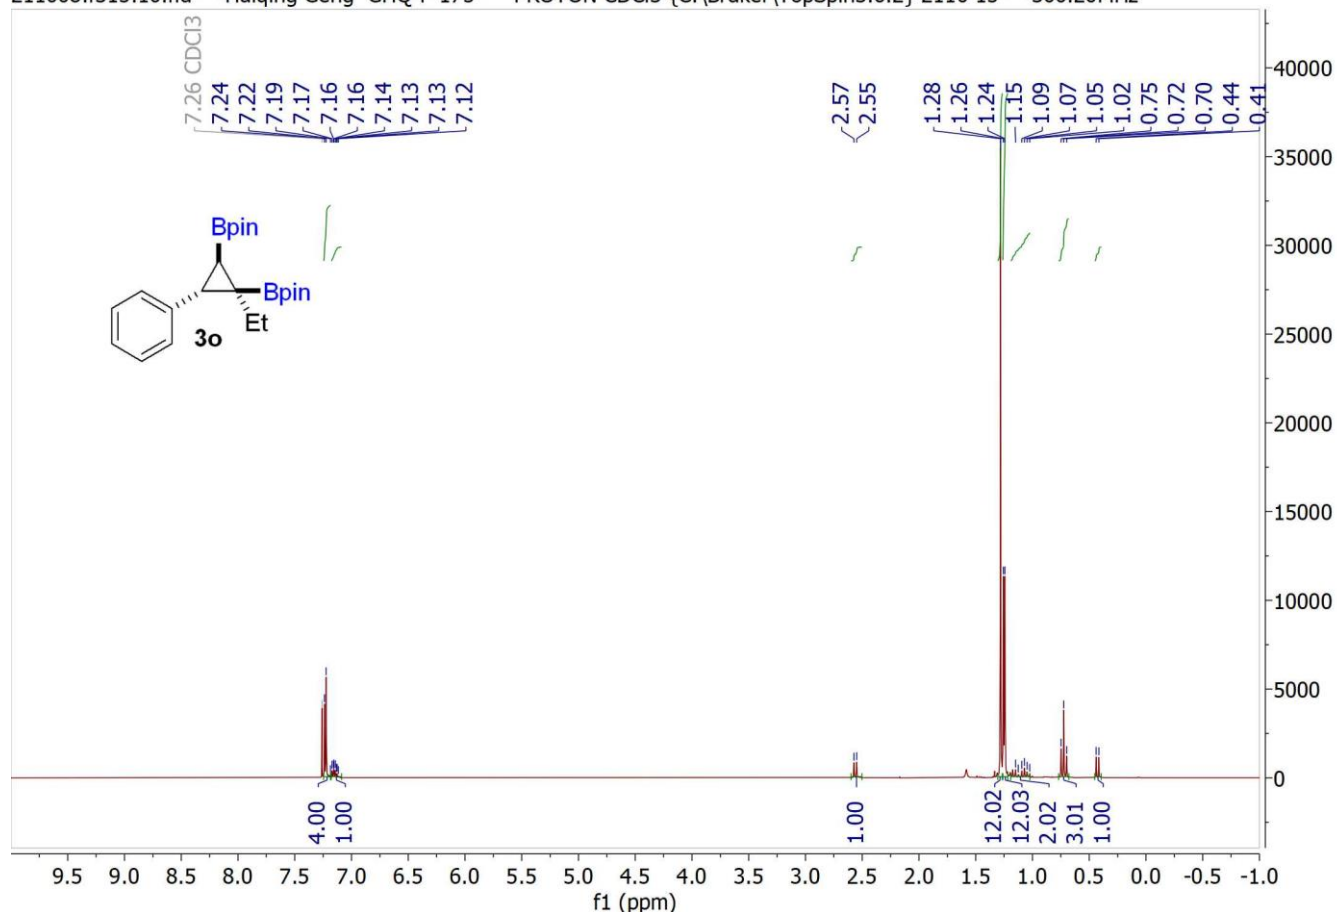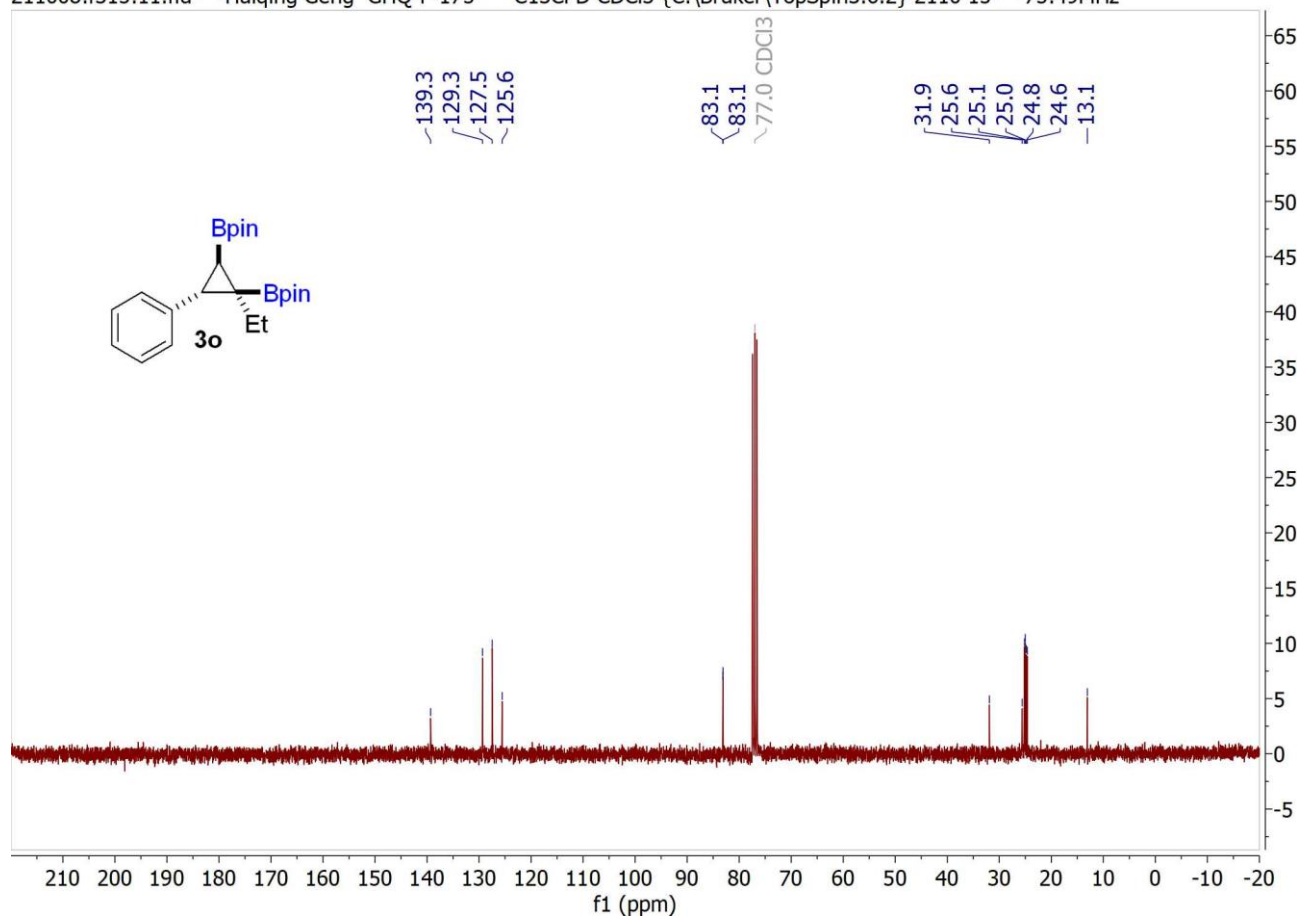



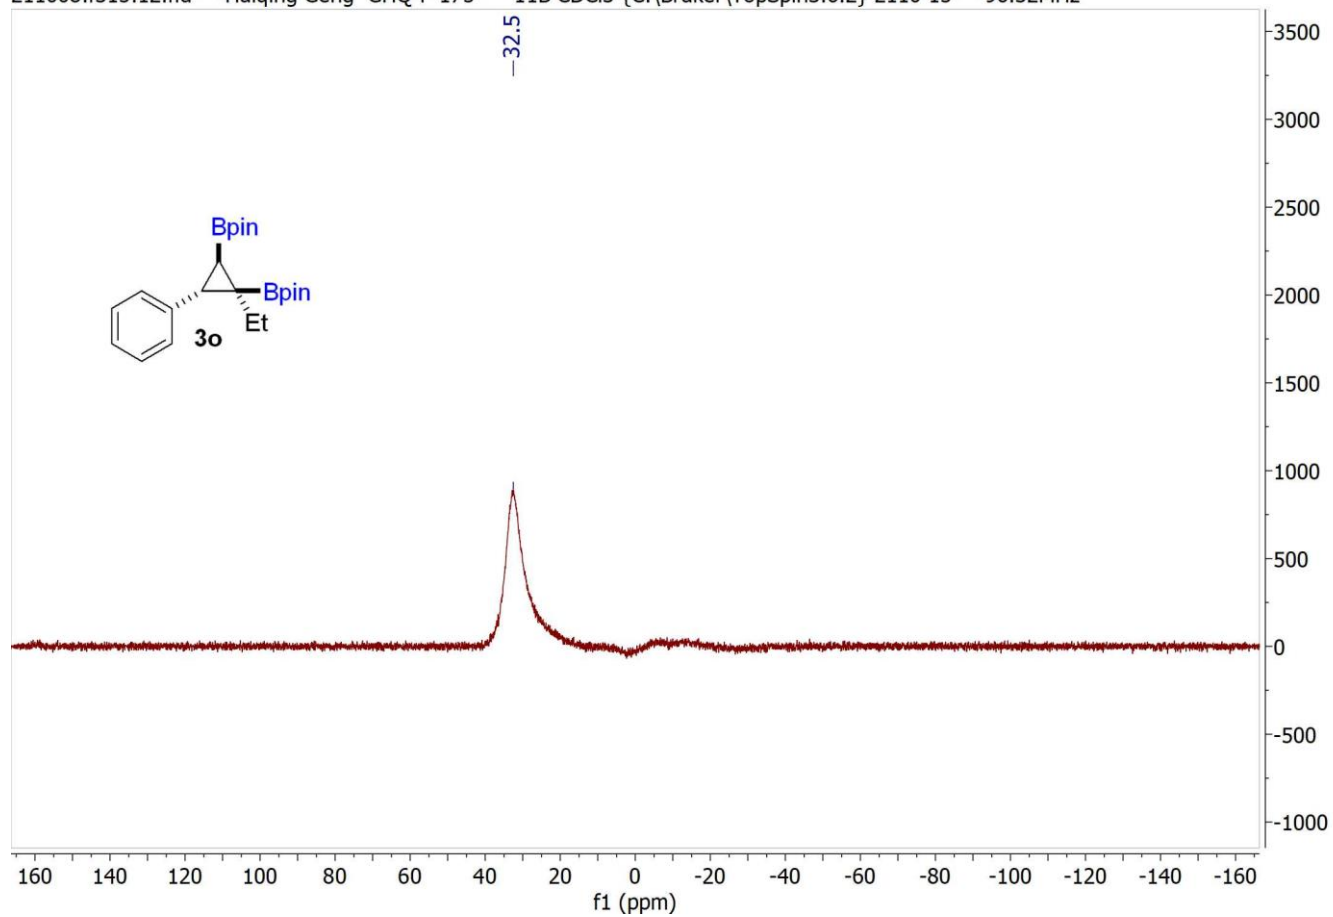

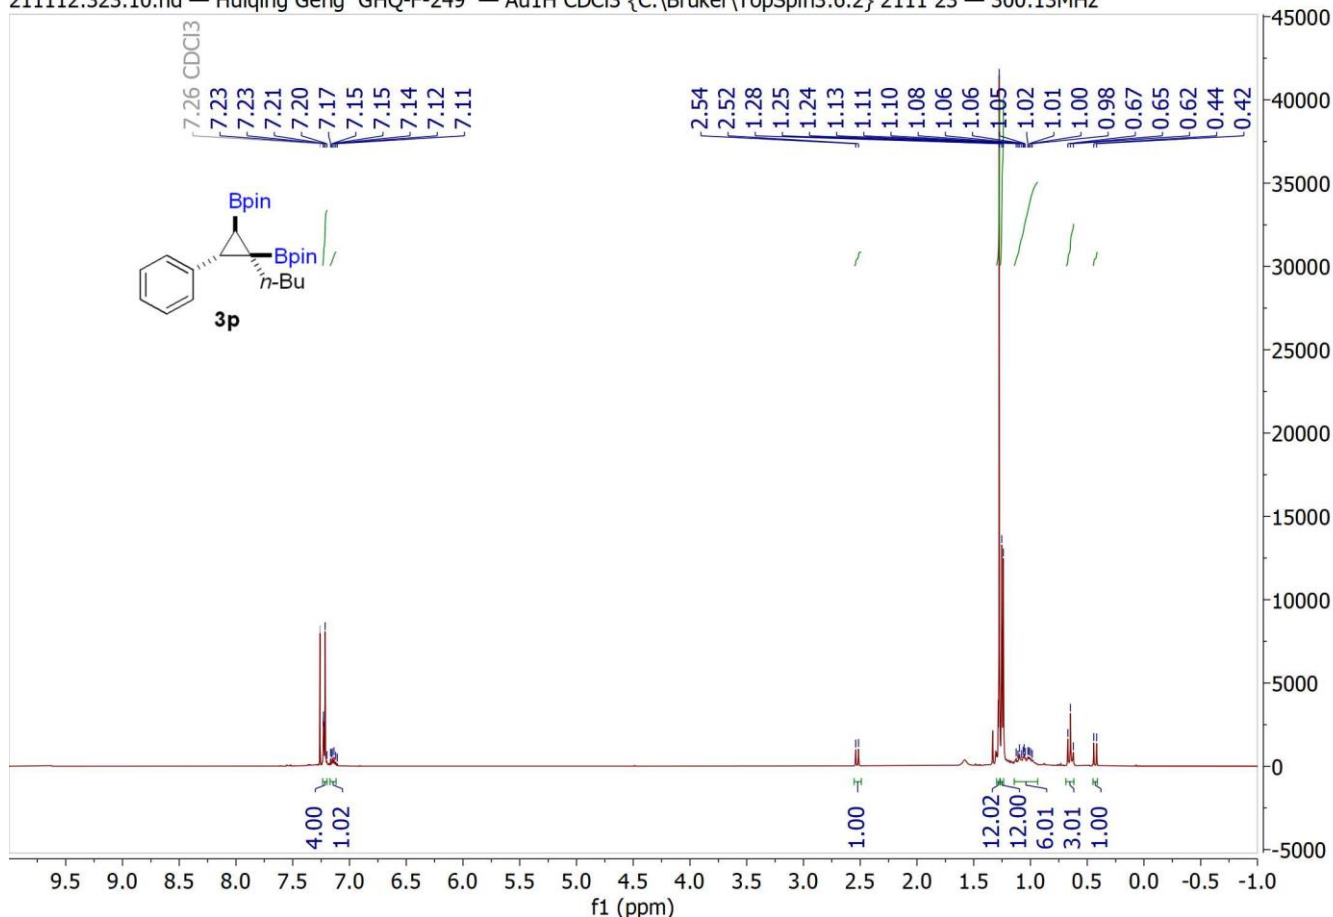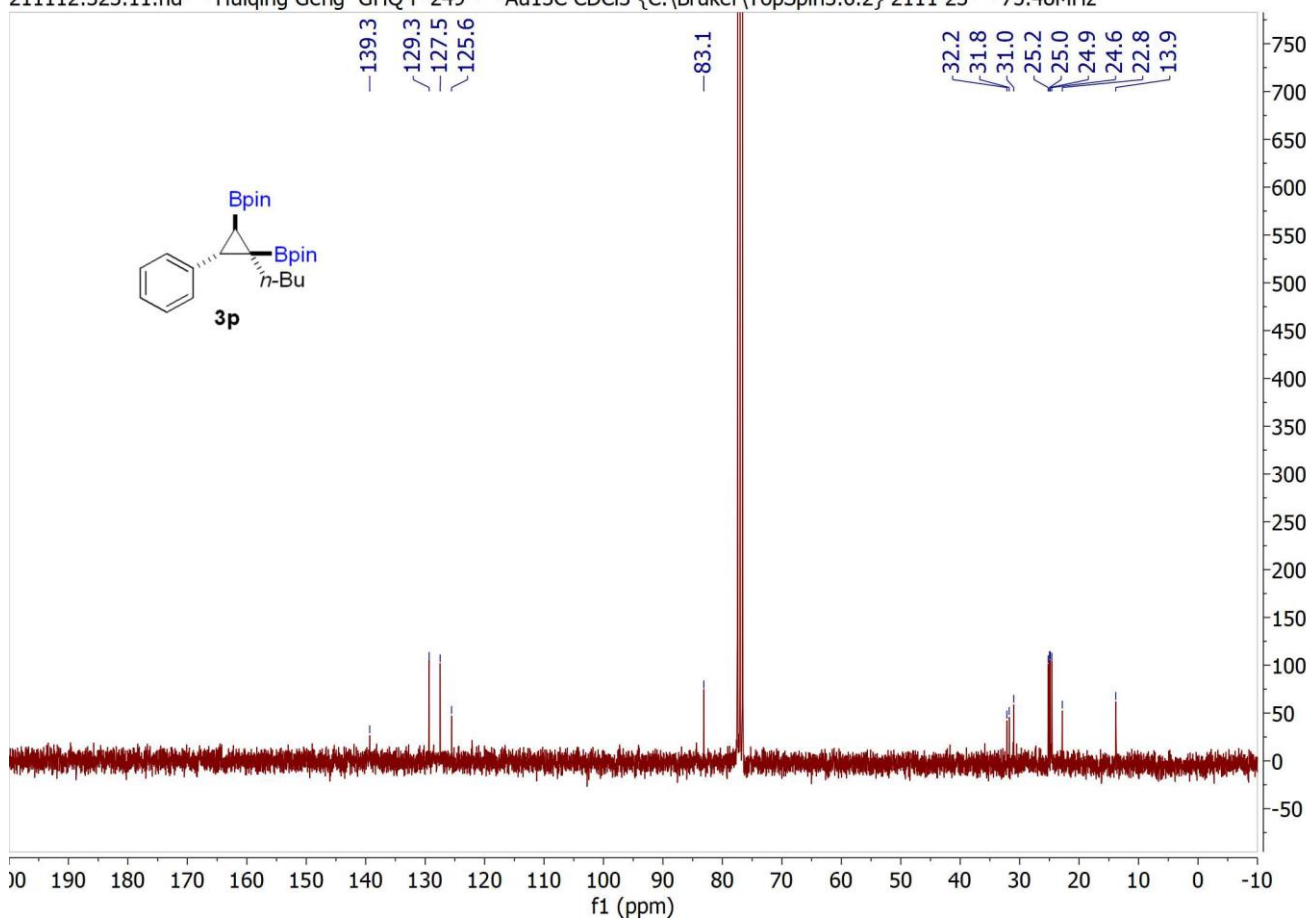

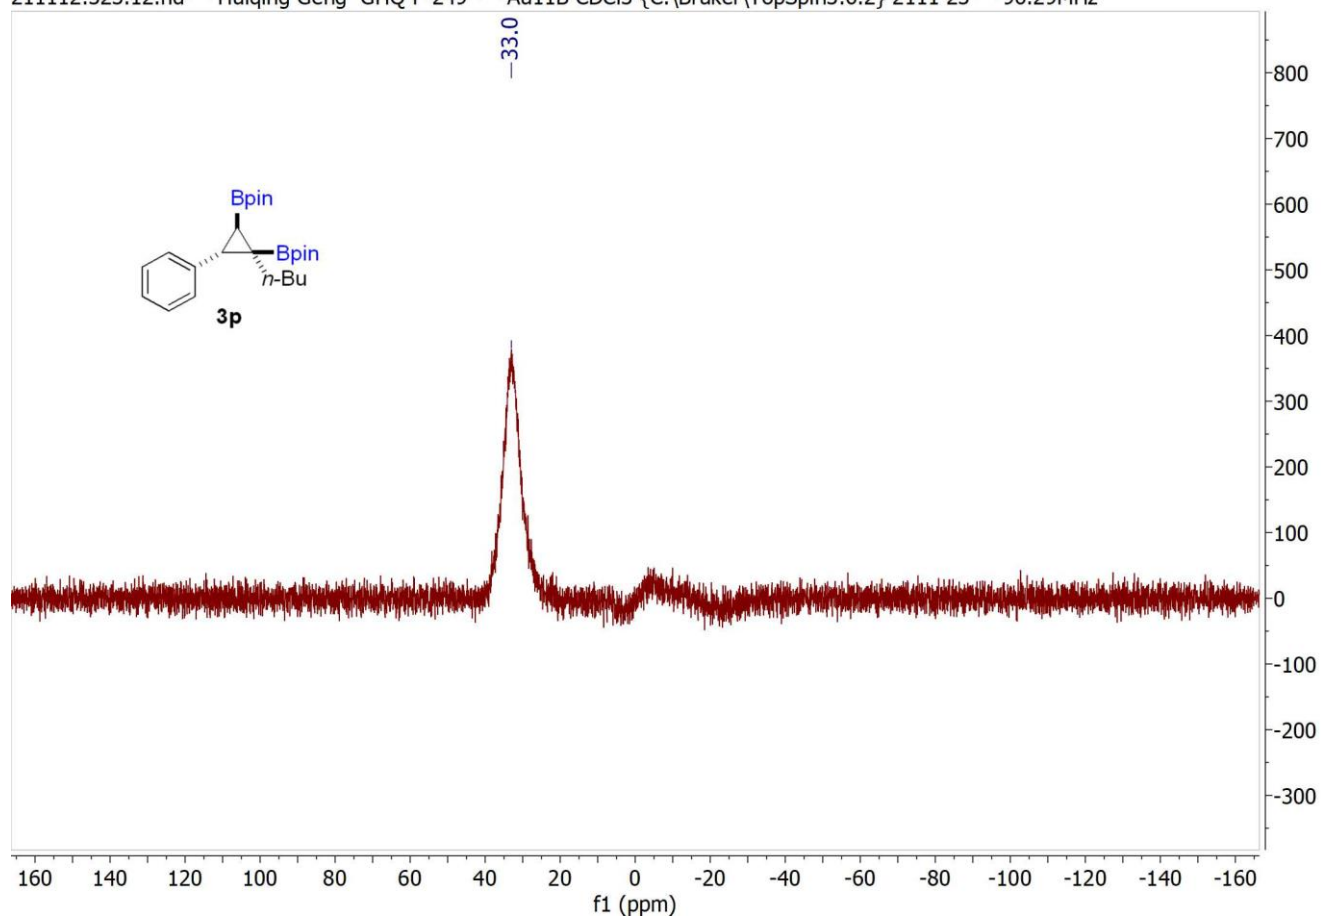

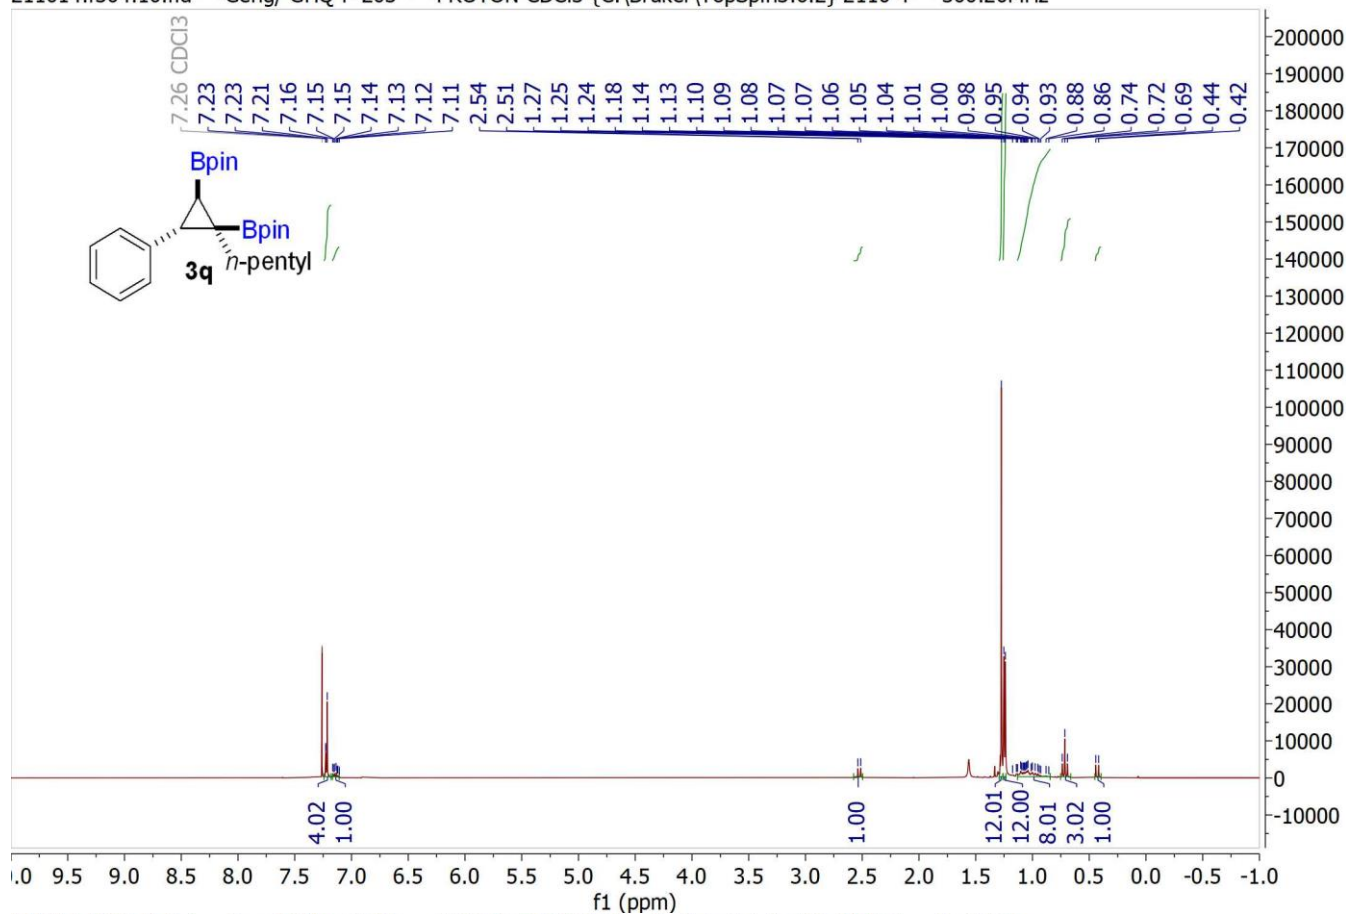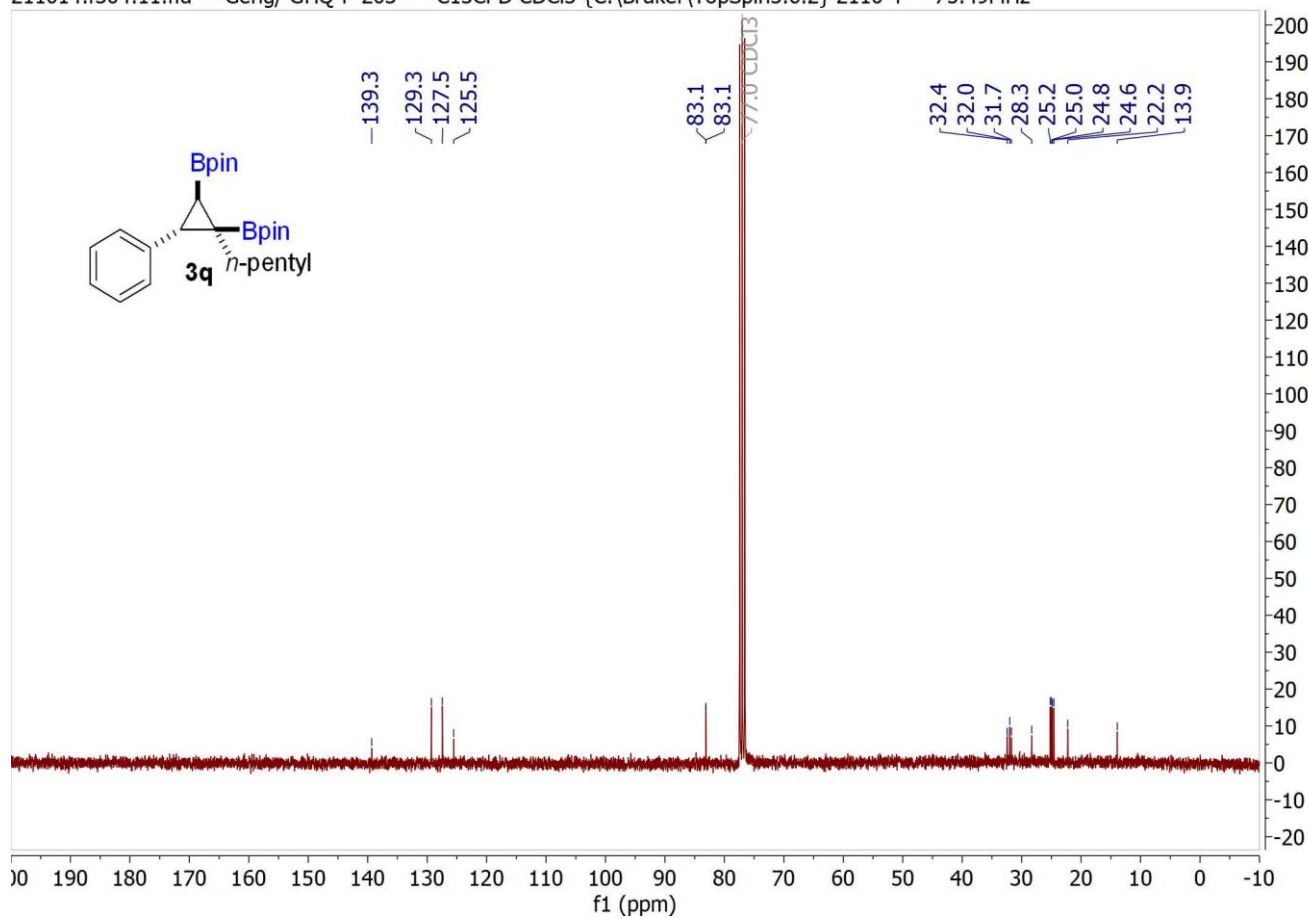

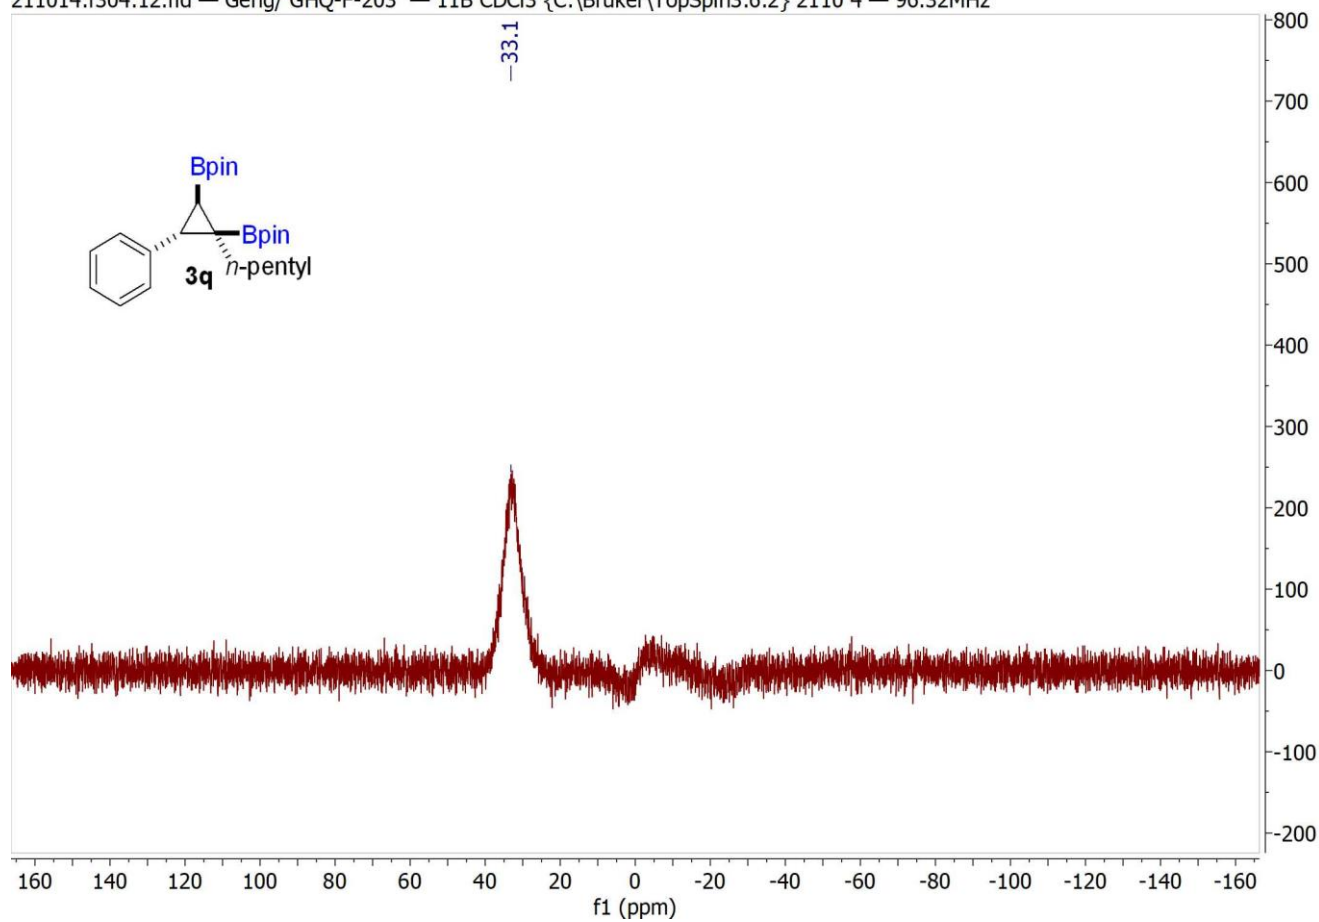

211111.313.10.fid — Huiqing Geng GHQ-G-220 — Au1H CDCl3 {C:\Bruker\TopSpin3.6.2} 2111 13 — 300.13MHz

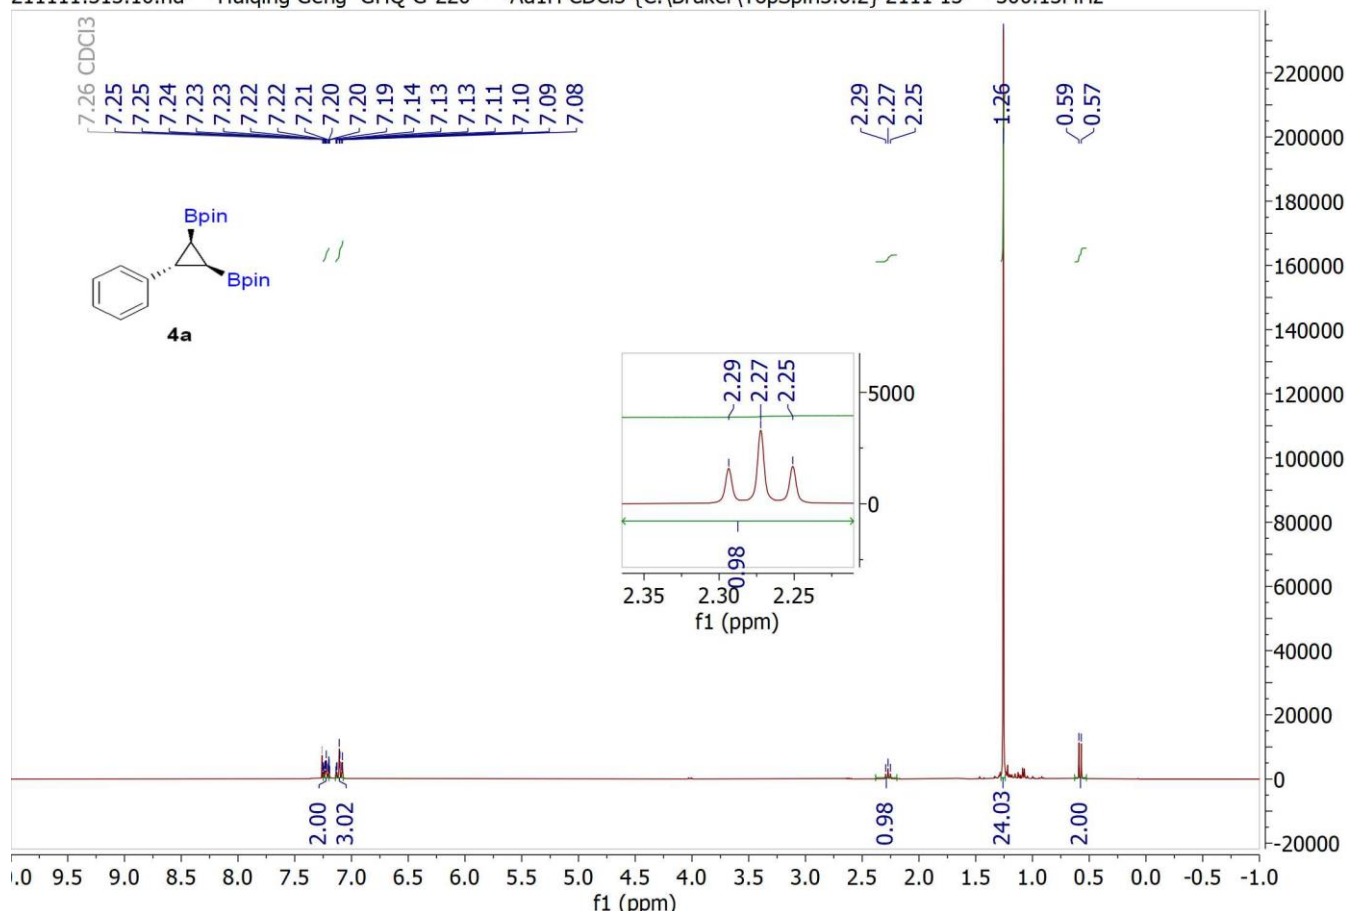

211111.313.11.fid — Huiqing Geng GHQ-G-220 — Au13C CDCl3 {C:\Bruker\TopSpin3.6.2} 2111 13 — 75.48MHz

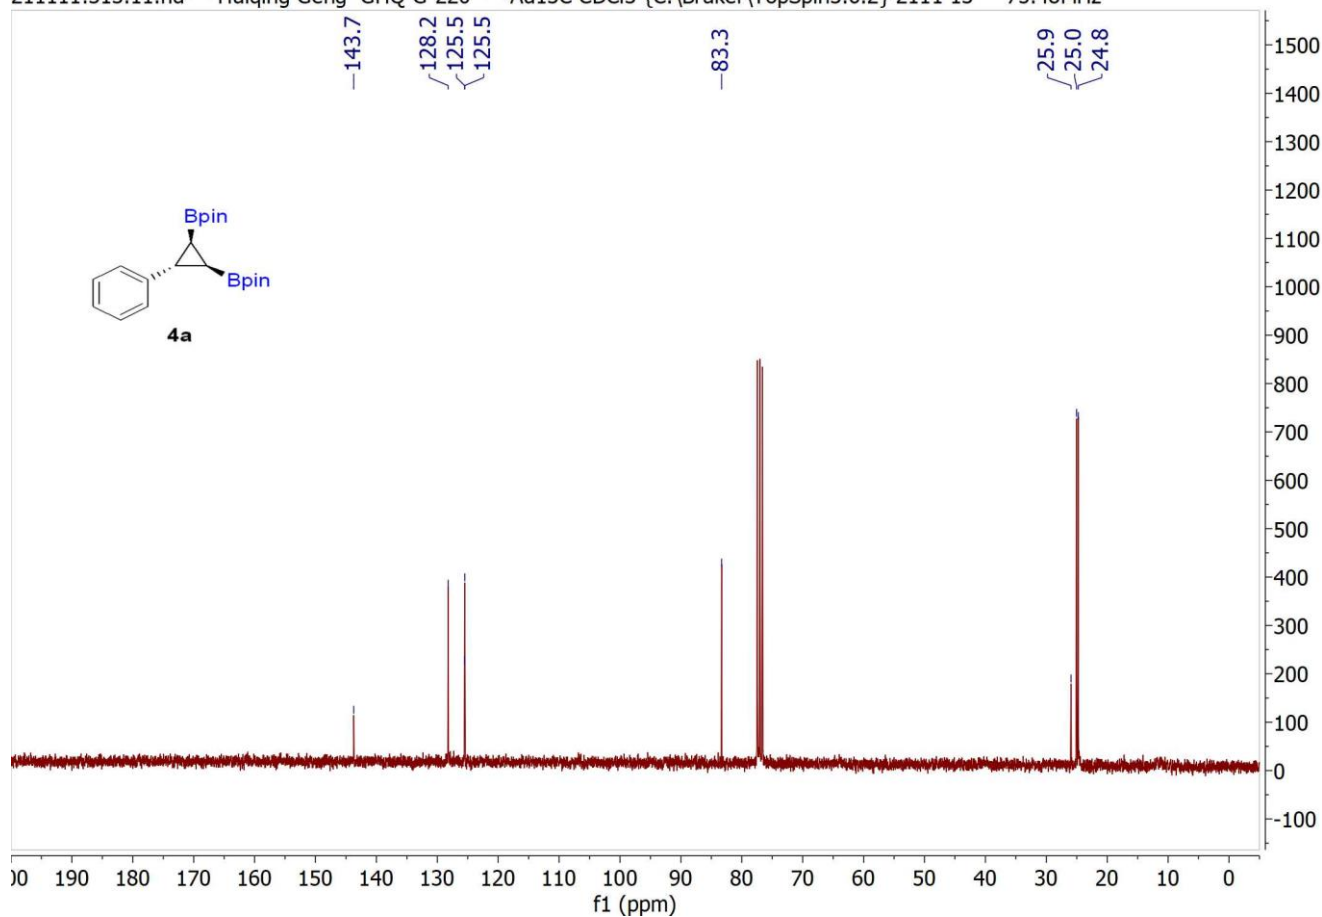

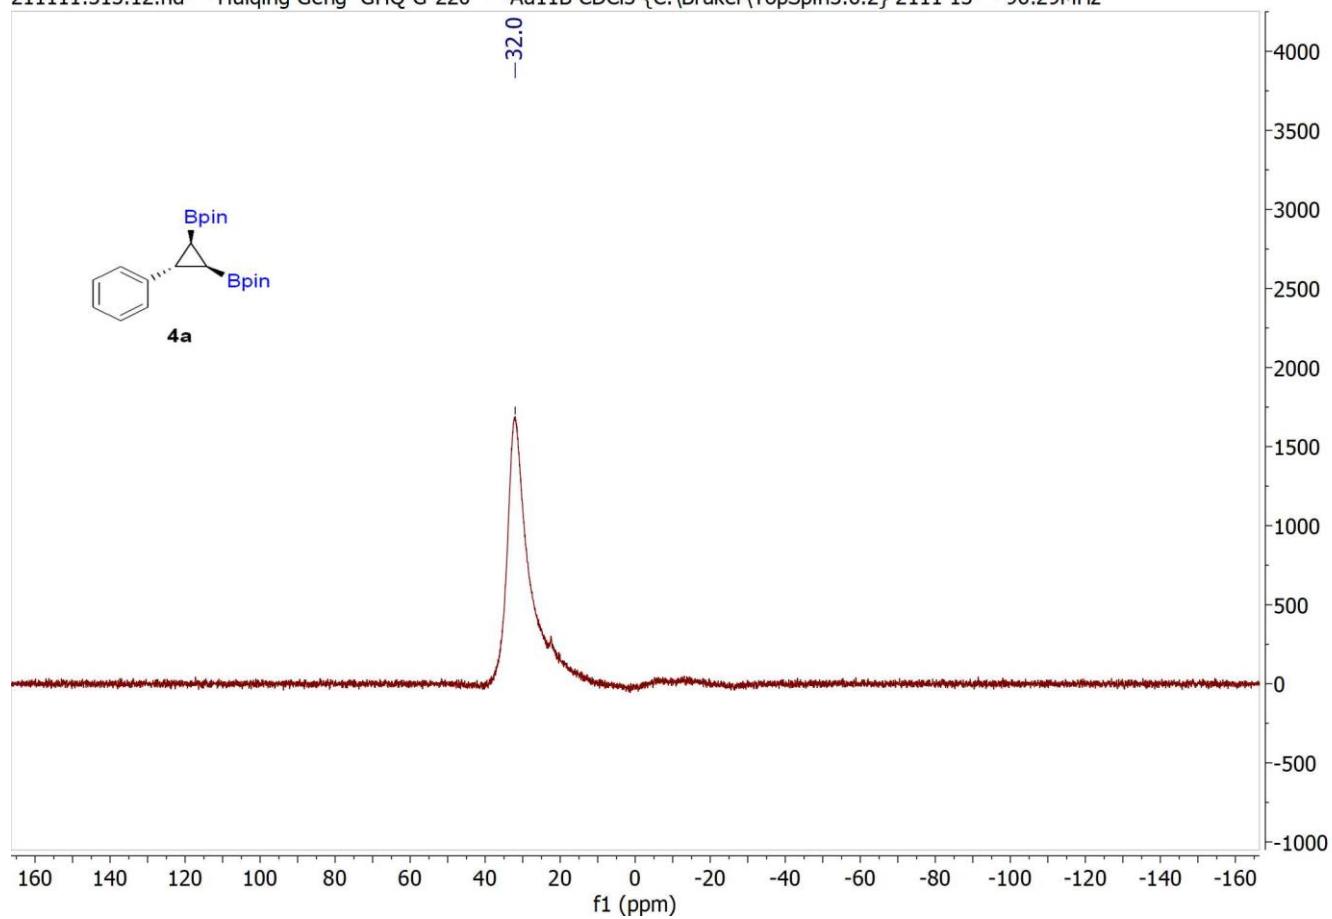

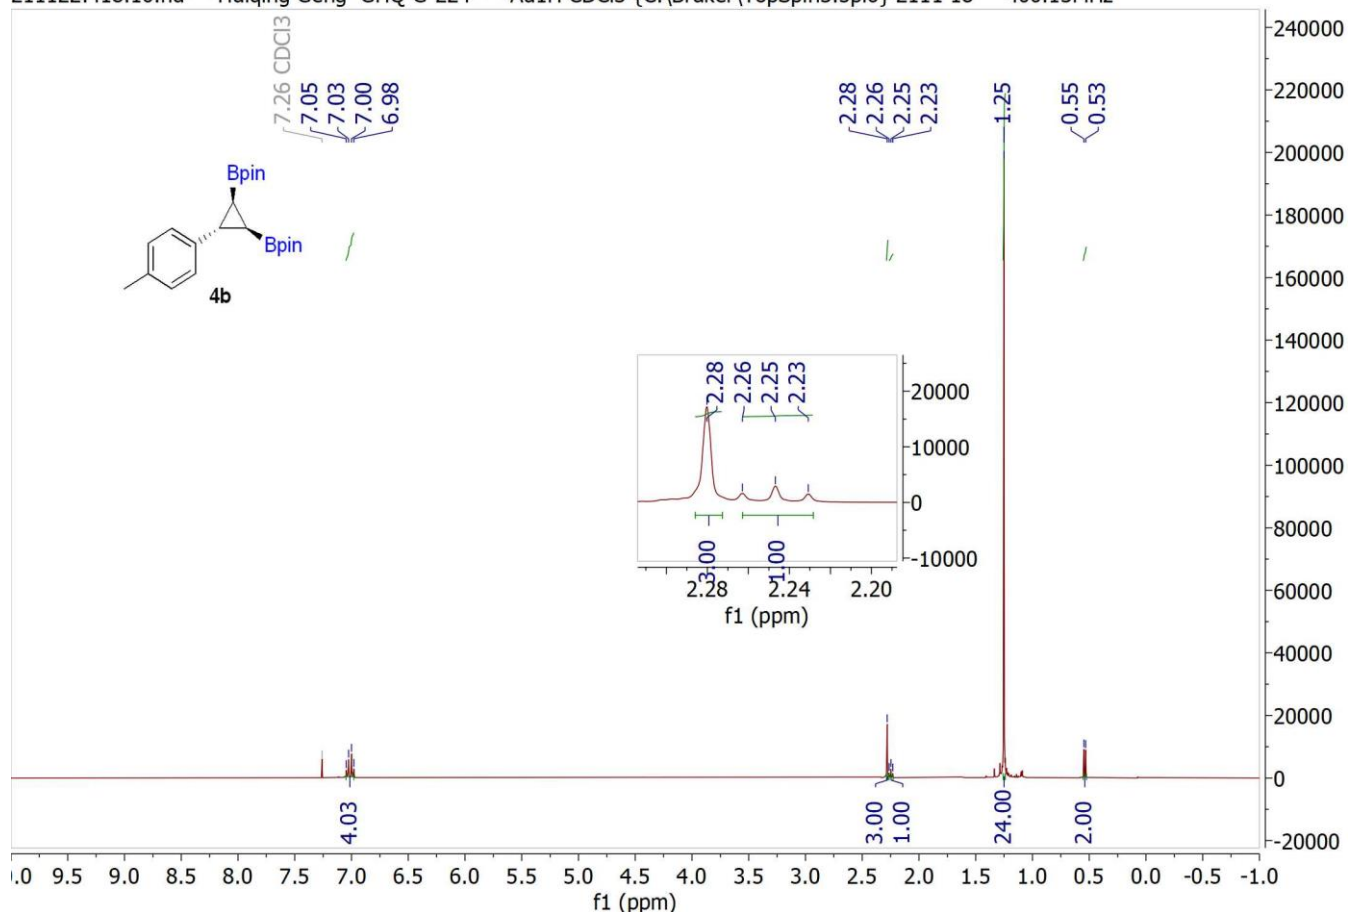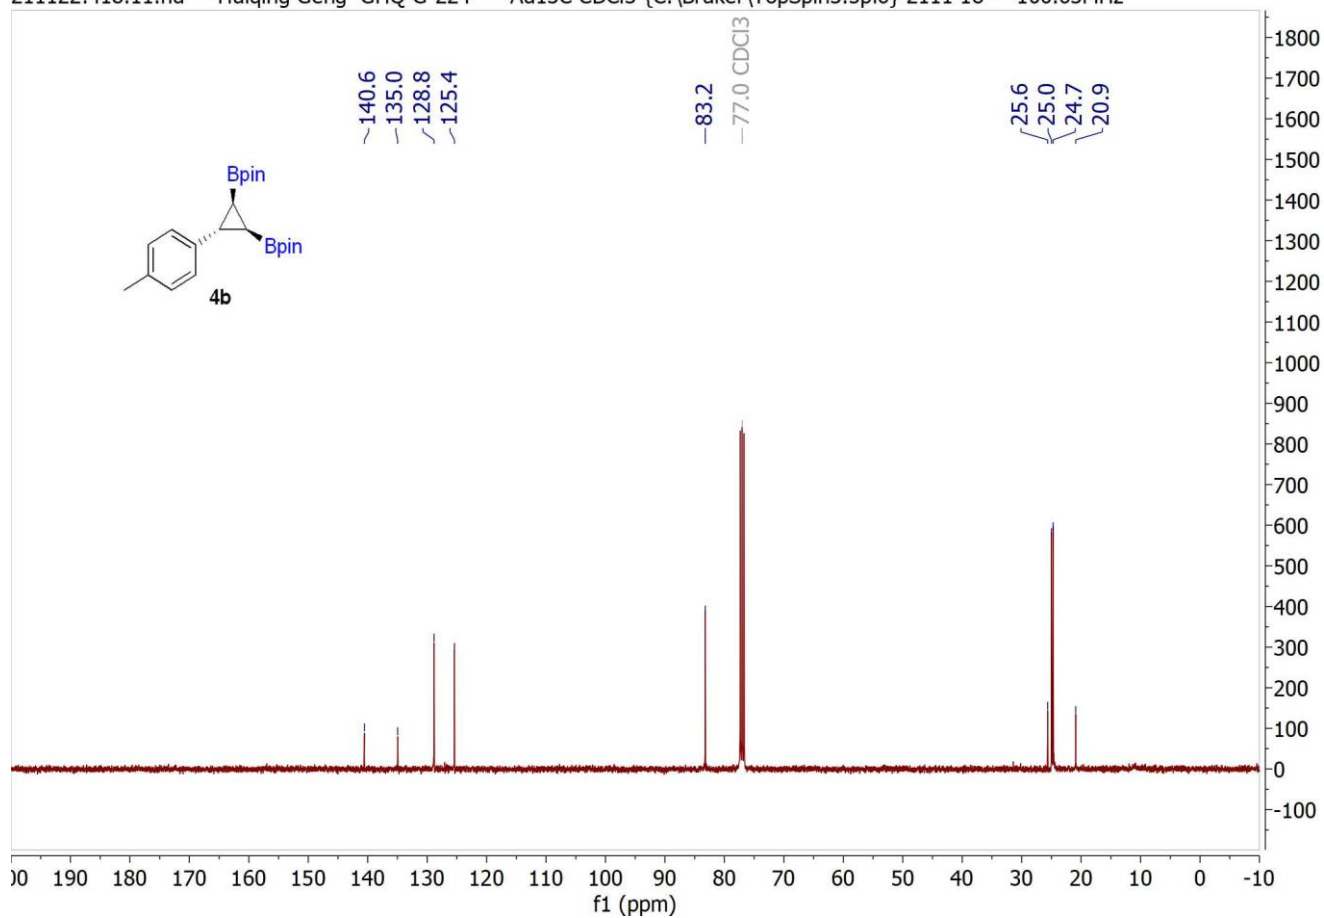



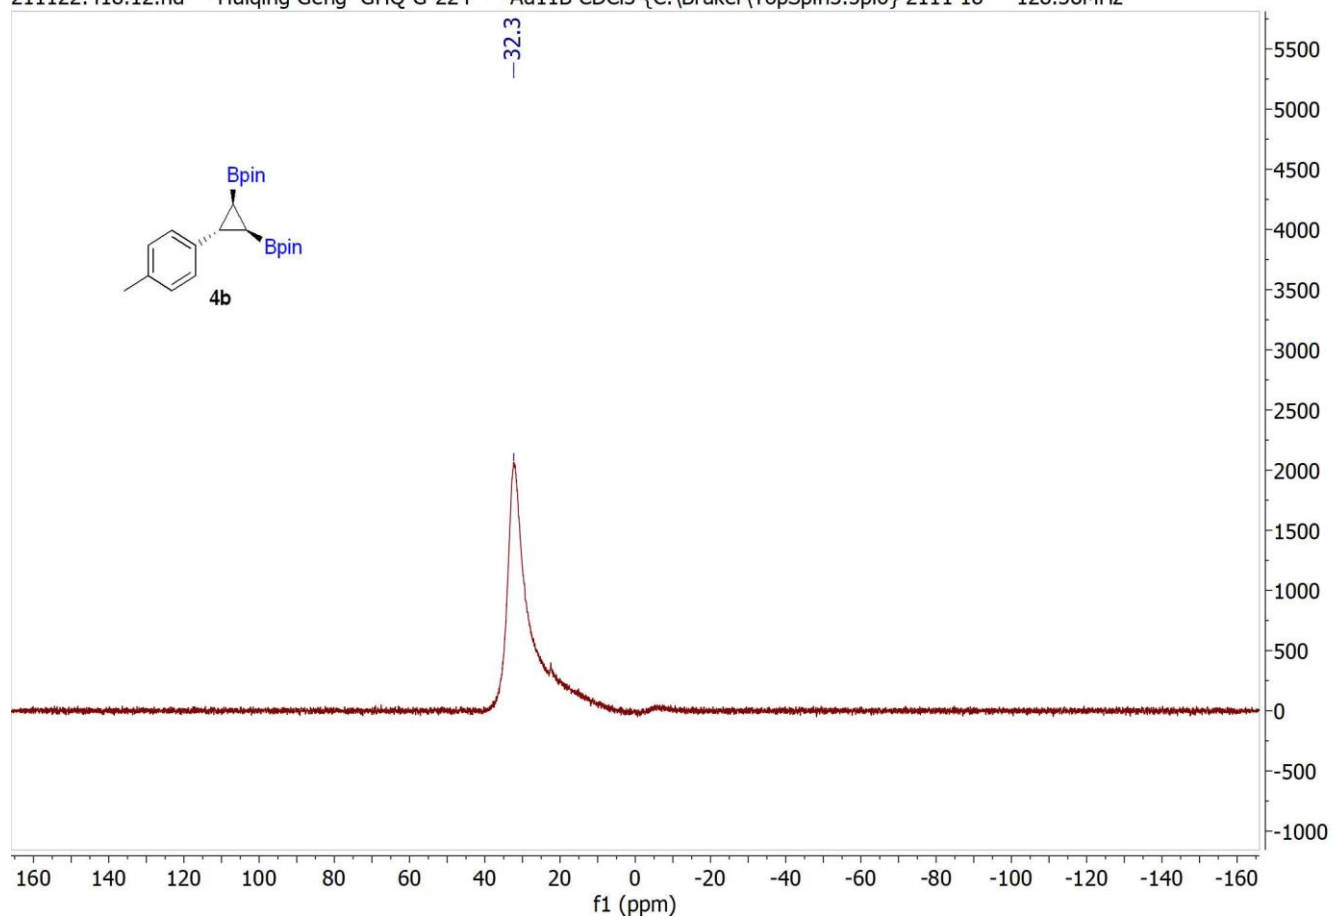

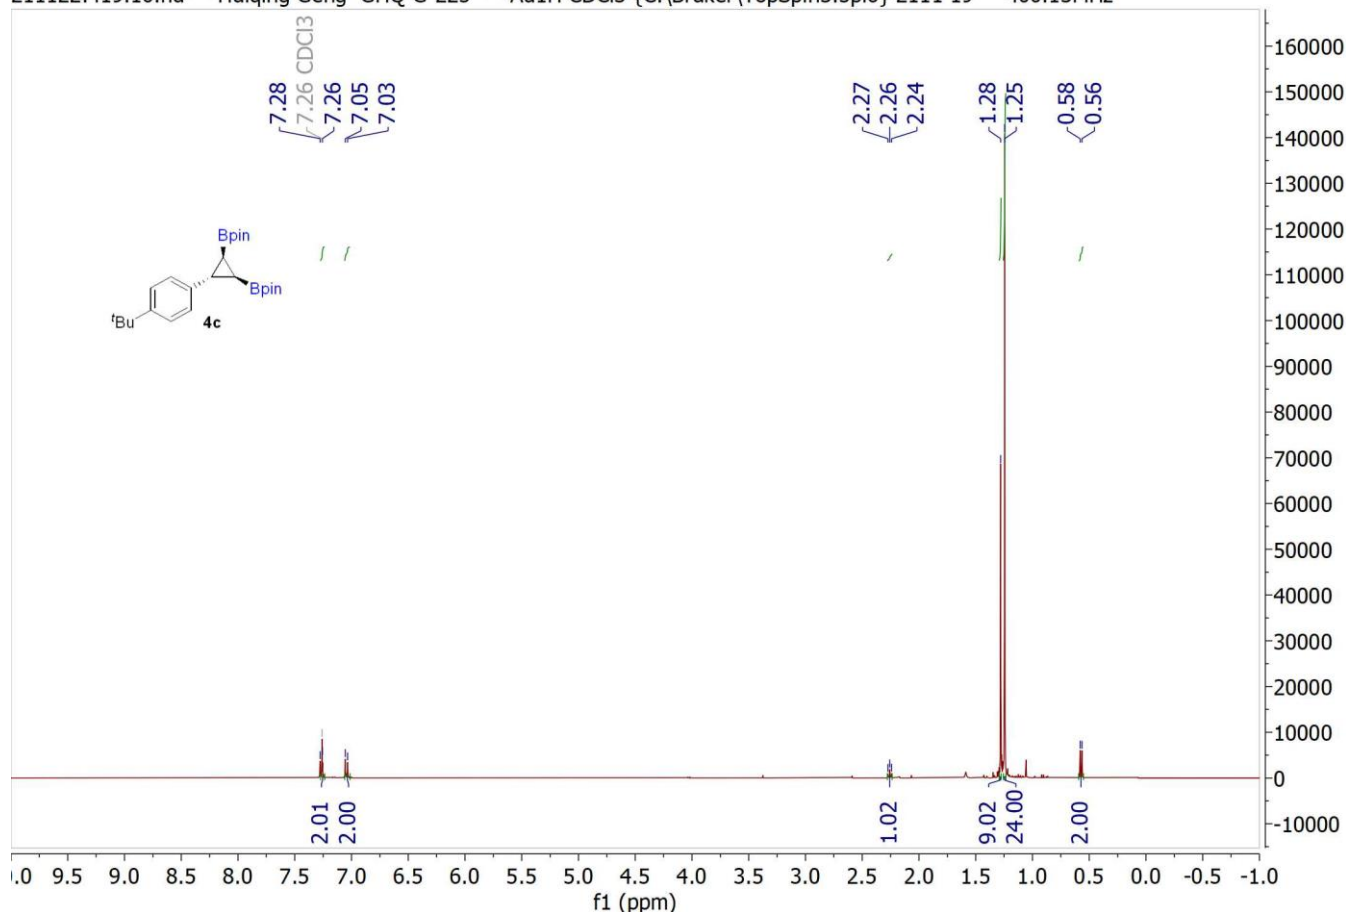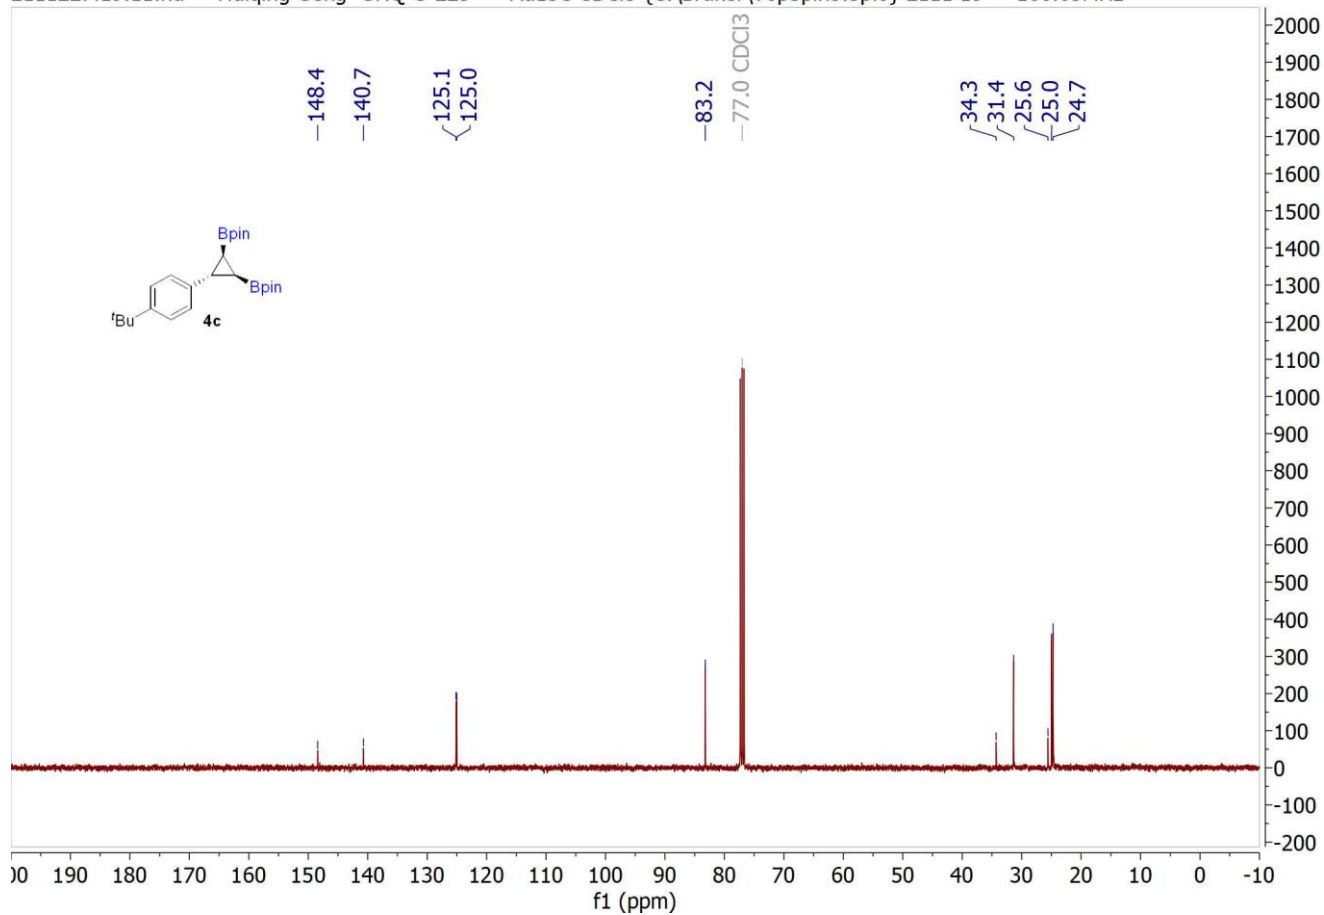

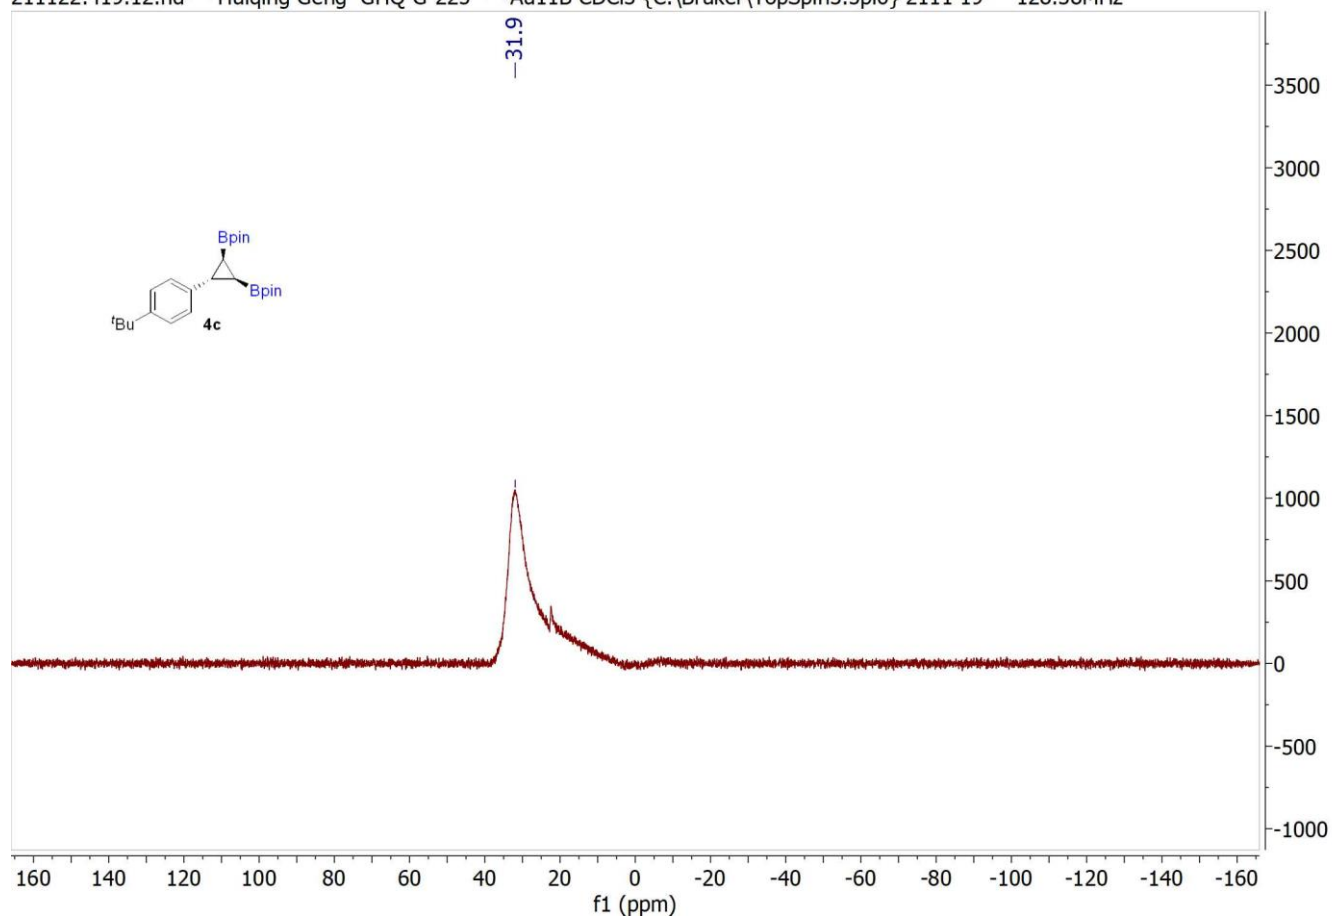

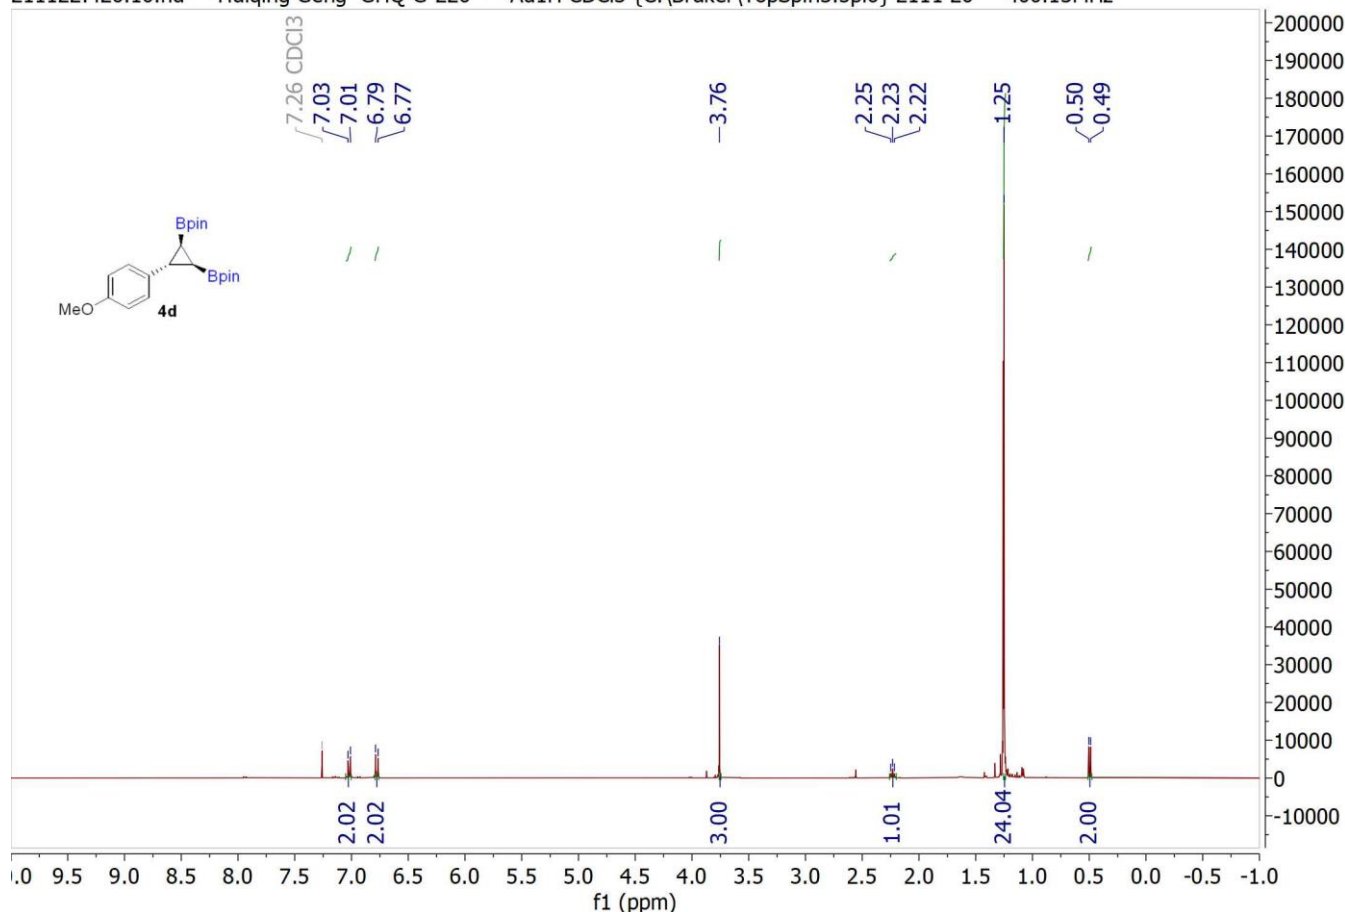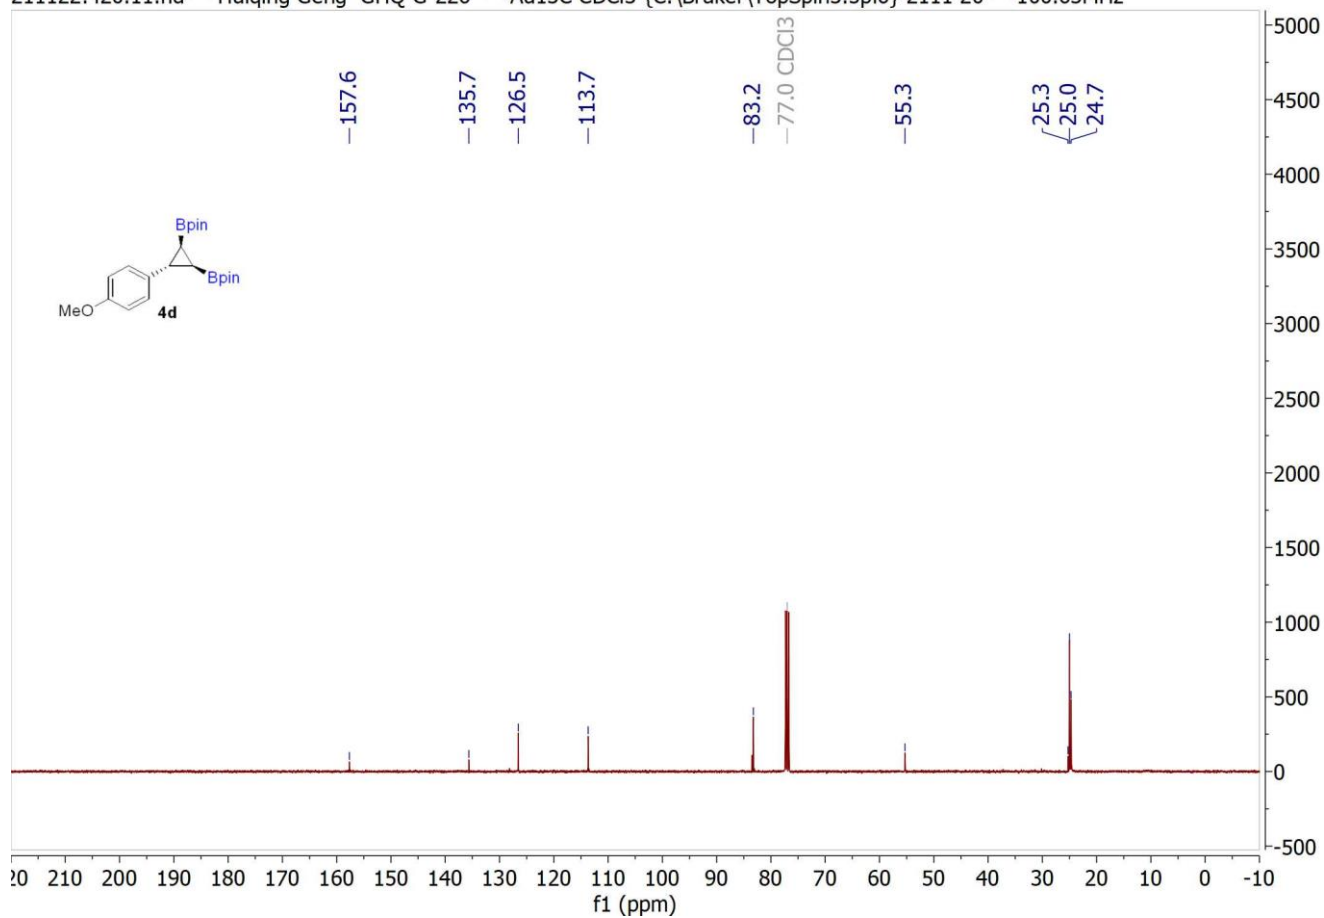

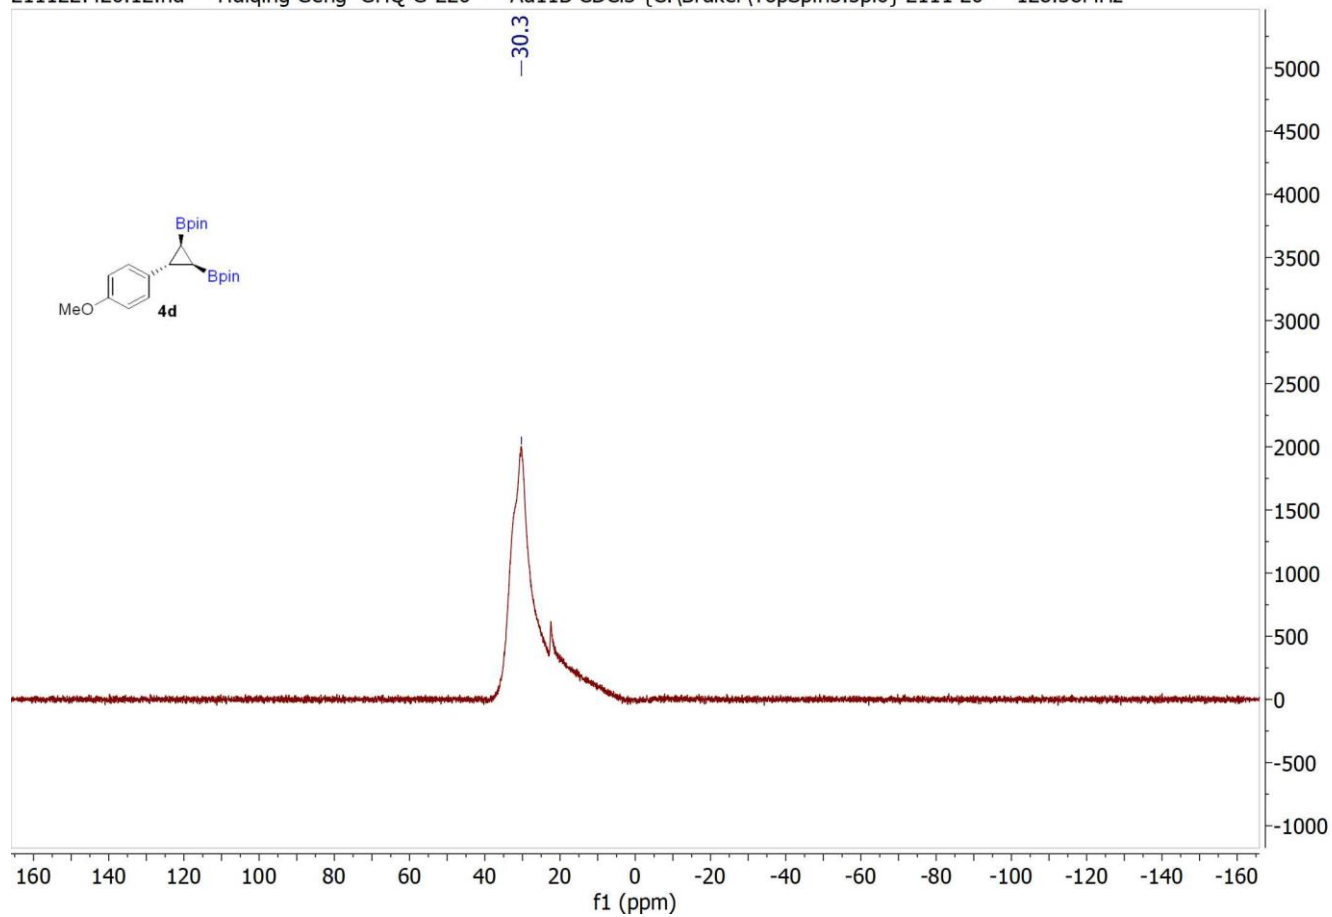

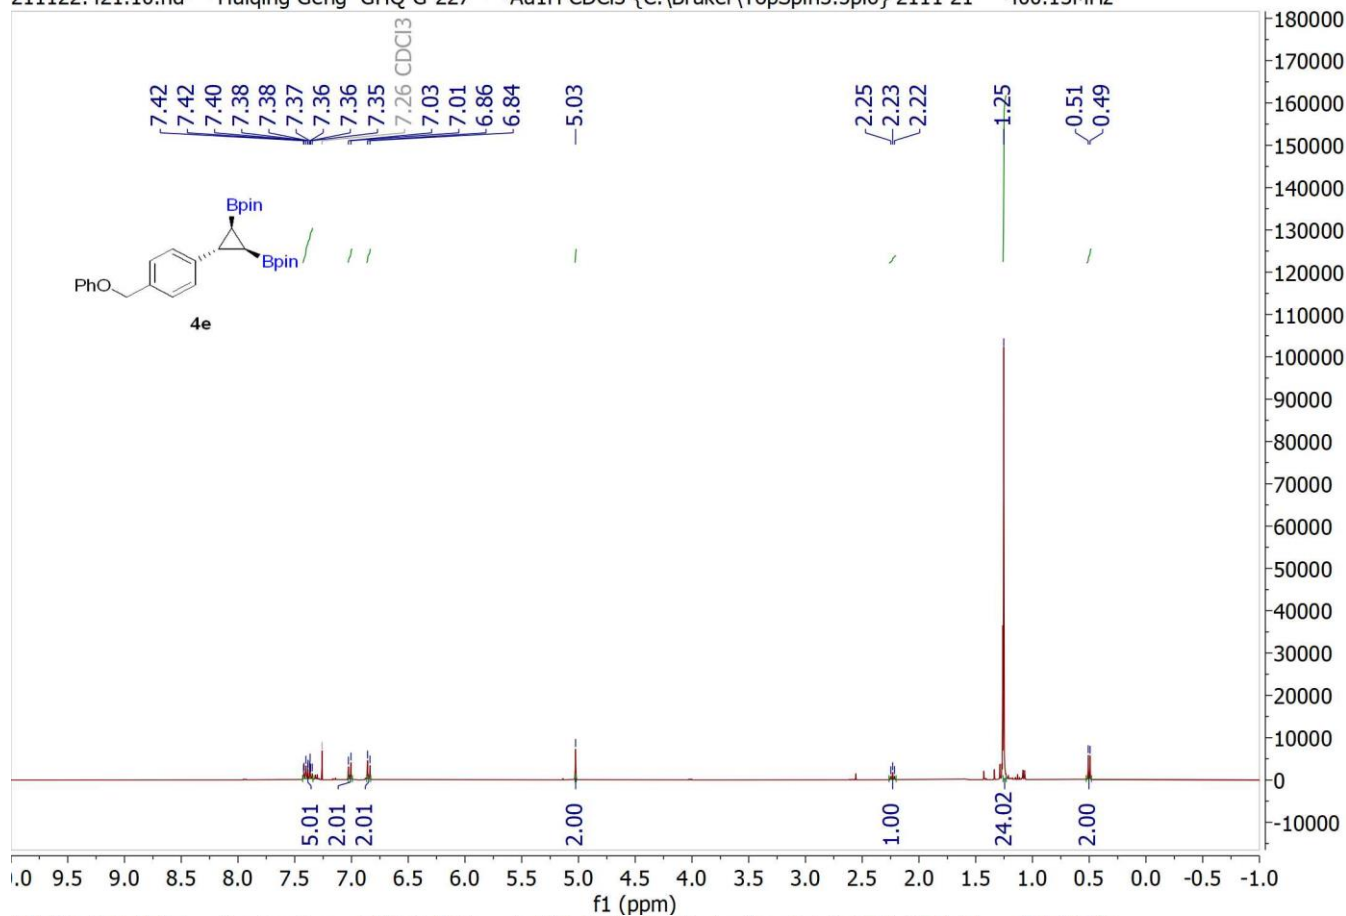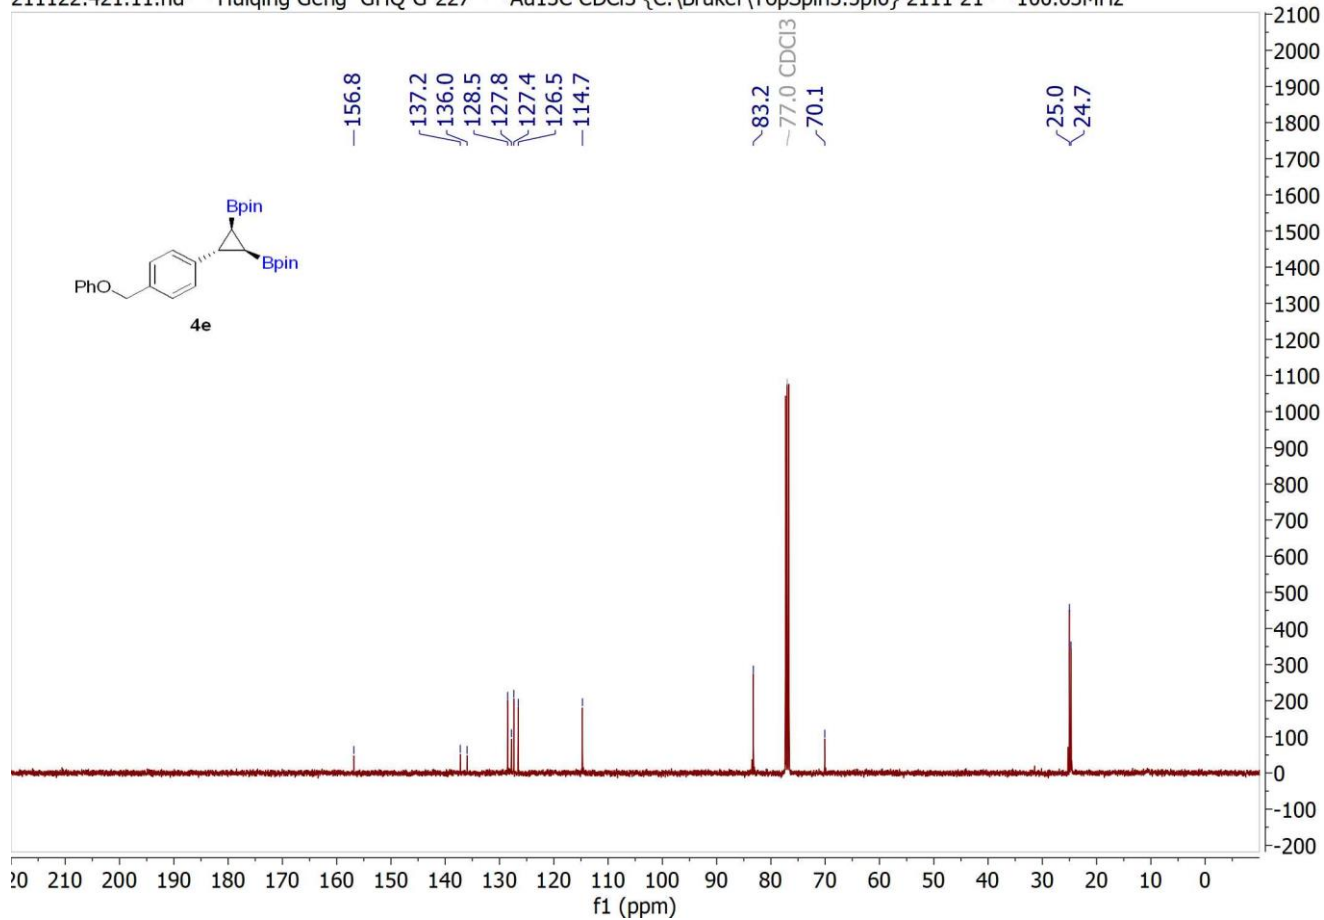

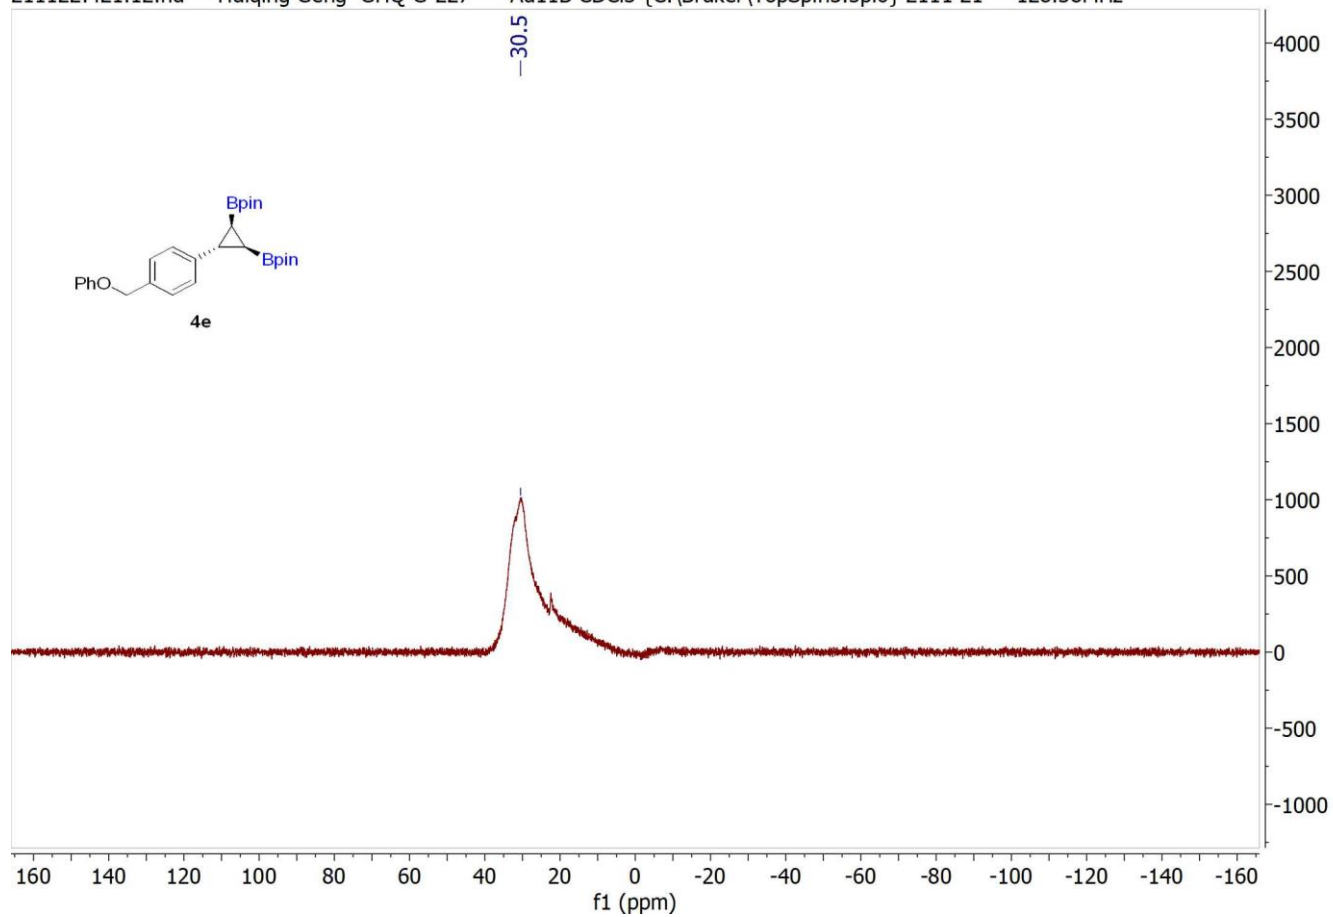

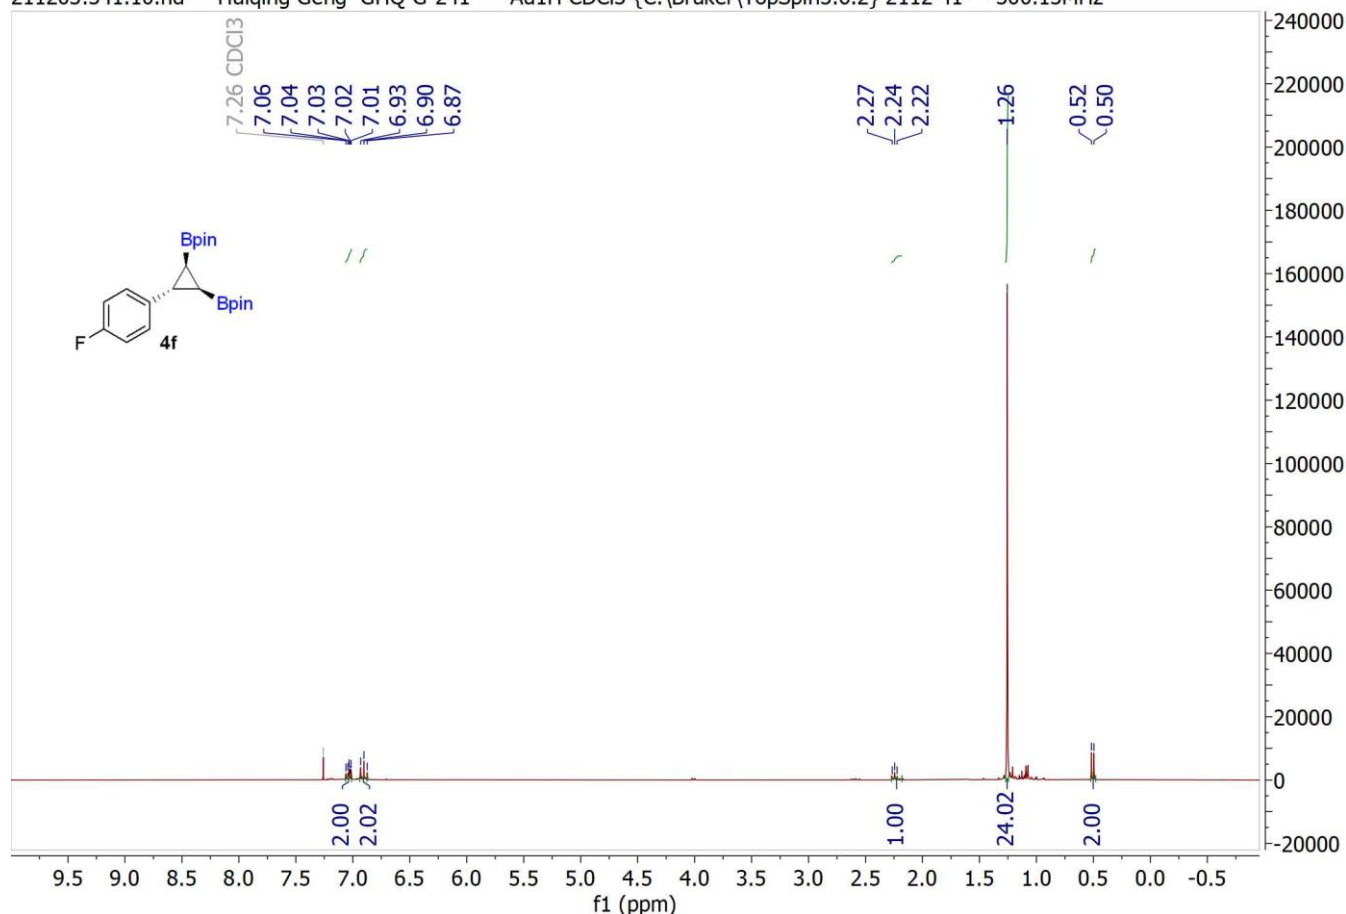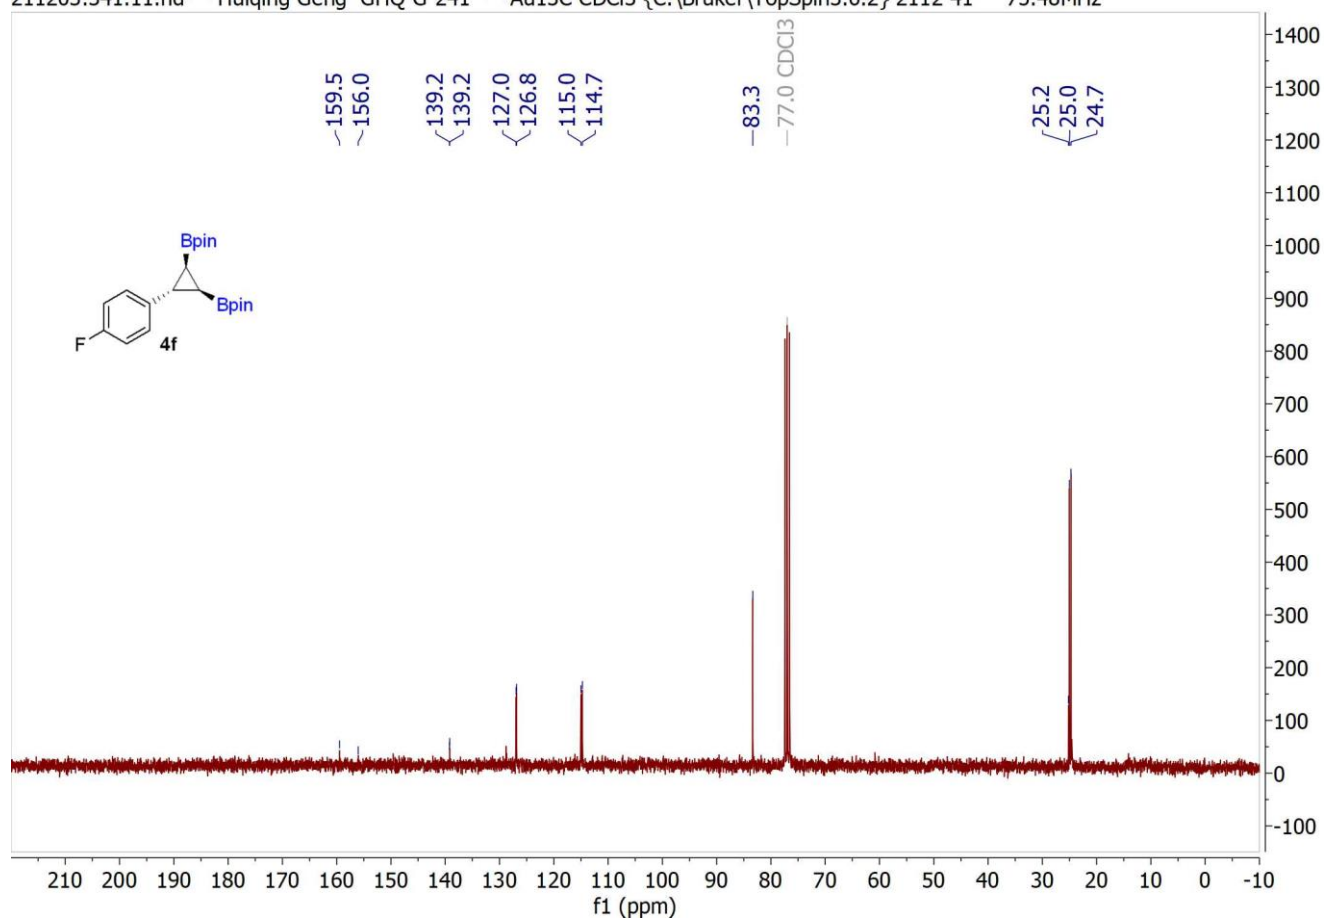



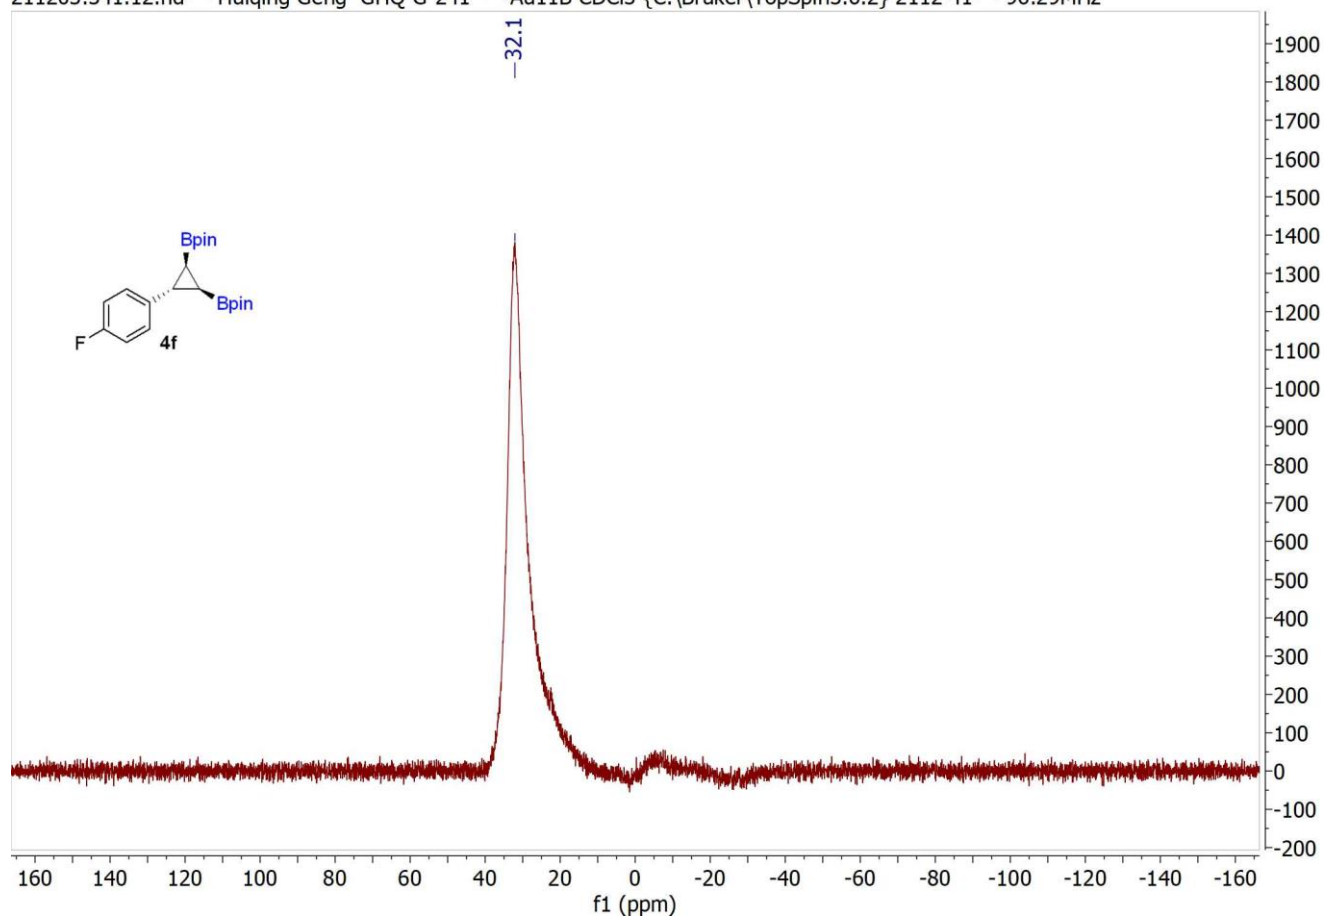

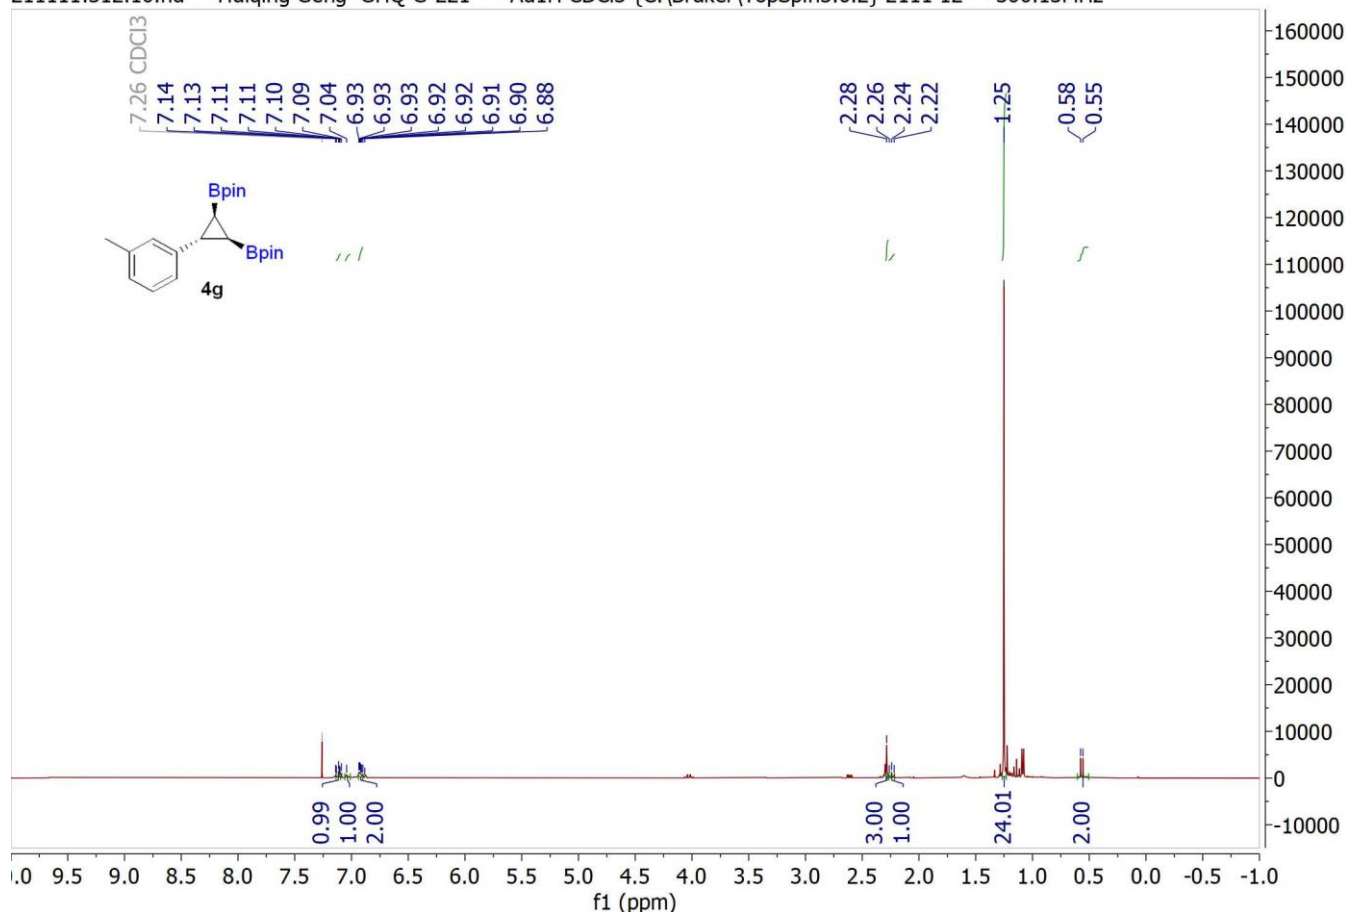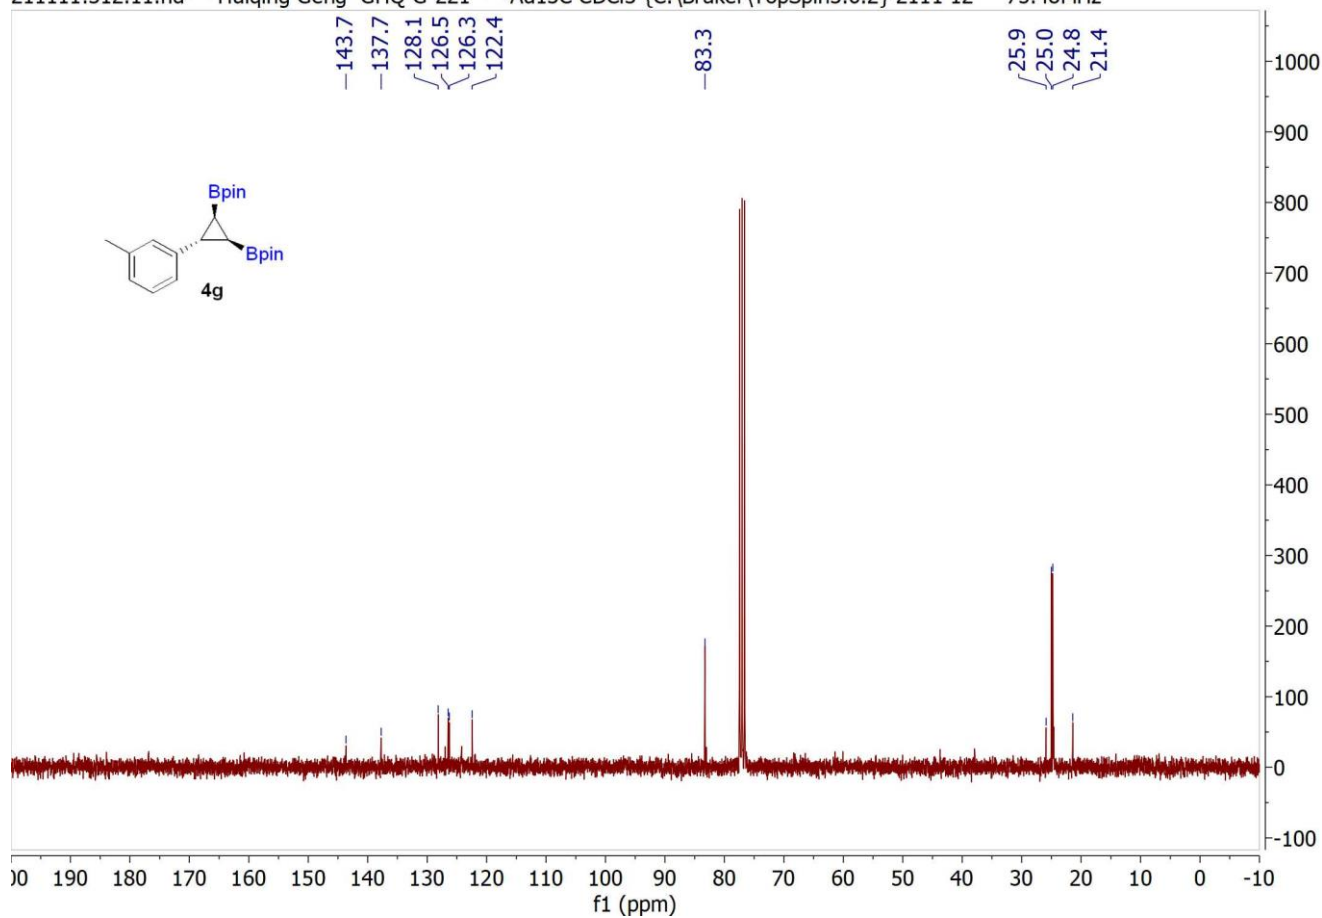

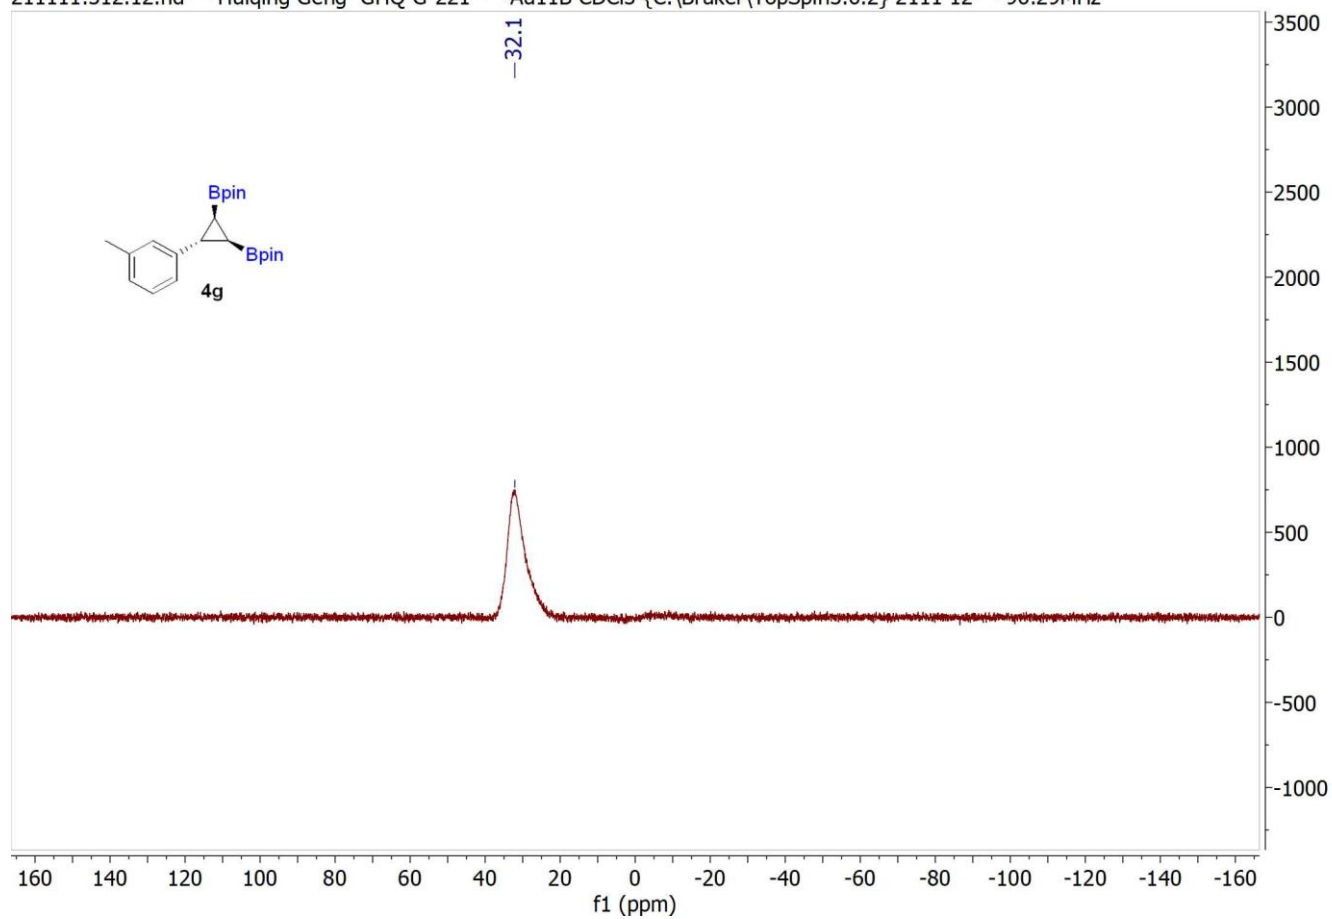

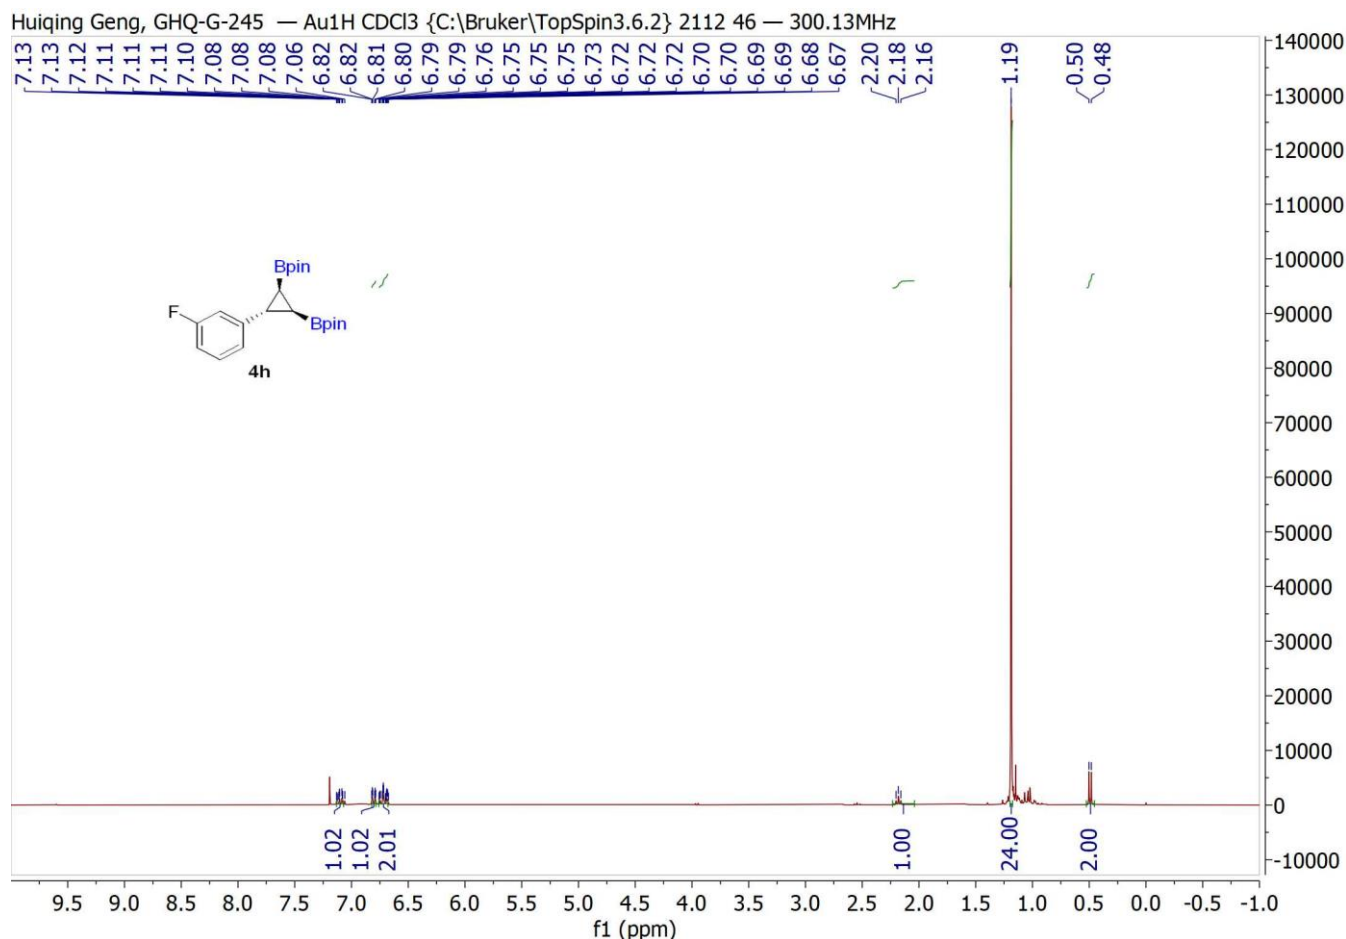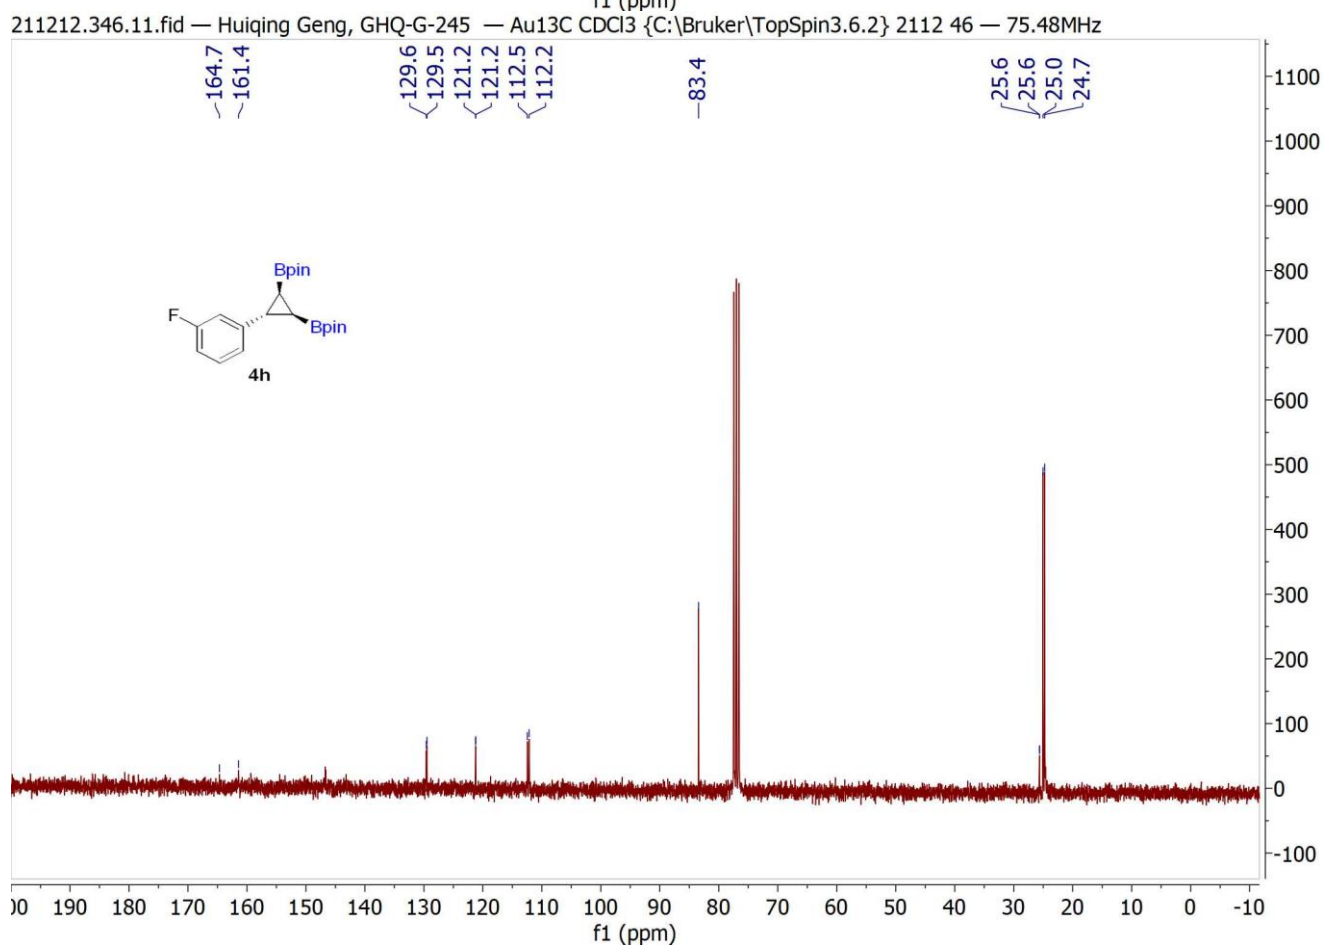

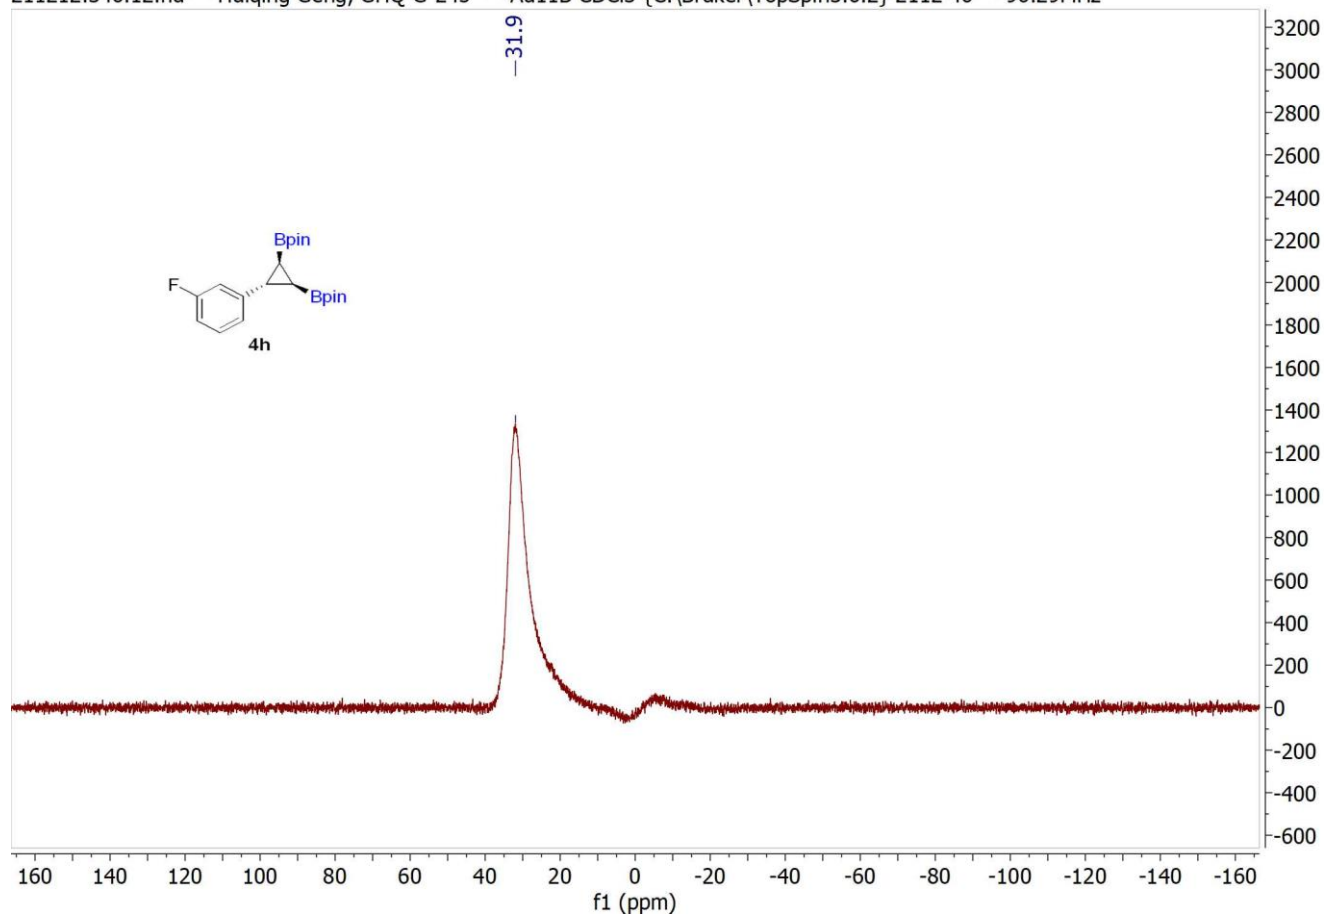

Huiqing Geng GHQ-F-239 — Au1H CDCl3 {C:\Bruker\TopSpin3.6.2} 2112 29 — 300.13MHz

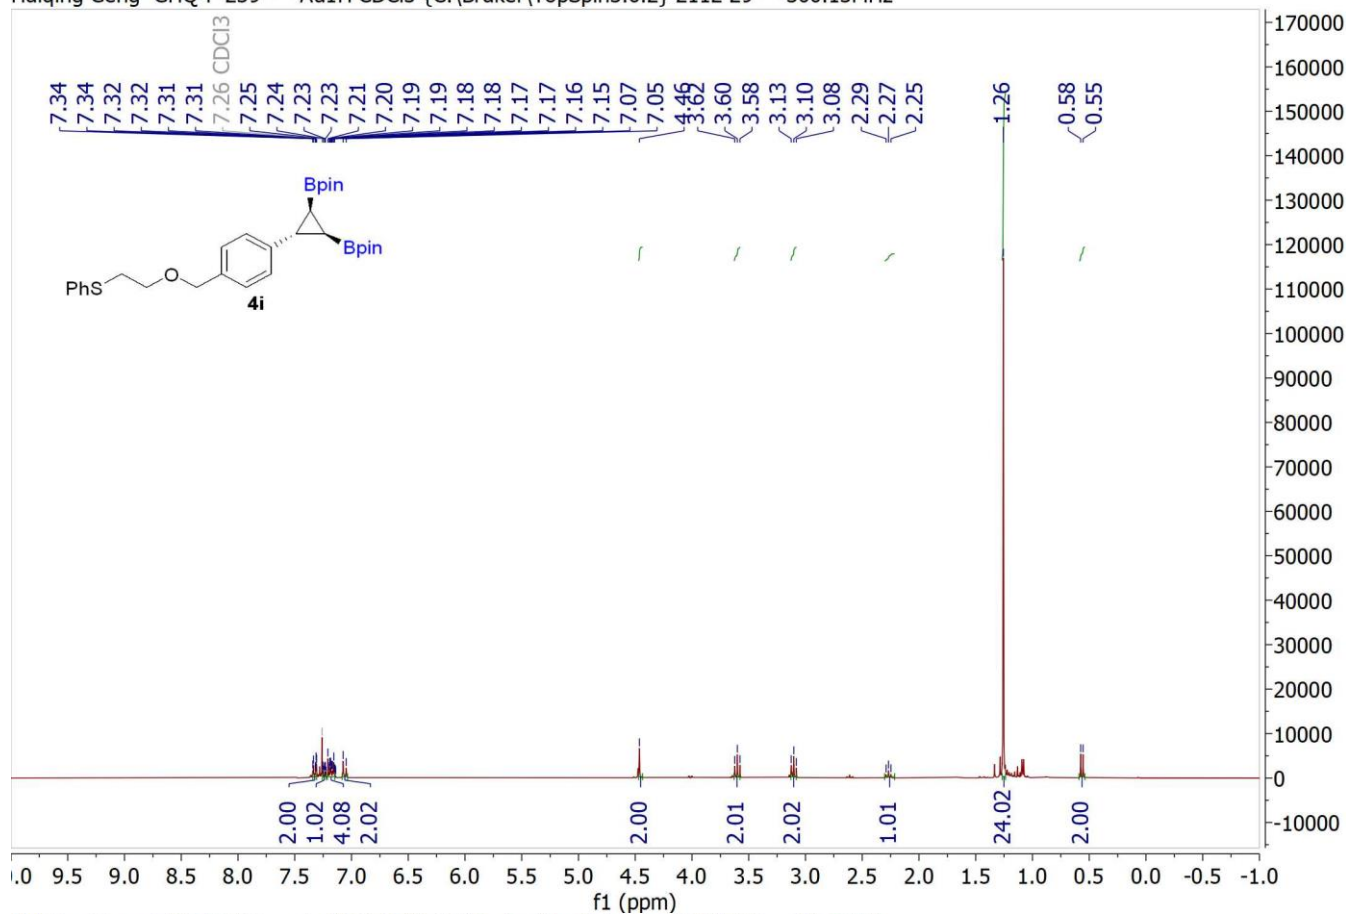

Huiqing Geng GHQ-F-239 — Au13C CDCl3 {C:\Bruker\TopSpin3.6.2} 2112 29 — 75.48MHz

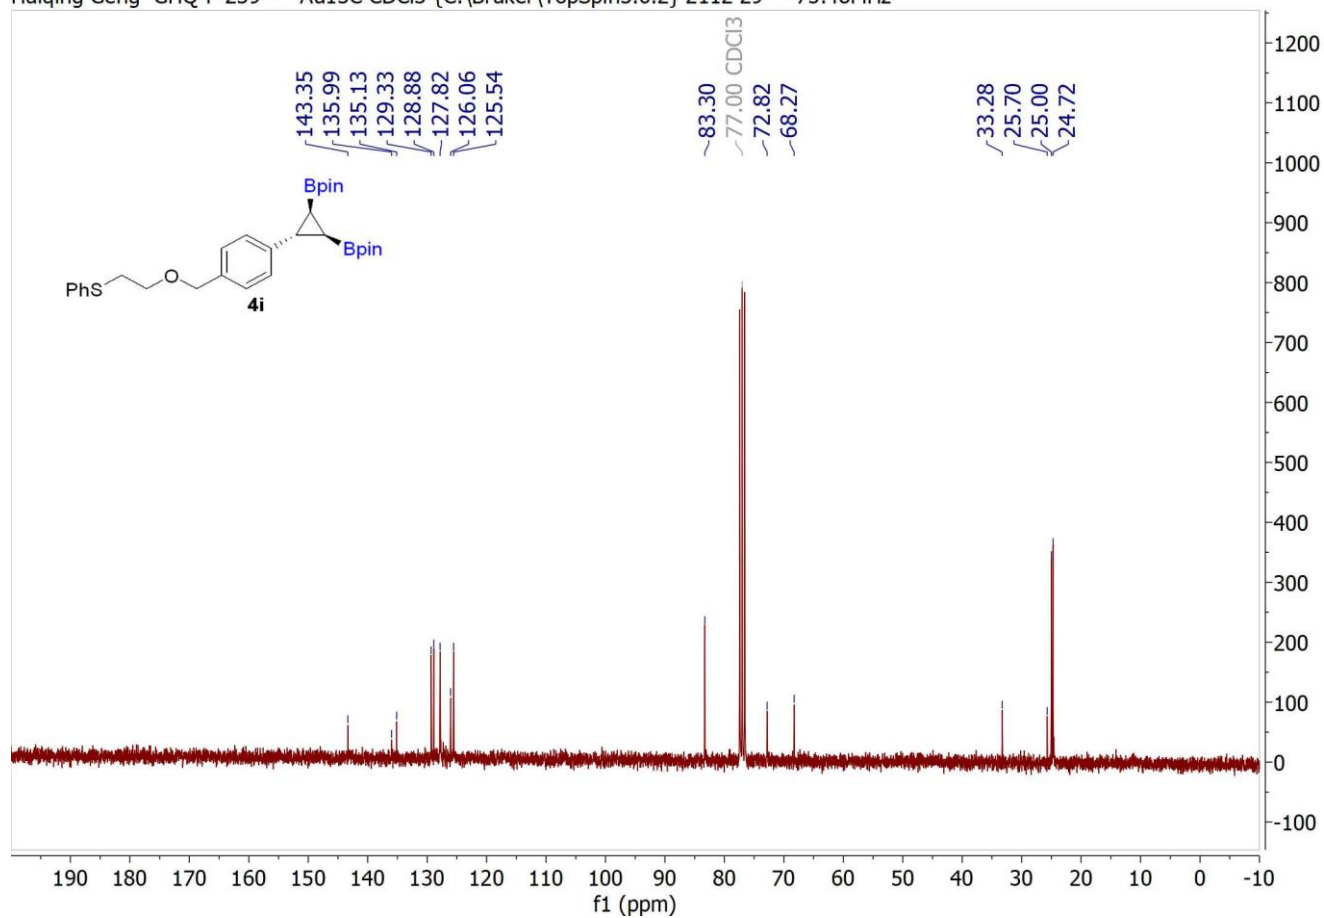

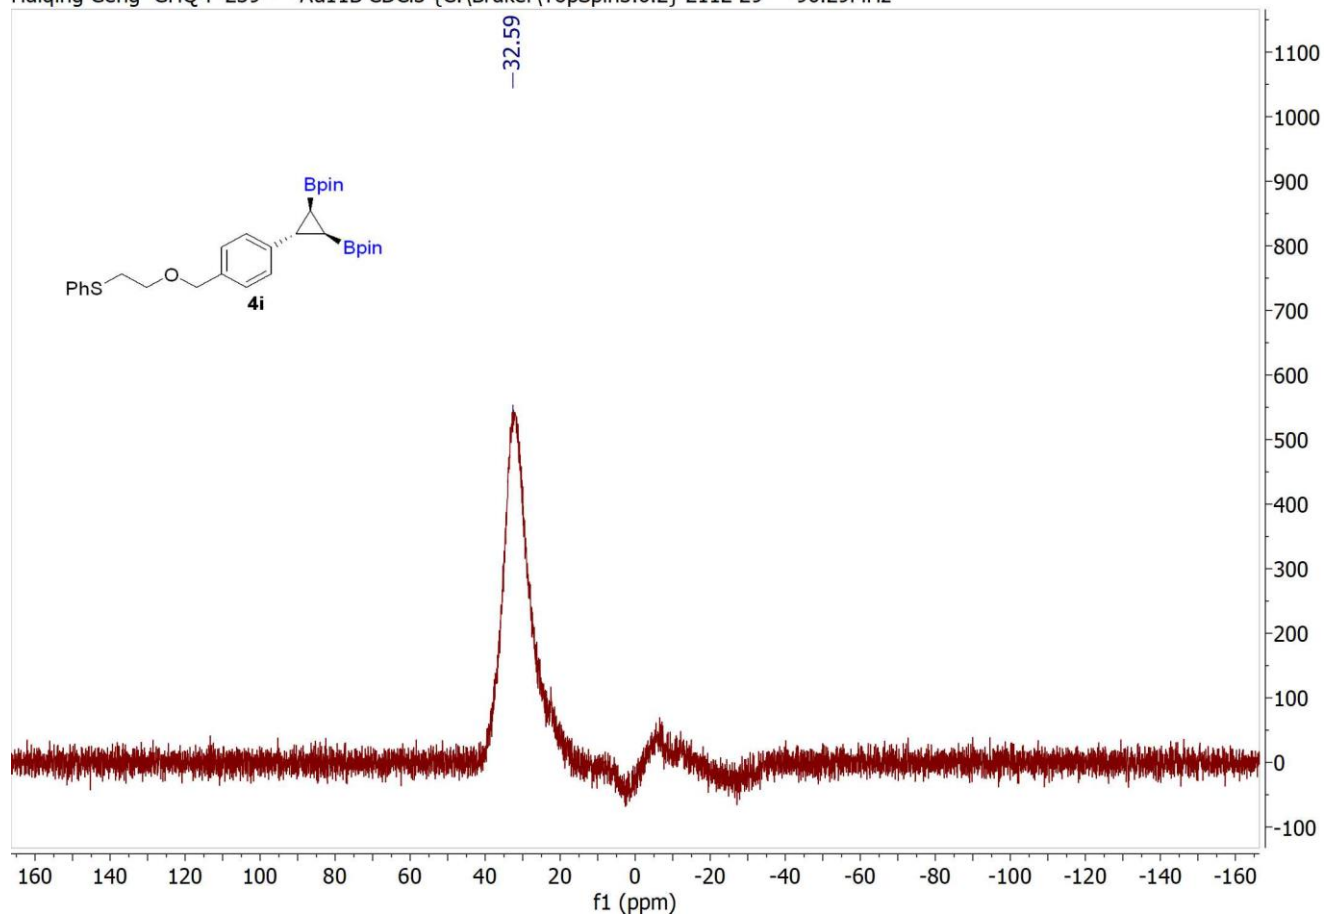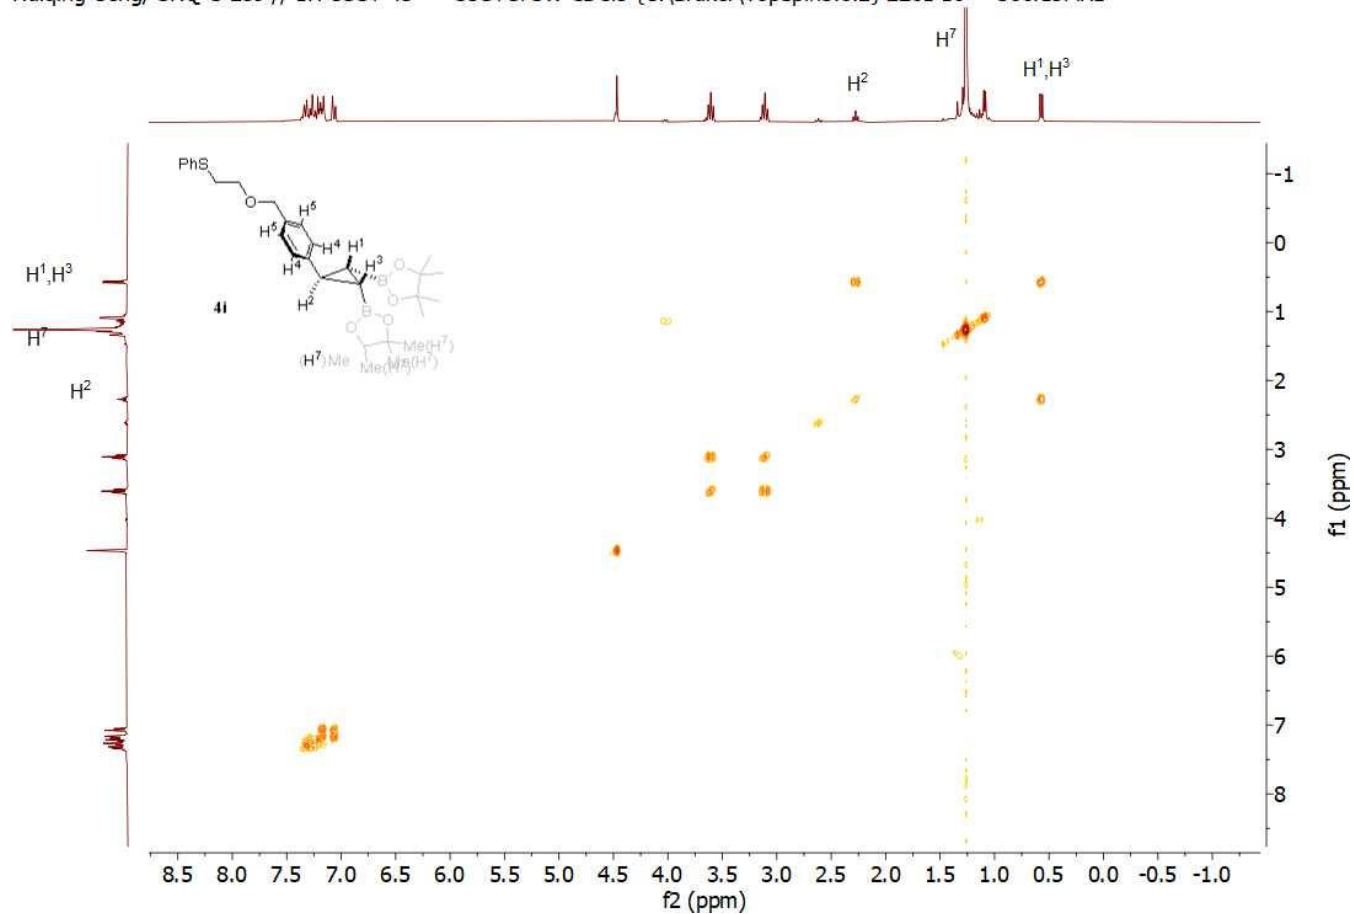

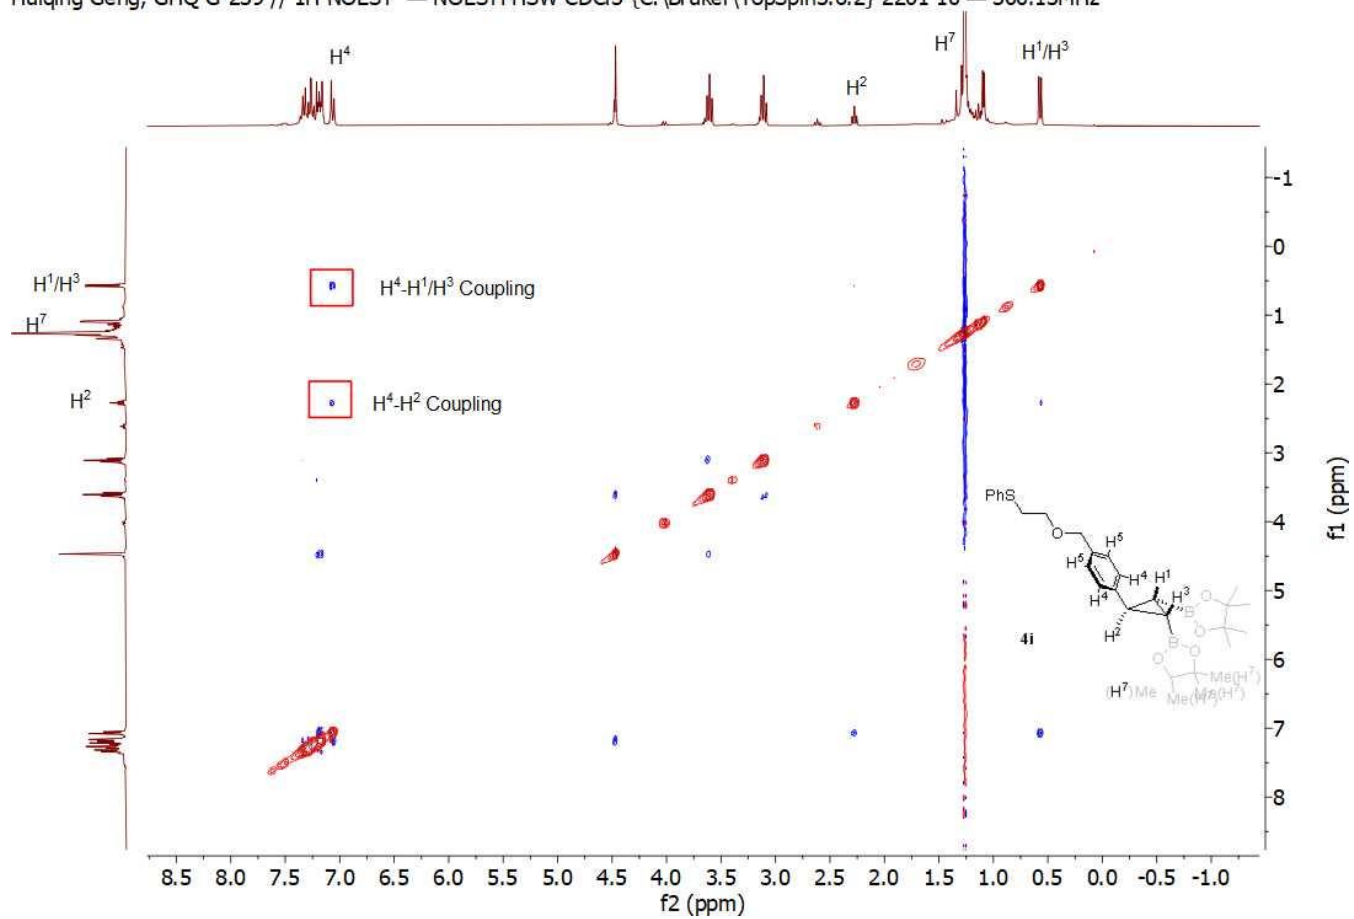



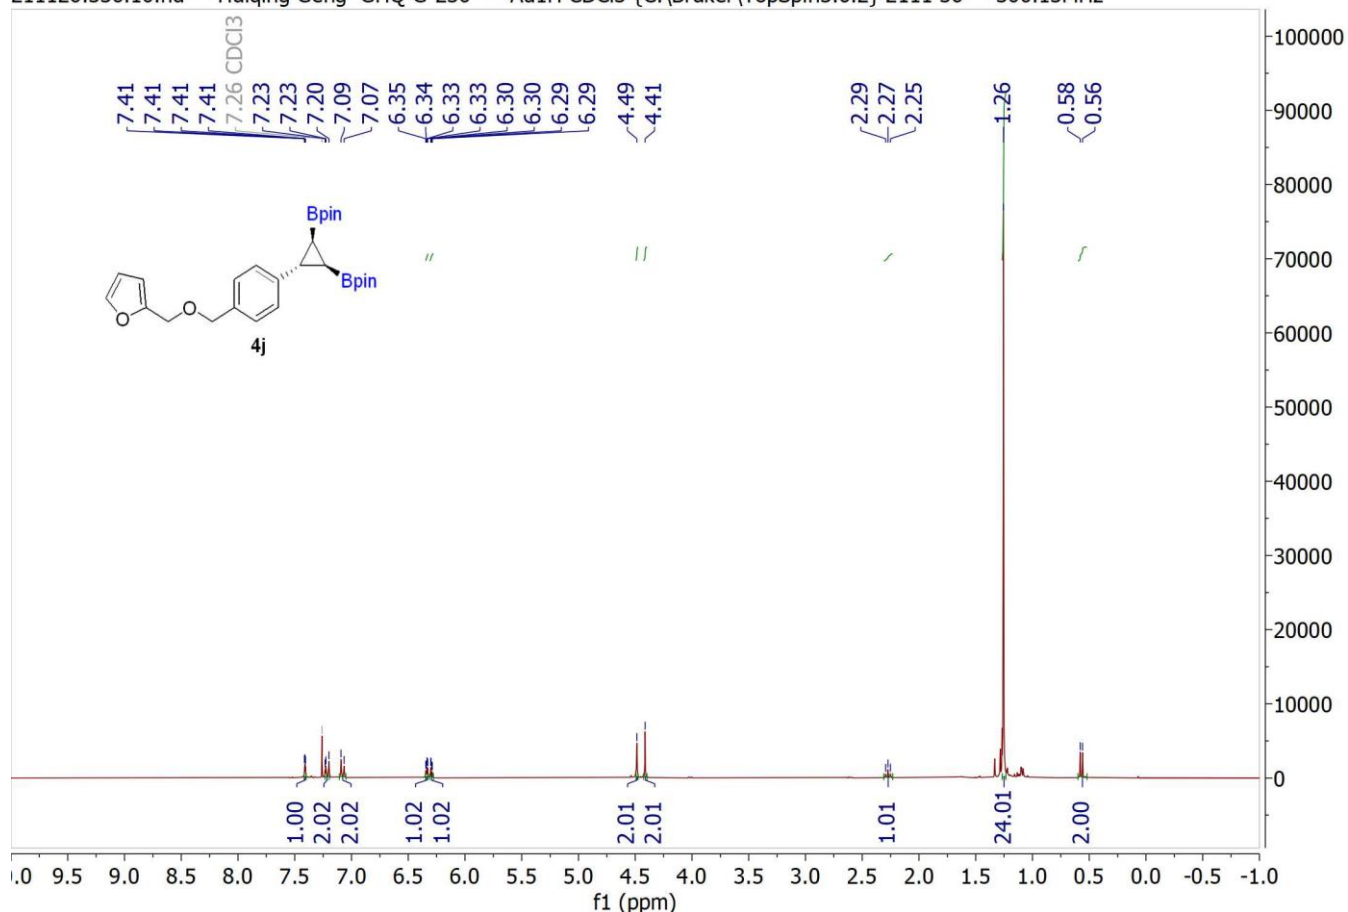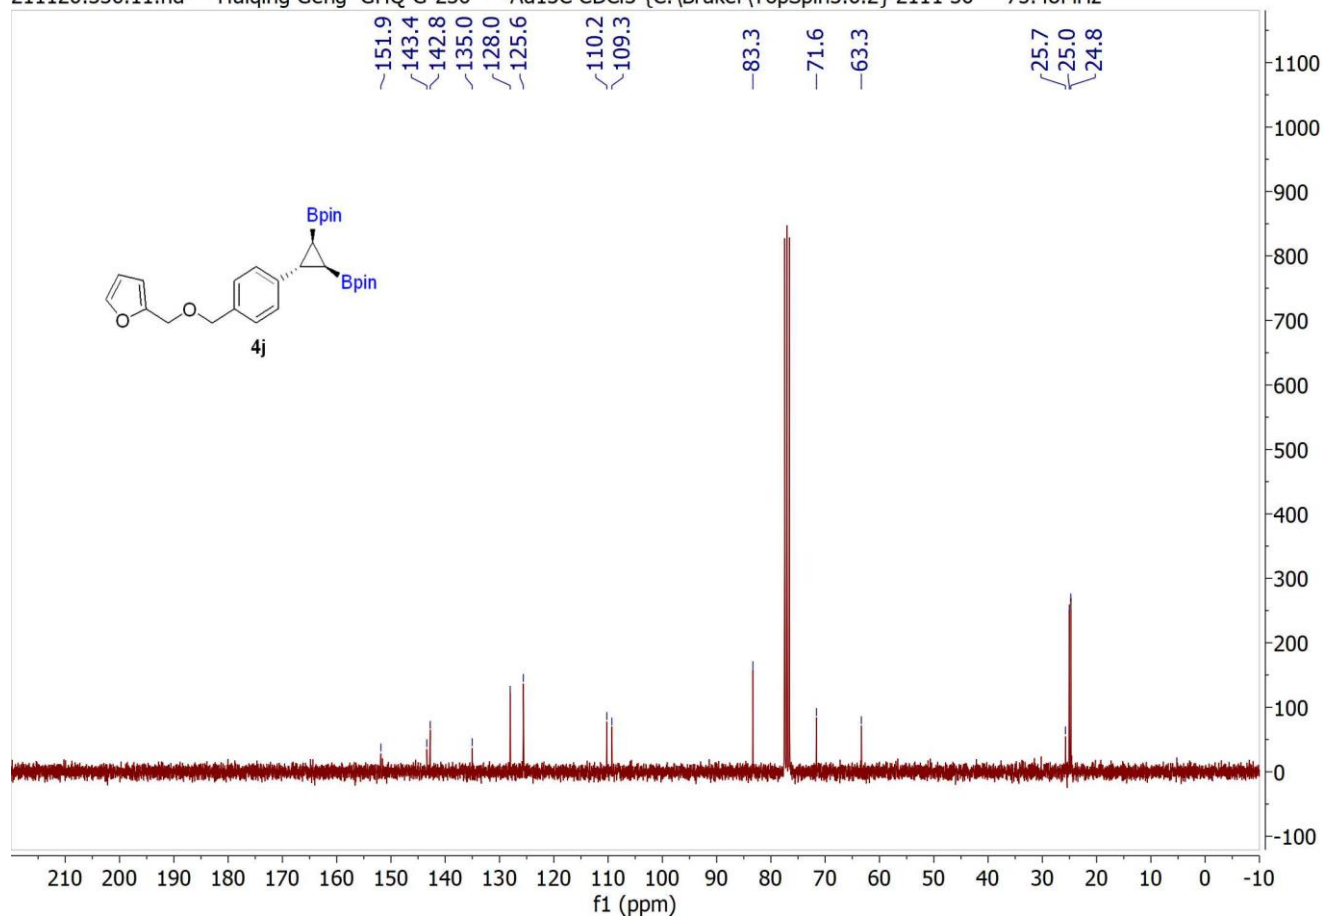

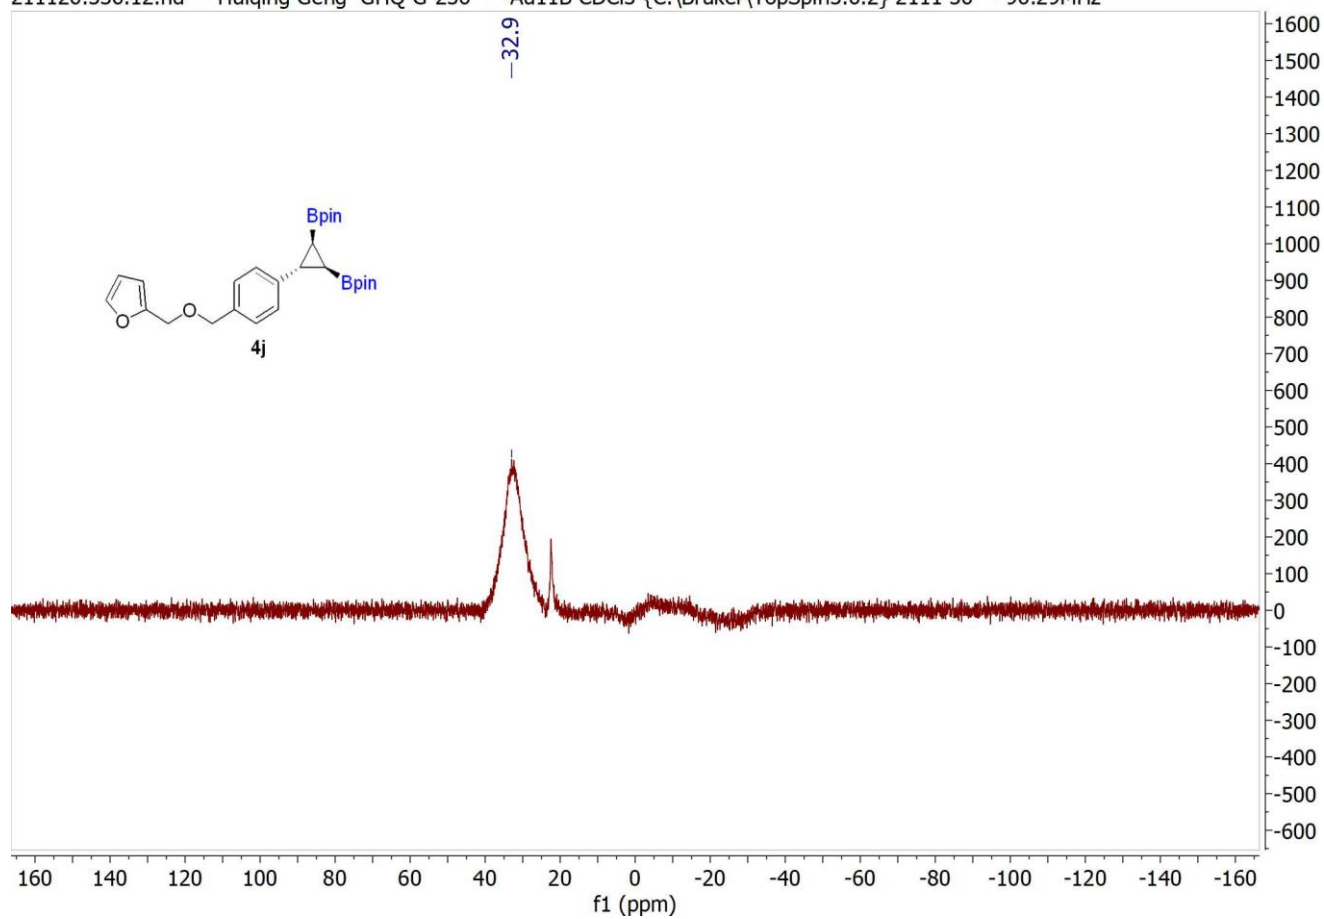

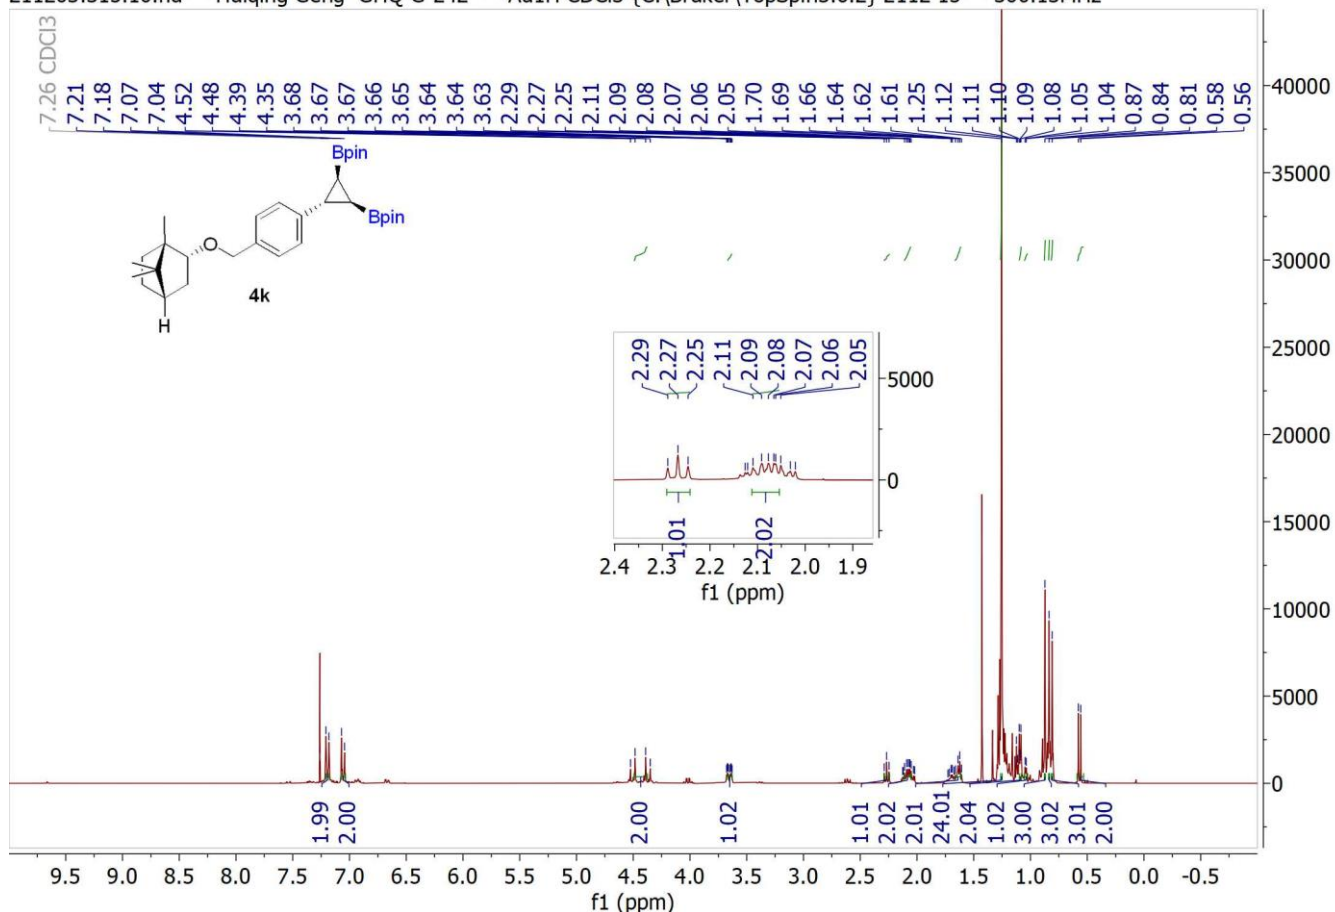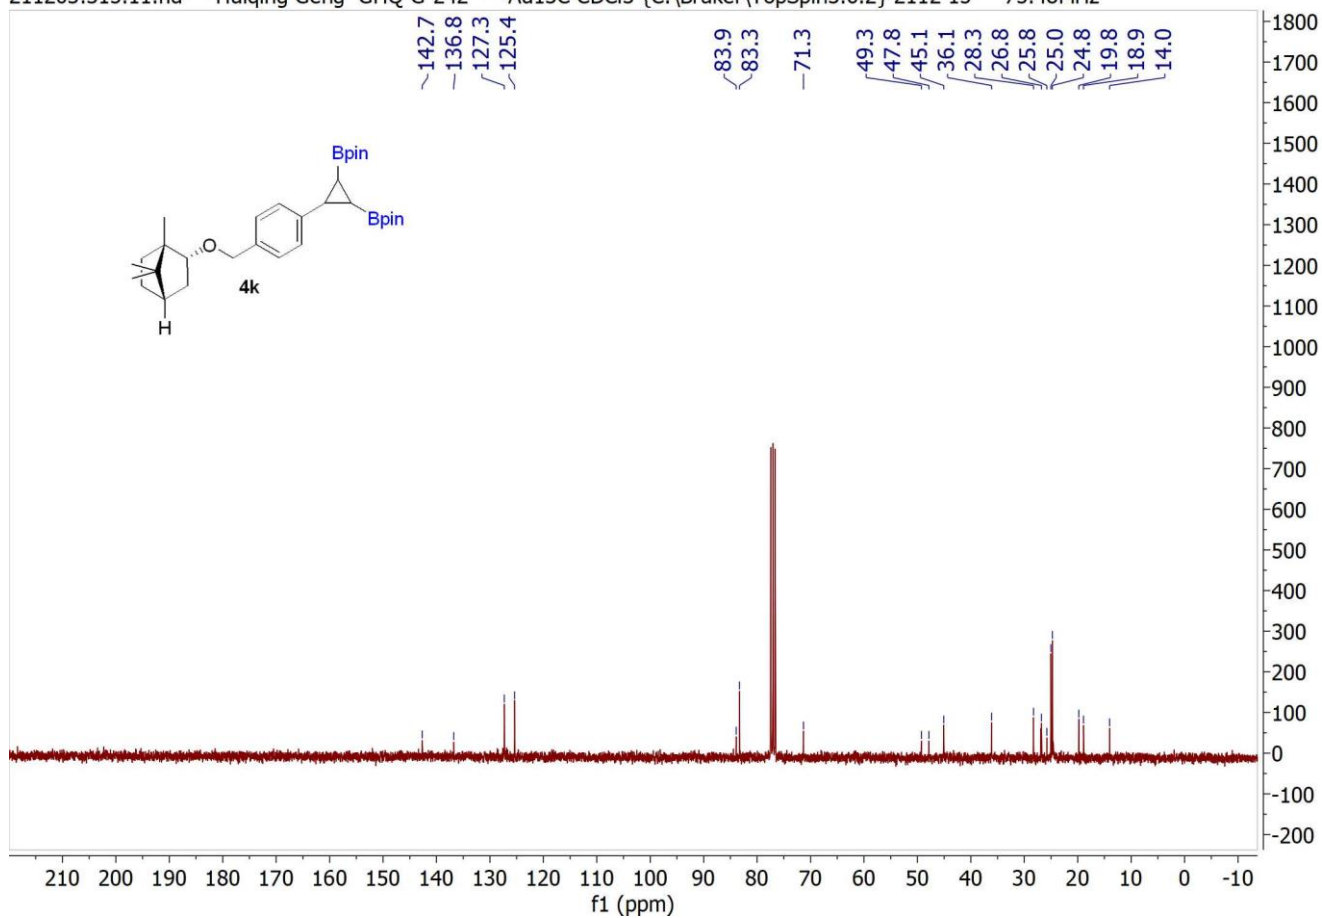

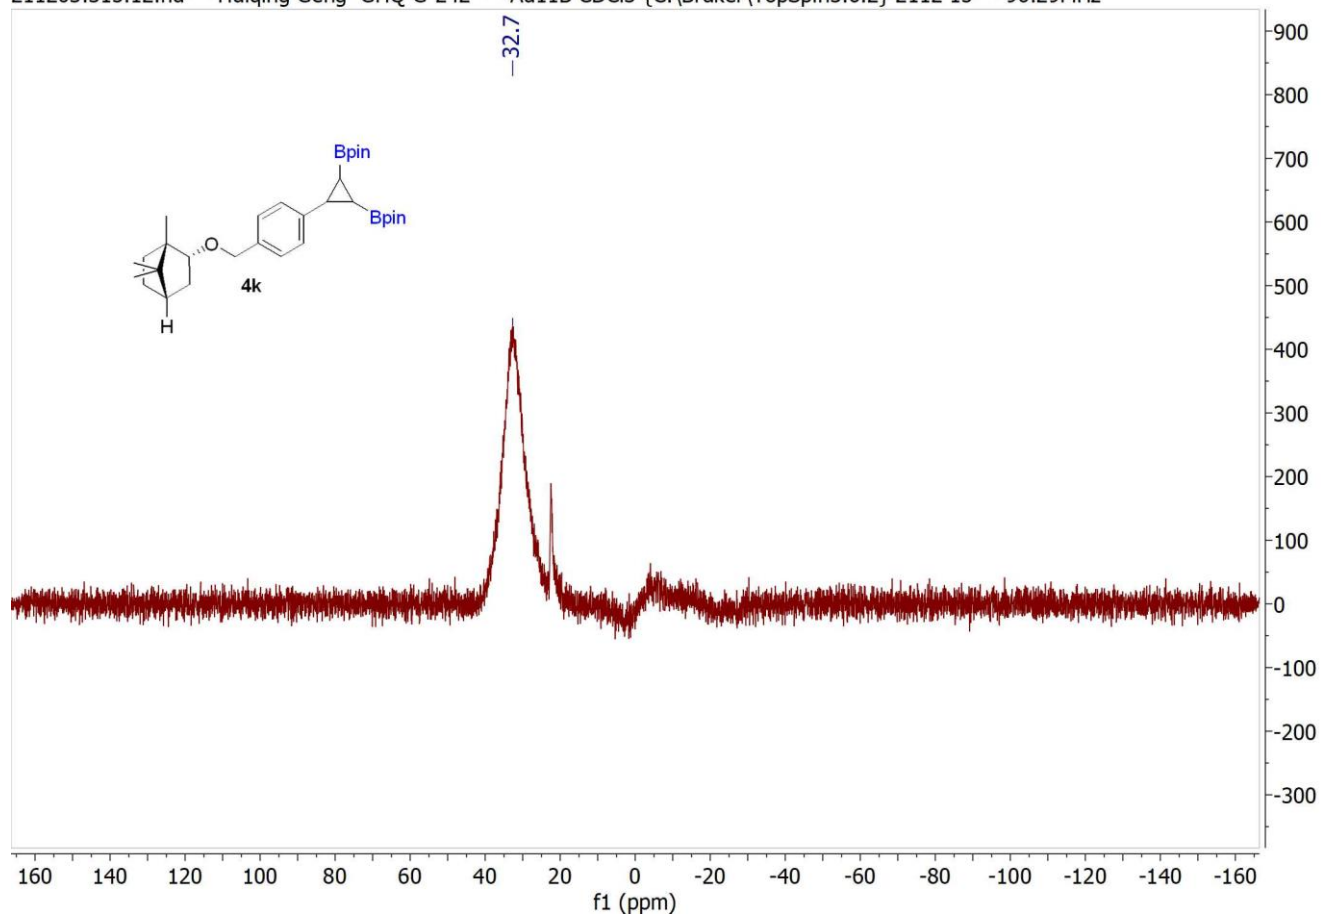

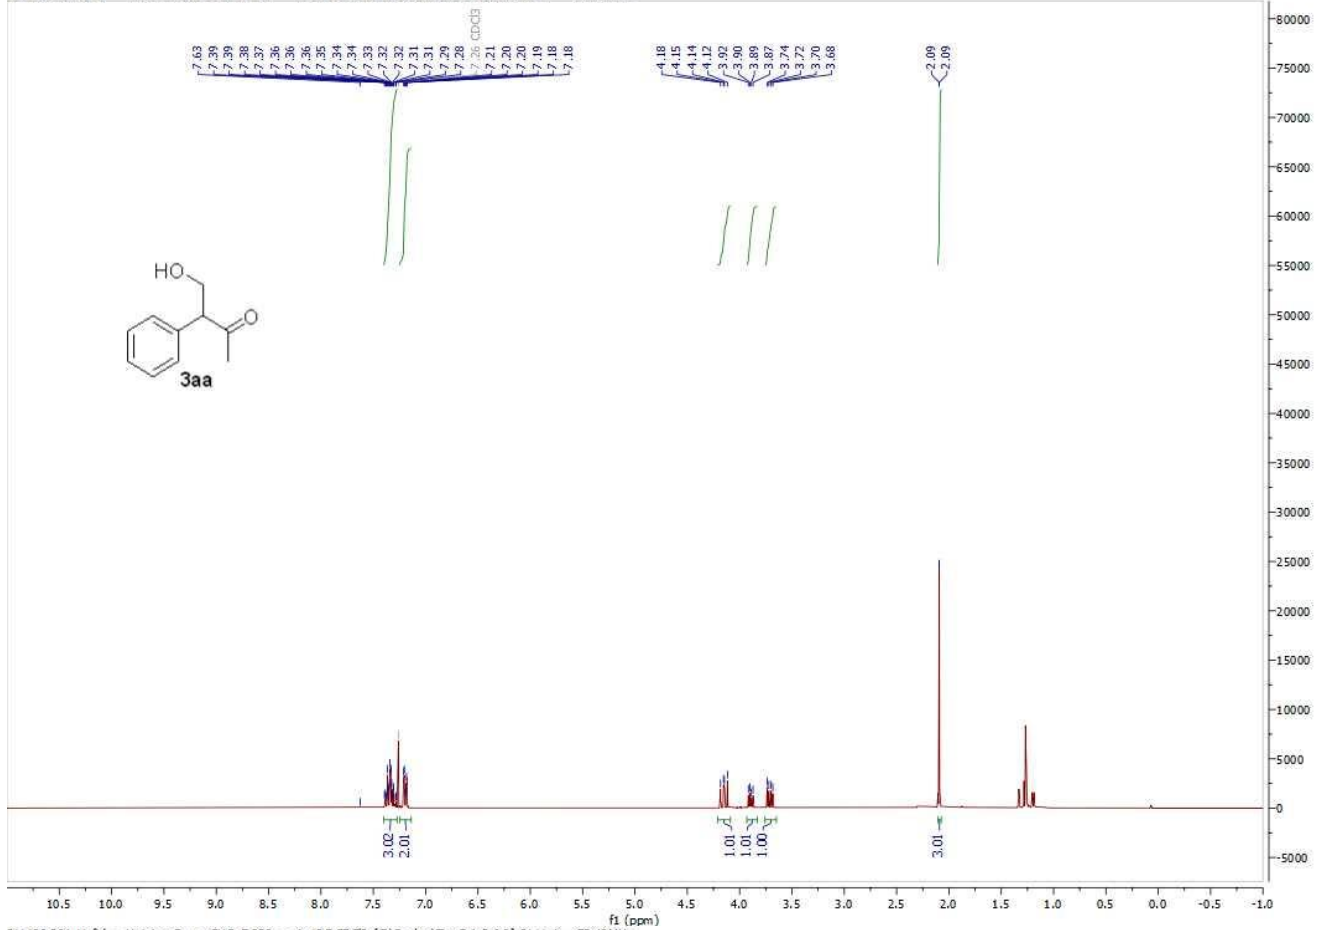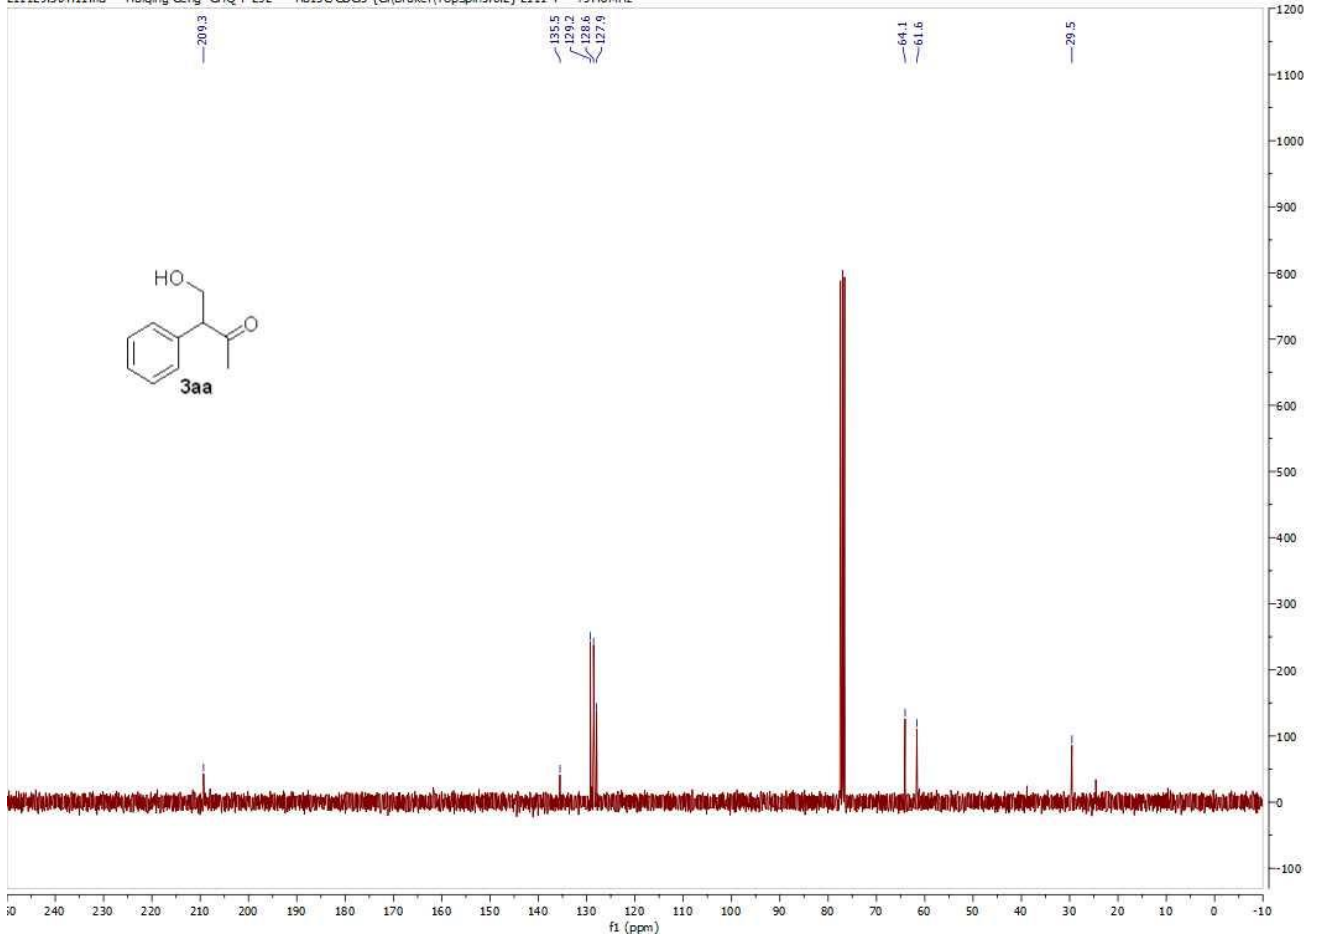

Huiqing Geng GHQ-F-253 — Au1H CDCl3 {C:\Bruker\TopSpin3.6.2} 2111 5 — 300.13MHz

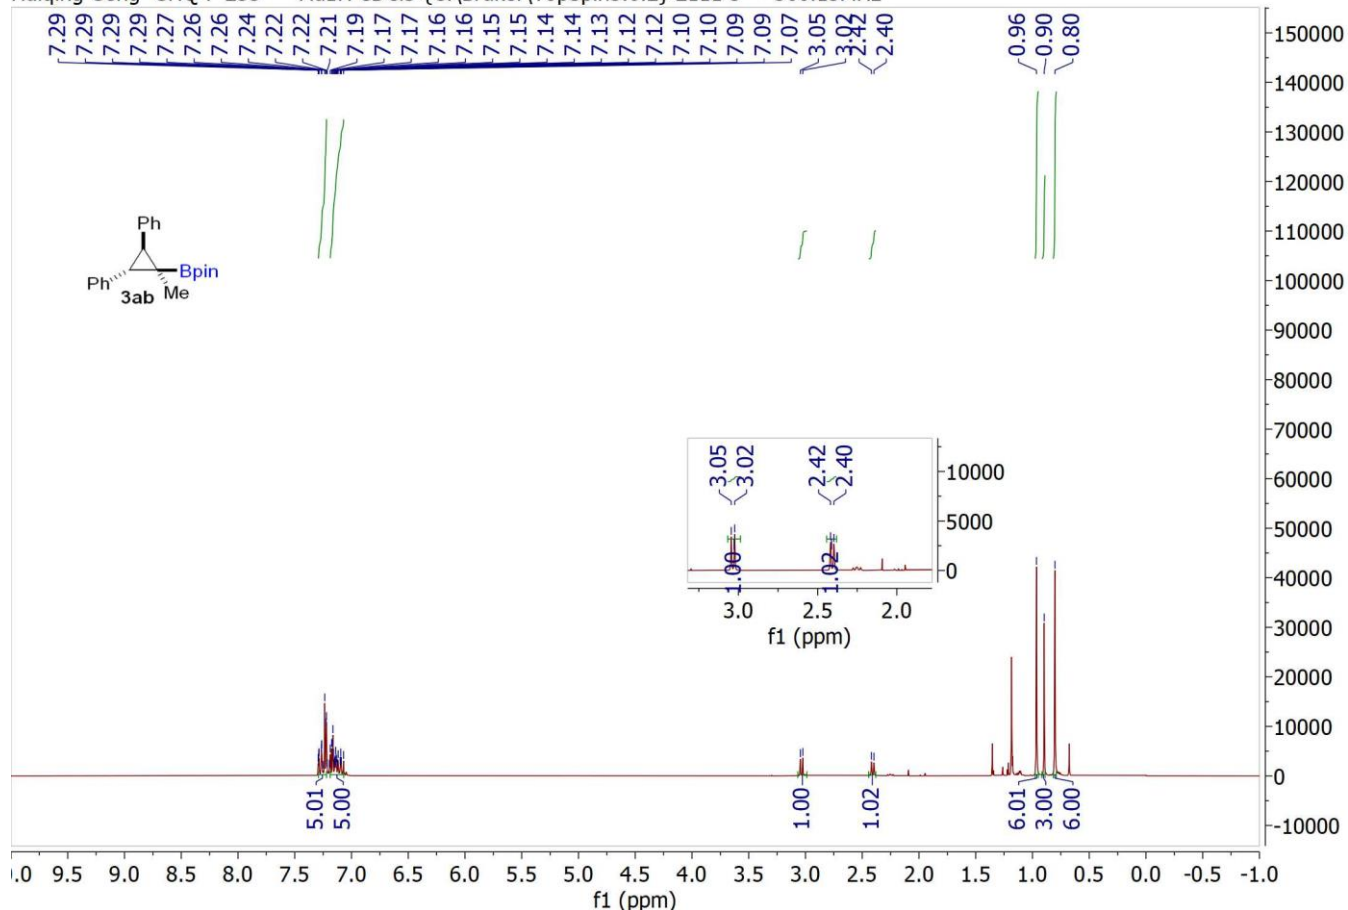

Huiqing Geng GHQ-F-253 — Au13C CDCl3 {C:\Bruker\TopSpin3.6.2} 2111 5 — 75.48MHz

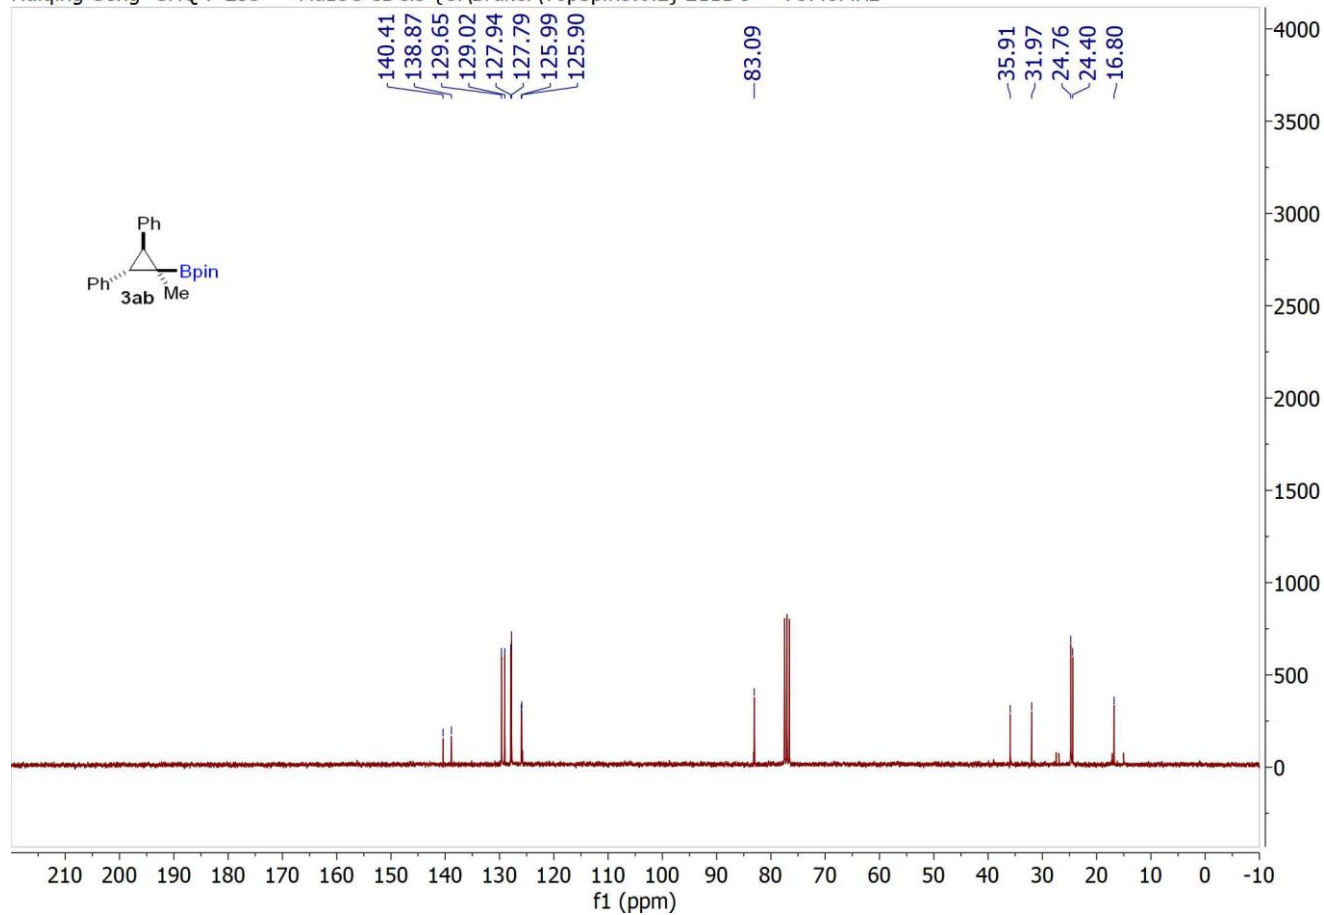

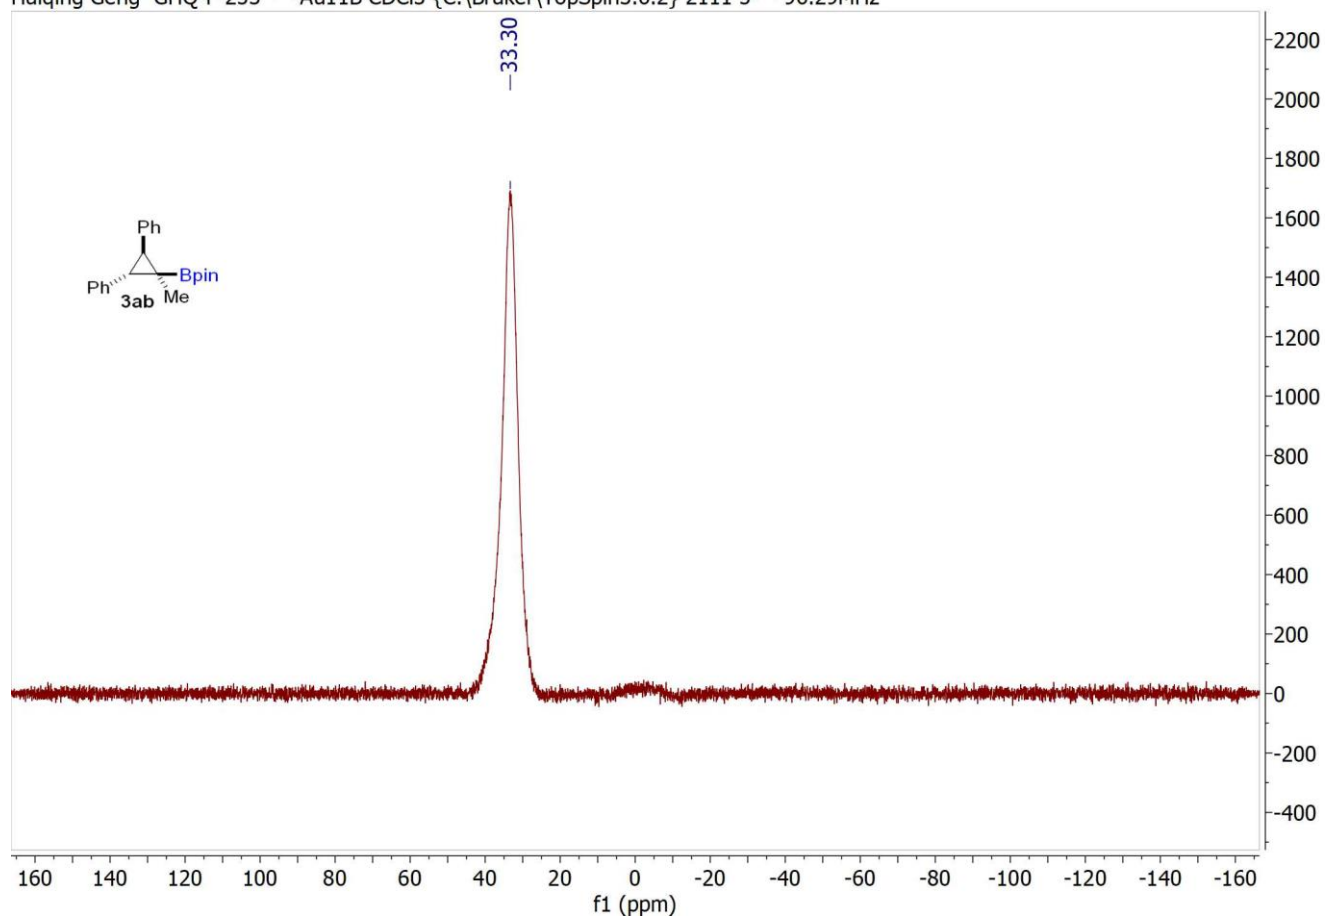

Huiqing Geng GHQ-F-255 — Au1H CDCl3 (C)Bruker(TopSpin3.6.2) 2112 28 — 300.13MHz

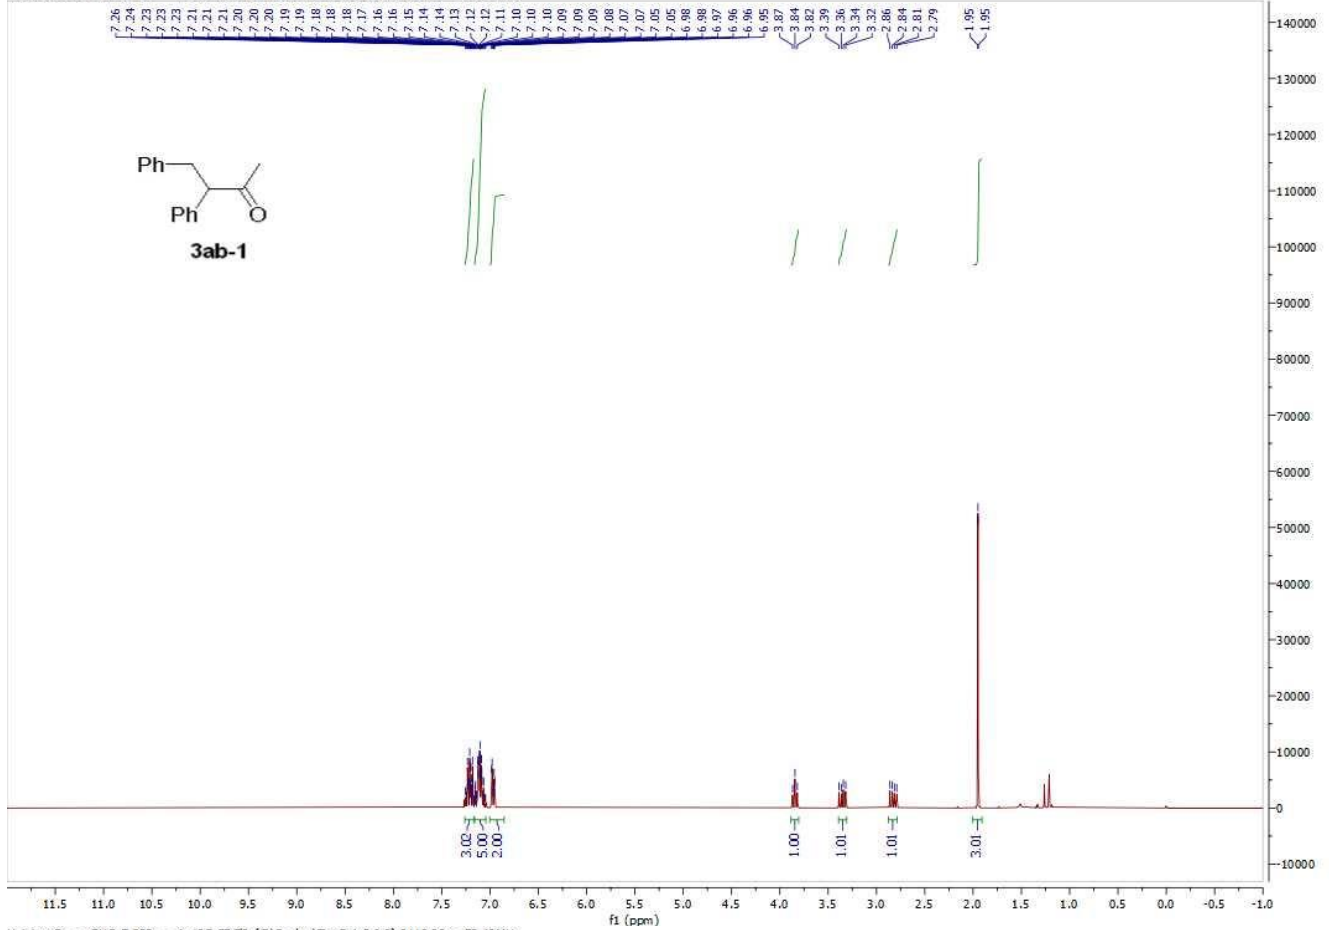

Huiqing Geng GHQ-F-255 — Au13C CDCl3 (C)Bruker(TopSpin3.6.2) 2112 28 — 75.48MHz

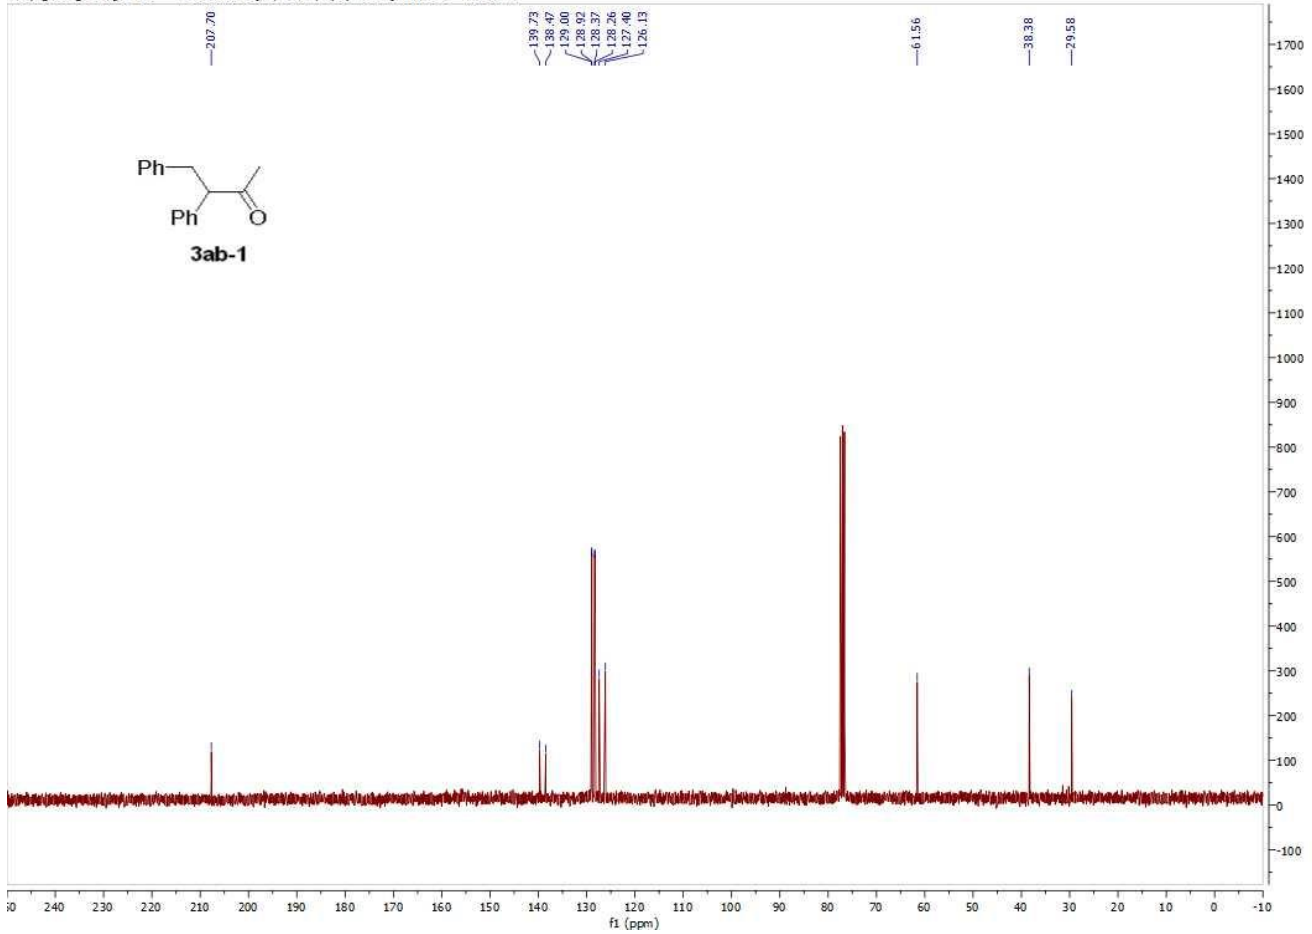



Huiqing Geng GHQ-F-260 — Au1H CDCl3 {C:\Bruker\TopSpin3.6.2} 2112 4 — 300.13MHz

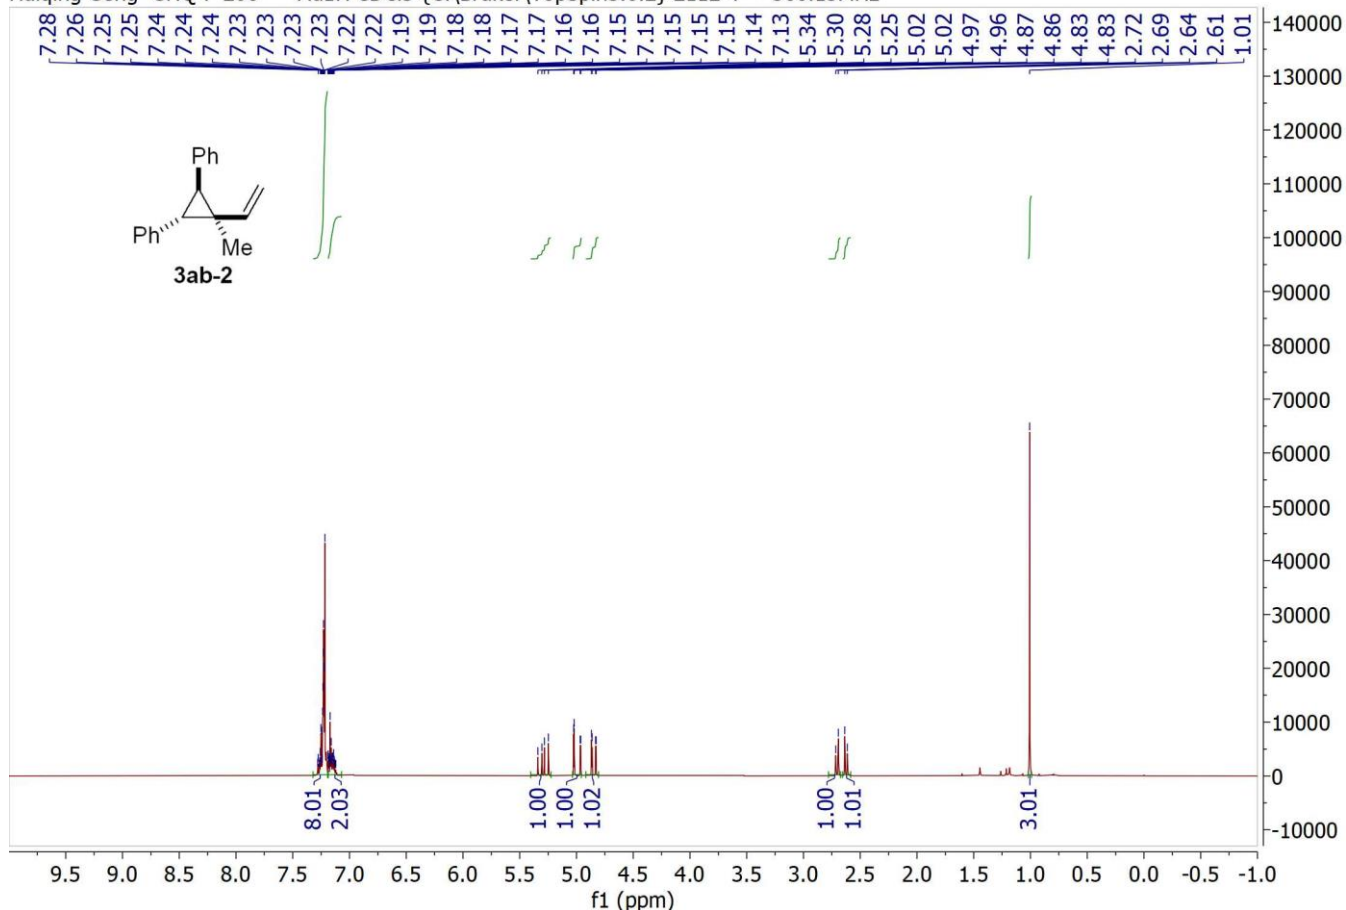

Huiqing Geng GHQ-F-260 — Au13C CDCl3 {C:\Bruker\TopSpin3.6.2} 2112 4 — 75.48MHz

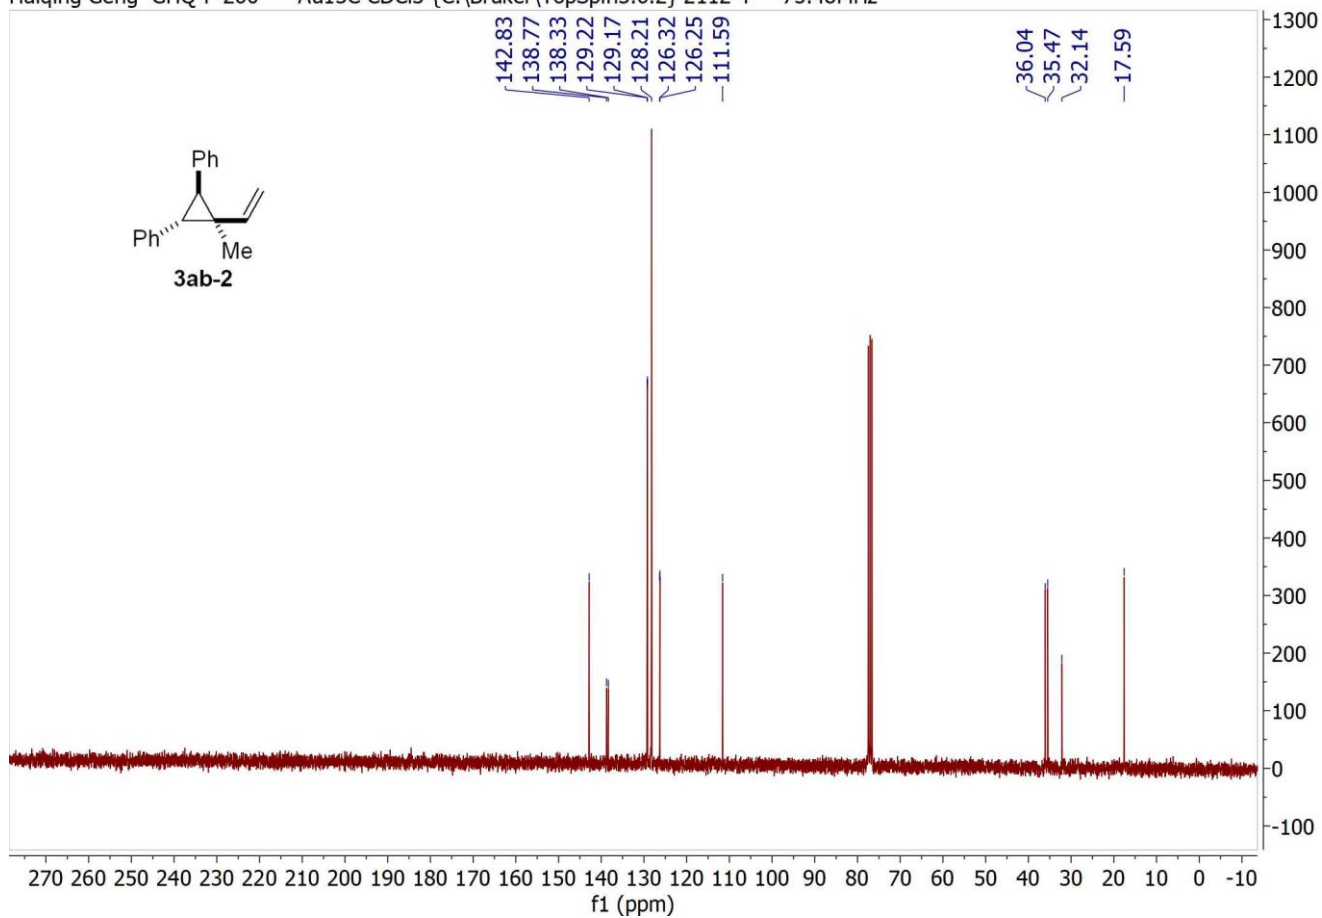

Huiqing Geng GHQ-F-258 — Au1H CDCl3 {C:\Bruker\TopSpin3.6.2} 2112 3 — 300.13MHz

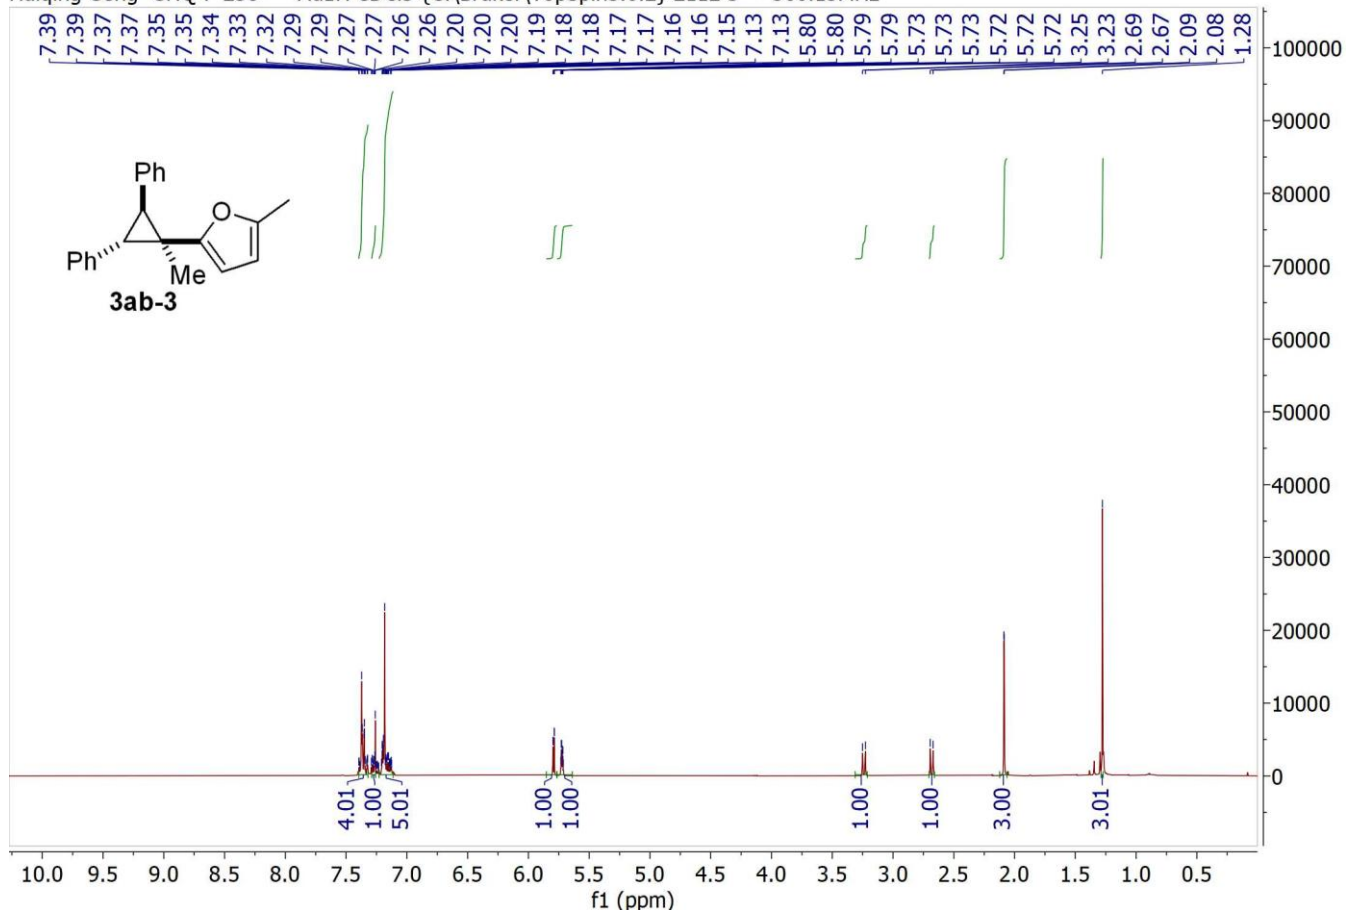

Huiqing Geng GHQ-F-258 — Au13C CDCl3 {C:\Bruker\TopSpin3.6.2} 2112 3 — 75.48MHz

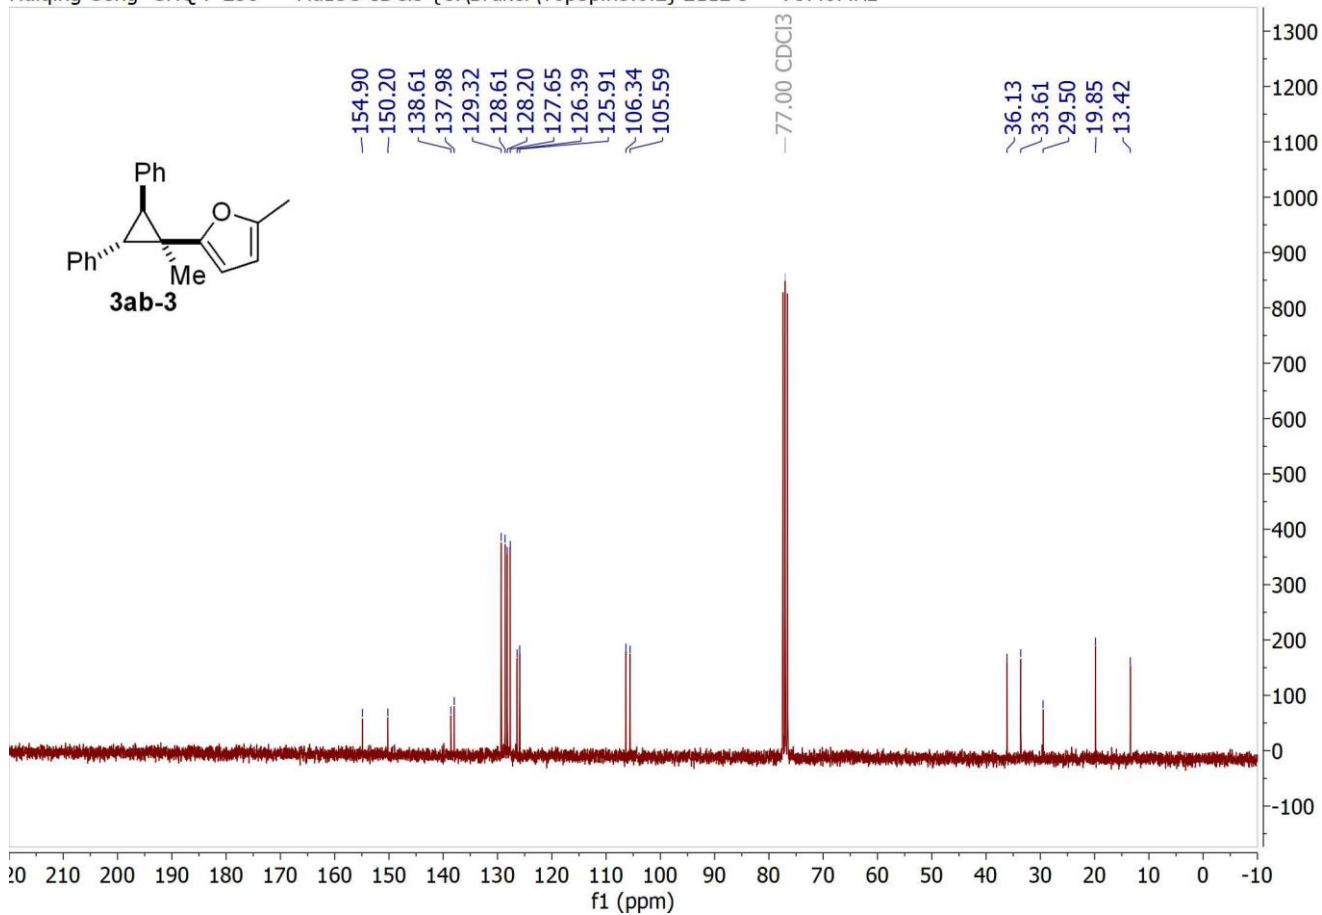

CH<sub>4</sub>

Huiqing Geng GHQ-F-221 — Au1H CDCl<sub>3</sub> (C:\Bruker\TopSpin3.6.2) 2110 25 — 300.13MHz

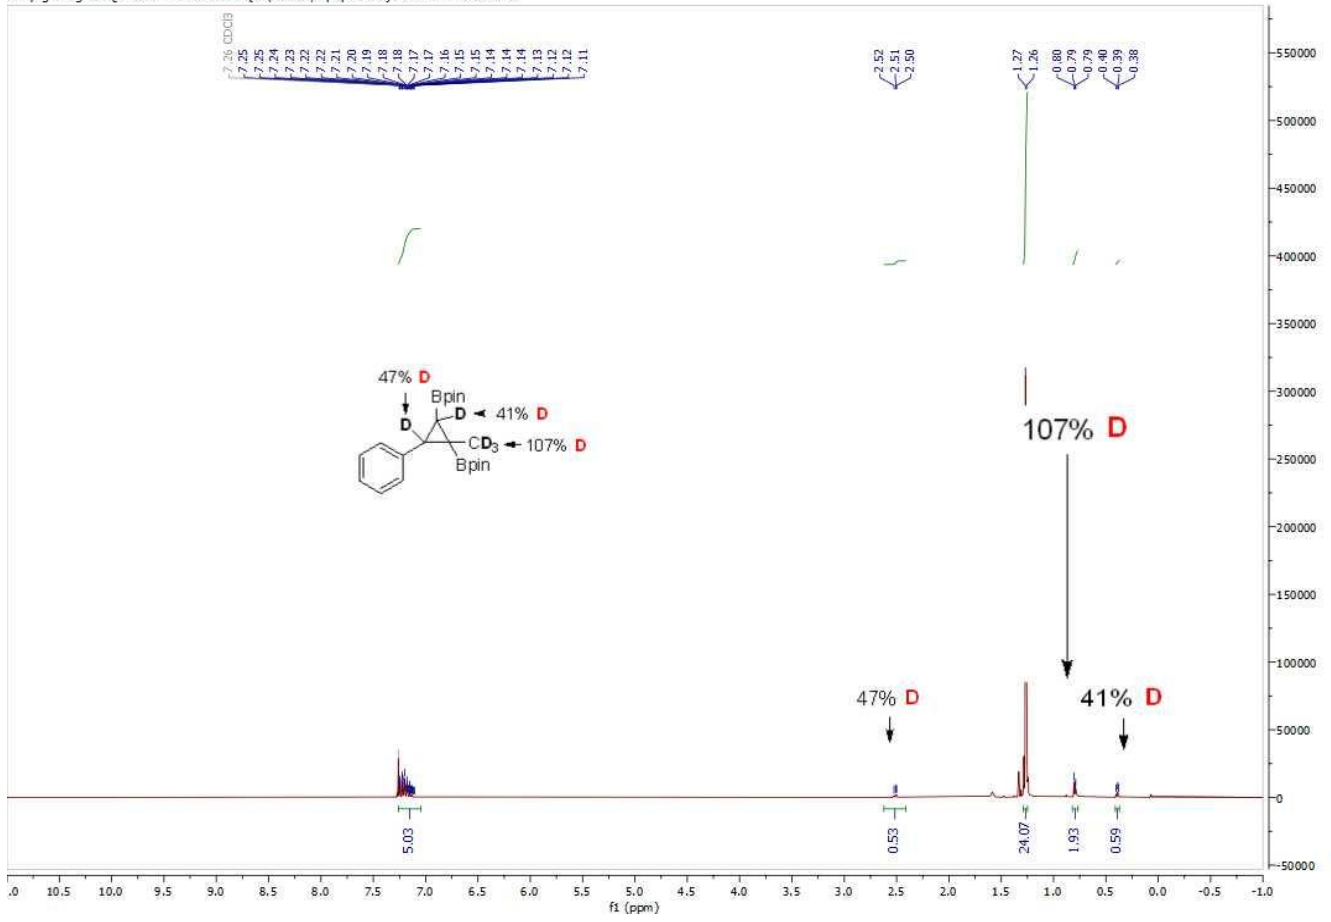

## 8. X-Ray data

### checkCIF/PLATON report

Structure factors have been supplied for datablock(s) AX2331

THIS REPORT IS FOR GUIDANCE ONLY. IF USED AS PART OF A REVIEW PROCEDURE FOR PUBLICATION, IT SHOULD NOT REPLACE THE EXPERTISE OF AN EXPERIENCED CRYSTALLOGRAPHIC REFEREE.

No syntax errors found. CIF dictionary Interpreting this report

### Datablock: AX2331

---

Bond precision: C-C = 0.0037 A Wavelength=0.71073  
Cell: a=23.931 (5) b=9.526 (2) c=9.259 (2)  
alpha=90 beta=90 gamma=90  
Temperature: 150 K

|                        | Calculated    | Reported      |
|------------------------|---------------|---------------|
| Volume                 | 2110.7 (8)    | 2110.6 (8)    |
| Space group            | P n a 21      | P n a 21      |
| Hall group             | P 2c -2n      | P 2c -2n      |
| Moiety formula         | C21 H32 B2 O4 | ?             |
| Sum formula            | C21 H32 B2 O4 | C21 H32 B2 O4 |
| Mr                     | 370.09        | 370.08        |
| Dx, g cm <sup>-3</sup> | 1.165         | 1.165         |
| Z                      | 4             | 4             |
| Mu (mm <sup>-1</sup> ) | 0.077         | 0.077         |
| F000                   | 800.0         | 800.0         |
| F000'                  | 800.36        |               |
| h, k, lmax             | 31, 12, 12    | 31, 12, 12    |
| Nref                   | 5101 [ 2707]  | 5099          |
| Tmin, Tmax             | 0.963, 0.986  | 0.960, 0.990  |
| Tmin'                  | 0.963         |               |

Correction method= # Reported T Limits: Tmin=0.960 Tmax=0.990  
AbsCorr = MULTI-SCAN

Data completeness= 1.88/1.00 Theta (max)= 27.989

R(reflections)= 0.0454 ( 4752) wR2 (reflections)=  
0.1232 ( 5099)  
S = 1.016 Npar= 252

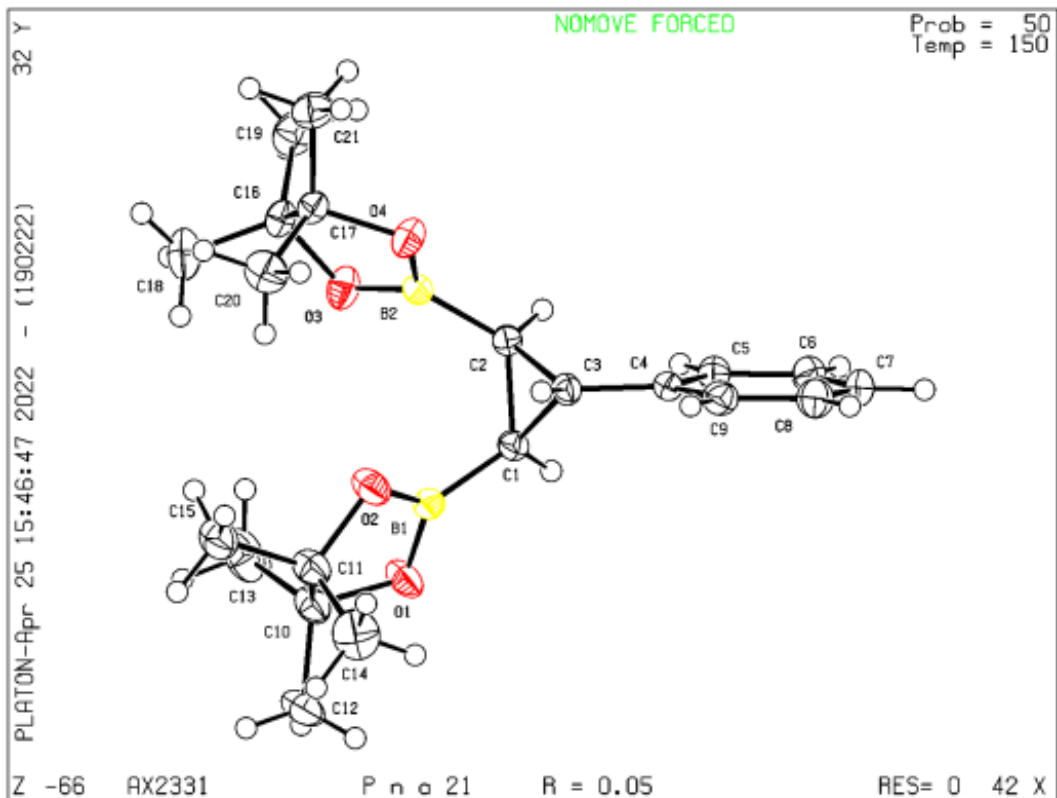

Supplement: d2qo00976e2.pdf [file d2qo00976e2.pdf]
